# Supplementary material
Source: publisher figshare collection journal article supplement (https://future-science-group.figshare.com/ndownloader/files/35067967)
Supplement: Supplementary file 1 [file 35067967]

SUPPLEMENTAL MATERIALS

# **Supplemental Figure I. Patient sample subsets and their associated outcomes.**

*Footnote to Supplemental Figure 1*

# Each progressive subset is described on the left, with their associated outcomes listed on the right. AF, atrial fibrillation; CV, cardiovascular.

**Supplemental Table I.** Patient and procedure characteristics for assessment of total index admission and supply cost

|  | **Pre-Match** | | | **Post-Match** | | |
| --- | --- | --- | --- | --- | --- | --- |
| **Characteristics** | **STSF**  **(n = 7,758)** | **AFA**  **(n = 3,761)** | **SMD** | **STSF**  **(n = 2,767)** | **AFA**  **(n = 2,767)** | **SMD** |
| **Age (years)** | 64.96 (±10.16) | 64.93 (±10.25) | 0.0031 | 63.98 (±10.33) | 65.14 (±10.15) | -0.1126 |
| 18-49 | 591 (7.62%) | 296 (7.87%) | -0.0094 | 256 (9.25%) | 201 (7.26%) | 0.0723 |
| 50-59 | 1494 (19.26%) | 697 (18.53%) | 0.0185 | 575 (20.78%) | 509 (18.40%) | 0.0601 |
| 60-69 | 2814 (36.27%) | 1390 (36.96%) | -0.0142 | 1048 (37.87%) | 1015 (36.68%) | 0.0247 |
| ≥70 | 2859 (36.85%) | 1378 (36.64%) | 0.0044 | 888 (32.09%) | 1042 (37.66%) | -0.117 |
| **Gender (female)** | 2895 (37.32%) | 1519 (40.39%) | -0.0631 | 1044 (37.73%) | 1101 (39.79%) | -0.0423 |
| **Race (white)** | 6828 (88.01%) | 3465 (92.13%) | -0.138 | 2414 (87.24%) | 2499 (90.31%) | -0.0974 |
| **Payor** |  |  |  |  |  |  |
| Commercial | 3043 (39.22%) | 1425 (37.89%) | 0.0274 | 1175 (42.46%) | 1053 (38.96%) | 0.09 |
| Medicare | 4222 (54.42%) | 2062 (54.83%) | -0.0081 | 1360 (49.15%) | 1534 (55.44%) | -0.1262 |
| Medicaid | 236 (3.04%) | 160 (4.25%) | -0.0647 | 119 (4.30%) | 96 (3.47%) | 0.043 |
| Other | 257 (3.31%) | 114 (3.03%) | 0.0161 | 113 (4.08%) | 84 (3.04%) | 0.0566 |
| **Year** |  |  |  |  |  |  |
| 2016 | 73 (0.94%) | 324 (8.61%) | **-0.3657** | 73 (2.64%) | 80 (2.89%) | -0.0154 |
| 2017 | 1283 (16.54%) | 1214 (32.28%) | **-0.3728** | 776 (28.04%) | 744 (26.89%) | 0.0259 |
| 2018 | 2343 (30.20%) | 1245 (33.10%) | -0.0624 | 883 (31.91%) | 1011 (36.54%) | -0.0976 |
| 2019 | 3363 (43.35%) | 835 (22.20%) | **0.4624** | 814 (29.42%) | 791 (28.59%) | 0.0183 |
| 2020 (Q1) | 696 (8.97%) | 143 (3.80%) | 0.2126 | 221 (7.99%) | 141 (5.10%) | 0.1171 |
| **Inpatient setting** | 975 (12.57%) | 650 (17.28%) | -0.1326 | 509 (18.40%) | 487 (17.60%) | 0.0207 |
| **Elixhauser score** |  |  |  |  |  |  |
| Score ≤ 2 | 2852 (36.76%) | 1602 (42.60%) | -0.1194 | 1108 (40.04%) | 1050 (37.95%) | 0.043 |
| Score 3-4 | 3382 (43.59%) | 1597 (42.46%) | 0.0229 | 1188 (42.93%) | 1243 (44.92%) | -0.0401 |
| Score ≥ 5 | 1524 (19.64%) | 562 (14.94%) | 0.1246 | 471 (17.02%) | 474 (17.13%) | -0.0029 |
| **CHA₂DS₂-VASc mean** |  |  |  |  |  |  |
| Score = 0 | 619 (7.98%) | 360 (9.57%) | -0.0563 | 247 (8.93%) | 230 (8.31%) | 0.0219 |
| Score = 1 | 1575 (20.30%) | 781 (20.77%) | -0.0115 | 601 (21.72%) | 546 (19.73%) | 0.0491 |
| Score ≥ 2 | 5564 (71.72%) | 2620 (69.66%) | 0.0452 | 1919 (69.35%) | 1991 (71.96%) | -0.0572 |
| **Hypertension** | 5542 (71.44%) | 2462 (65.46%) | 0.1288 | 1875 (67.76%) | 1925 (69.57%) | -0.039 |
| **Valvular heart disease** | 1503 (19.37%) | 451 (11.99%) | 0.2041 | 444 (16.05%) | 383 (13.84%) | 0.0619 |
| **Region** |  |  |  |  |  |  |
| Northeast | 954 (12.30%) | 900 (23.93%) | **-0.3056** | 592 (21.40%) | 495 (17.89%) | 0.0883 |
| West | 312 (4.02%) | 655 (17.42%) | **-0.4435** | 254 (9.18%) | 226 (8.17%) | 0.036 |
| Midwest | 1377 (17.75%) | 471 (12.52%) | 0.1462 | 498 (18.00%) | 431 (15.58%) | 0.0648 |
| South | 5115 (65.93%) | 1735 (46.13%) | **0.4071** | 1423 (51.43%) | 1615 (58.37%) | -0.1398 |
| **Hospital size (# beds)** |  |  |  |  |  |  |
| 0-299 | 913 (11.77%) | 150 (3.99%) | **0.2919** | 245 (8.85%) | 149 (5.38%) | 0.1352 |
| 300-499 | 1760 (22.69%) | 1505 (40.02%) | **-0.3802** | 1068 (38.60%) | 1161 (41.96%) | -0.0686 |
| ≥500 | 5085 (65.55%) | 2106 (56.00%) | 0.1965 | 1454 (52.55%) | 1457 (52.66%) | -0.0022 |
| **Volume above median cut-off** | 3972 (51.20%) | 1796 (47.75%) | 0.069 | 1090 (39.39%) | 1174 (42.43%) | -0.0618 |
| **Teaching hospital** | 4169 (53.74%) | 1912 (50.84%) | 0.0581 | 1665 (60.17%) | 1507 (54.46%) | 0.1156 |

Footnotes Data presented as n (%) or mean (±standard deviation). Pre-match SMD values with absolute value >0.25 are bolded. AFA, Arctic Front AdvanceTM catheter; SMD, standardized mean difference; STSF, THERMOCOOL SMARTTOUCH TM SF catheter.

# **Supplemental Table II.** Patient and procedure characteristics for assessment of readmissions, total index admission cost plus 12-month CV-related inpatient admission cost, and total index admission cost plus 12-month AF-related inpatient admission cost

|  | **Pre-Match** | | | **Post-Match** | | |
| --- | --- | --- | --- | --- | --- | --- |
| **Characteristics** | **STSF**  **(n = 4,089)** | **AFA**  **(n = 2,438)** | **SMD** | **STSF**  **(n = 1,781)** | **AFA**  **(n = 1,781)** | **SMD** |
| **Age (years)** | 64.57 (±10.19) | 64.80 (±10.20) | -0.0234 | 64.26 (±10.24) | 64.59 (±10.23) | -0.0328 |
| 18-49 | 322 (7.87%) | 190 (7.79%) | 0.003 | 139 (7.80%) | 139 (7.80%) | 0 |
| 50-59 | 820 (20.05%) | 478 (19.61%) | 0.0112 | 385 (21.62%) | 358 (20.10%) | 0.0373 |
| 60-69 | 1498 (36.63%) | 885 (36.30%) | 0.007 | 668 (37.51%) | 650 (36.50%) | 0.0209 |
| ≥70 | 1449 (35.44%) | 885 (36.30%) | -0.018 | 589 (33.07%) | 634 (35.60%) | -0.0532 |
| **Gender (female)** | 1497 (36.61%) | 969 (39.75%) | -0.0646 | 667 (37.45%) | 691 (38.80%) | -0.0277 |
| **Race (white)** | 3691 (90.27%) | 2297 (94.22%) | -0.1481 | 1623 (91.13%) | 1654 (92.87%) | -0.0642 |
| **Payor** |  |  |  |  |  |  |
| Commercial | 1648 (40.30%) | 934 (38.31%) | 0.0408 | 724 (40.65%) | 697 (39.14%) | 0.031 |
| Medicare | 2193 (53.63%) | 1332 (54.63%) | -0.0201 | 926 (51.99%) | 956 (53.68%) | -0.0337 |
| Medicaid | 114 (2.79%) | 104 (4.27%) | -0.0802 | 70 (3.93%) | 72 (4.04%) | -0.0057 |
| Other | 134 (3.28%) | 68 (2.79%) | 0.0285 | 61 (3.43%) | 56 (3.14%) | 0.0158 |
| **Year** |  |  |  |  |  |  |
| 2016 | 68 (1.66%) | 233 (9.56%) | **-0.3482** | 67 (3.76%) | 84 (4.72%) | -0.0474 |
| 2017 | 1271 (31.08%) | 943 (38.68%) | -0.1599 | 643 (36.10%) | 694 (38.97%) | -0.0592 |
| 2018 | 2205 (53.93%) | 1055 (43.27%) | 0.2143 | 865 (48.57%) | 823 (46.21%) | 0.0472 |
| 2019 | 545 (13.33%) | 207 (8.49%) | 0.1556 | 206 (11.57%) | 180 (10.11%) | 0.047 |
| **Inpatient setting** | 445 (10.88%) | 480 (19.69%) | -0.2466 | 336 (18.87%) | 342 (19.20%) | -0.0086 |
| **Elixhauser score** |  |  |  |  |  |  |
| Score ≤ 2 | 1475 (36.07%) | 1060 (43.48%) | -0.1517 | 760 (42.67%) | 708 (39.75%) | 0.0593 |
| Score 3-4 | 1785 (43.65%) | 1035 (42.45%) | 0.0243 | 747 (41.94%) | 800 (44.92%) | -0.0601 |
| Score ≥ 5 | 829 (20.27%) | 343 (14.07%) | 0.1651 | 274 (15.38%) | 273 (15.33%) | 0.0016 |
| **CHA₂DS₂-VASc mean** |  |  |  |  |  |  |
| Score = 0 | 352 (8.61%) | 241 (9.89%) | -0.0441 | 165 (9.26%) | 167 (9.38%) | -0.0039 |
| Score = 1 | 846 (20.69%) | 513 (21.04%) | -0.0087 | 430 (24.14%) | 370 (20.77%) | 0.0808 |
| Score ≥ 2 | 2891 (70.70%) | 1684 (69.07%) | 0.0355 | 1186 (66.59%) | 1244 (69.85%) | -0.07 |
| **Hypertension** | 2912 (71.22%) | 1574 (64.56%) | 0.1429 | 1145 (64.29%) | 1218 (68.39%) | -0.0868 |
| **Valvular heart disease** | 842 (20.59%) | 302 (12.39%) | 0.2225 | 266 (14.94%) | 235 (13.19%) | 0.0501 |
| **Region** |  |  |  |  |  |  |
| Northeast | 343 (8.39%) | 763 (31.30%) | **-0.5997** | 276 (15.50%) | 268 (15.05%) | 0.0125 |
| West | 188 (4.60%) | 191 (7.83%0 | -0.1344 | 128 (7.19%) | 136 (7.64%) | -0.0171 |
| Midwest | 721 (17.63%) | 398 (16.32%) | 0.0348 | 408 (22.91%) | 346 (19.43%) | 0.0853 |
| South | 2837 (69.38%) | 1086 (44.54%) | **0.5182** | 969 (54.41%) | 1031 (57.89%) | -0.0702 |
| **Hospital size (# beds)** |  |  |  |  |  |  |
| 0-299 | 584 (14.28%) | 127 (5.21%) | **0.3096** | 166 (9.32%) | 127 (7.13%) | 0.0798 |
| 300-499 | 876 (21.42%) | 869 (35.64%) | **-0.3189** | 698 (39.19%) | 722 (40.54%) | -0.0275 |
| ≥500 | 2629 (64.29%) | 1442 (59.15%) | 0.1061 | 917 (51.49%) | 932 (52.33%) | -0.0169 |
| **Volume above median cut-off** | 1949 (47.66%) | 1046 (42.90%) | 0.0957 | 593 (33.30%) | 631 (35.43%) | -0.0449 |
| **Teaching hospital** | 2131 (52.12%) | 1246 (51.11%) | 0.0202 | 1091 (61.26%) | 1045 (58.67%) | 0.0527 |

Data presented as n (%) or mean (±standard deviation). Pre-match SMD values with absolute value >0.25 are bolded. AFA, Arctic Front AdvanceTM catheter; SMD, standardized mean difference; STSF, THERMOCOOL SMARTTOUCH TM SF catheter.

# **Supplemental Table III.** Patient and procedure characteristics for sensitivity analysis

|  | **Pre-Match** | | | **Post-Match** | | |
| --- | --- | --- | --- | --- | --- | --- |
| **Characteristics** | **STSF**  **(n = 2,357)** | **AFA**  **(n = 1,509)** | **SMD** | **STSF**  **(n = 749)** | **AFA**  **(n = 749)** | **SMD** |
| **Age (years)** | 64.89 (10.27) | 65.16 (10.10) | -0.0271 | 63.64 (10.60) | 64.59 (10.29) | -0.0916 |
| 18-49 | 179 (7.59%) | 106 (7.02%) | 0.0219 | 76 (10.15%) | 60 (8.01%) | 0.0744 |
| 50-59 | 455 (19.30%) | 274 (18.16%) | 0.0294 | 145 (19.36%) | 144 (19.23%) | 0.0034 |
| 60-69 | 849 (36.02%) | 567 (37.57%) | -0.0322 | 313 (41.79%) | 283 (37.78%) | 0.0819 |
| ≥70 | 874 (37.08%) | 562 (37.24%) | -0.0034 | 215 (28.70%) | 262 (34.98%) | -0.135 |
| **Gender (female)** | 882 (37.42%) | 593 (39.30%) | -0.0386 | 279 (37.25%) | 282 (37.65%) | -0.0083 |
| **Race (white)** | 2140 (90.79%) | 1428 (94.63%) | -0.1481 | 683 (91.19%) | 689 (91.99%) | -0.0289 |
| **Payor** |  |  |  |  |  |  |
| Commercial | 882 (37.42%) | 555 (36.78%) | 0.0133 | 305 (40.72%) | 274 (36.58%) | 0.0851 |
| Medicare | 1330 (56.43%) | 841 (55.73%) | 0.014 | 374 (49.93%) | 419 (55.94%) | -0.1206 |
| Medicaid | 60 (2.55%) | 63 (4.17%) | -0.0905 | 33 (4.41%) | 29 (3.87%) | 0.0268 |
| Other | 85 (3.61%) | 50 (3.31%) | 0.016 | 37 (4.94%) | 27 (3.60%) | 0.0661 |
| **Year** |  |  |  |  |  |  |
| 2016 | 40 (1.70%) | 132 (8.75%) | **-0.321** | 38 (5.07%) | 41 (5.47%) | -0.0179 |
| 2017 | 694 (29.44%) | 510 (33.80%) | -0.0937 | 276 (36.85%) | 231 (30.84%) | 0.1272 |
| 2018 | 1285 (54.52%) | 705 (46.72%) | 0.1565 | 314 (41.92%) | 365 (48.73%) | -0.1371 |
| 2019 | 338 (14.34%) | 162 (10.74%) | 0.109 | 121 (16.15%) | 112 (14.95%) | 0.0332 |
| **Inpatient setting** | 161 (6.83%) | 292 (19.35%) | **-0.3777** | 142 (18.96%) | 137 (18.29%) | 0.0171 |
| **Elixhauser score** |  |  |  |  |  |  |
| Score ≤ 2 | 835 (35.43%) | 658 (43.61%) | -0.1679 | 302 (40.32%) | 292 (38.99%) | 0.0273 |
| Score 3-4 | 1020 (43.28%) | 643 (42.61%) | 0.0134 | 327 (43.66%) | 318 (42.46%) | 0.0243 |
| Score ≥ 5 | 502 (21.30%) | 208 (13.78%) | 0.1986 | 120 (16.02%) | 139 (18.56%) | -0.0671 |
| **CHA₂DS₂-VASc mean** |  |  |  |  |  |  |
| Score = 0 | 189 (8.02%) | 143 (9.48%) | -0.0516 | 71 (9.48%) | 63 (8.41%) | 0.0374 |
| Score = 1 | 475 (20.15%) | 302 (20.01%) | 0.0035 | 187 (24.97%) | 157 (20.96%) | 0.0953 |
| Score ≥ 2 | 1693 (71.83%) | 1064 (70.51%) | 0.0291 | 491 (65.55%) | 529 (70.63%) | -0.109 |
| **Hypertension** | 1699 (72.08%) | 968 (64.15%) | 0.1709 | 489 (65.29%) | 507 (67.69%) | -0.0509 |
| **Valvular heart disease** | 538 (22.83%) | 188 (12.46%) | **0.2745** | 89 (11.88%) | 77 (10.28%) | 0.0511 |
| **Region** |  |  |  |  |  |  |
| Northeast | 165 (7.00%) | 676 (44.80%) | **-0.9564** | 160 (21.36%) | 177 (23.63%) | -0.0544 |
| West | 11 (0.47%) | 92 (6.10%) | **-0.32** | 11 (1.47%) | 28 (3.74%) | -0.1429 |
| Midwest | 193 (8.19%) | 241 (15.97%) | -0.2405 | 183 (24.43%) | 131 (17.49%) | 0.1712 |
| South | 1988 (84.34%) | 500 (33.13%) | **1.2179** | 395 (52.74%) | 413 (55.14%) | -0.0482 |
| **Hospital size (# beds)** |  |  |  |  |  |  |
| 0-299 | 6 (0.25%) | 1 (0.07%) | 0.0471 | 2 (0.27%) | 1 (0.13%) | 0.0299 |
| 300-499 | 403 (17.10%) | 373 (24.72%) | -0.1882 | 298 (39.79%) | 274 (36.58%) | 0.066 |
| ≥500 | 1948 (82.65%) | 1135 (75.22%) | 0.183 | 449 (59.95%) | 474 (63.28%) | -0.0687 |
| **Teaching hospital** | 1153 (48.92%) | 842 (55.80%) | -0.1381 | 588 (78.50%) | 565 (75.43%) | 0.073 |

Data presented as n (%) or mean (±standard deviation). Pre-match SMD values with absolute value >0.25 are bolded. AFA, Arctic Front AdvanceTM catheter; SMD, standardized mean difference; STSF, THERMOCOOL SMARTTOUCH TM SF catheter.

**Appendix I.** Diagnosis and procedure codes for study attrition and outcomes.

Atrial Fibrillation:

| **Code Type** | **Code** | **Description** |
| --- | --- | --- |
| ICD 10 | I48.0 | PAROXYSMAL ATRIAL FIBRILLATION |
| ICD 10 | I48.1 | PERSISTENT ATRIAL FIBRILLATION |
| ICD 10 | I48.2 | CHR ATRIAL FIBRILLATION |
| ICD 10 | I48.91 | UNSP ATRIAL FIBRILLATION |

Ablation (for atrial fibrillation)

| **Code Type** | **Code** | **Description** |
| --- | --- | --- |
| ICD 10 | 02553ZZ | DESTRUCTION OF ATRIAL SEPTUM PA |
| ICD 10 | 02563ZZ | DESTRUCTION OF RIGHT ATRIUM PA |
| ICD 10 | 02573ZZ | DESTRUCTION OF LEFT ATRIUM PA |
| ICD 10 | 02583ZZ | DESTRUCTION OF CONDUCTN MECHANSM PA |
| ICD 10 | 025K3ZZ | DESTRUCTION OF RIGHT VENTRICLE PA |
| ICD 10 | 025L3ZZ | DESTRUCTION OF LEFT VENTRICLE PA |
| ICD 10 | 025M3ZZ | DESTRUCTION VENTRICULAR SEPTUM PA |
| ICD 10 | 025S3ZZ | DESTRUCTION RIGHT PULMONARY VEIN PA |
| ICD 10 | 025T3ZZ | DESTRUCTION LEFT PULMONARY VEIN PA |

Surgical Ablation

| **Code Type** | **Code** | **Description** |
| --- | --- | --- |
| ICD 10 | 02550ZZ | DESTRUCTION OF ATRIAL SEPTUM OA |
| ICD 10 | 02554ZZ | DESTRUCTION OF ATRIAL SEPTUM PE |
| ICD 10 | 02560ZZ | DESTRUCTION OF RIGHT ATRIUM OA |
| ICD 10 | 02564ZZ | DESTRUCTION OF RIGHT ATRIUM PE |
| ICD 10 | 02570ZZ | DESTRUCTION OF LEFT ATRIUM OA |
| ICD 10 | 02574ZZ | DESTRUCTION OF LEFT ATRIUM PE |
| ICD 10 | 02580ZZ | DESTRUCTION OF CONDUCTN MECHANSM OA |
| ICD 10 | 02584ZZ | DESTRUCTION CONDUCTN MECHANSM PE |
| ICD 10 | 02590ZZ | DESTRUCTION OF CHORDAE TENDINEAE OA |
| ICD 10 | 02594ZZ | DESTRUCTION CHORDAE TENDINEAE PE |
| ICD 10 | 025F0ZZ | DESTRUCTION OF AORTIC VALVE OA |
| ICD 10 | 025F4ZZ | DESTRUCTION OF AORTIC VALVE PE |
| ICD 10 | 025G0ZZ | DESTRUCTION OF MITRAL VALVE OA |
| ICD 10 | 025G4ZZ | DESTRUCTION OF MITRAL VALVE PE |
| ICD 10 | 025H0ZZ | DESTRUCTION OF PULMONARY VALVE OA |
| ICD 10 | 025H4ZZ | DEST PULMONARY VALVE PE |
| ICD 10 | 025J0ZZ | DESTRUCTION OF TRICUSPID VALVE OA |
| ICD 10 | 025J4ZZ | DESTRUCTION OF TRICUSPID VALVE PE |
| ICD 10 | 025K0ZZ | DESTRUCTION OF RIGHT VENTRICLE OA |
| ICD 10 | 025K4ZZ | DESTRUCTION OF RIGHT VENTRICLE PE |
| ICD 10 | 025L0ZZ | DESTRUCTION OF LEFT VENTRICLE OA |
| ICD 10 | 025L4ZZ | DEST OF LEFT VENTRICLE PE |
| ICD 10 | 025M0ZZ | DESTRUCTION VENTRICULAR SEPTUM OA |
| ICD 10 | 025M4ZZ | DESTRUCTION VENTRICULAR SEPTUM PE |
| ICD 10 | 02B50ZZ | EXCISION ATRIAL SEPT OA |
| ICD 10 | 02B54ZZ | EXCISION ATRIAL SEPT PE |
| ICD 10 | 02B60ZZ | EXCISION R ATRM OA |
| ICD 10 | 02B64ZZ | EXCISION R ATRM PE |
| ICD 10 | 02B70ZZ | EXCISION L ATRM OA |
| ICD 10 | 02B74ZZ | EXCISION L ATRM PE |
| ICD 10 | 02B80ZZ | EXCISION CONDCT MECHSM OA |
| ICD 10 | 02B84ZZ | EXCISION CONDCT MECHSM PE |
| ICD 10 | 02B90ZZ | EXCISION CHOR TEND OA |
| ICD 10 | 02B94ZZ | EXCISION CHOR TEND PE |
| ICD 10 | 02BF0ZZ | EXCISION AORT VLV OA |
| ICD 10 | 02BF4ZZ | EXCISION AORT VLV PE |
| ICD 10 | 02BG0ZZ | EXCISION MITRAL VLV OA |
| ICD 10 | 02BG4ZZ | EXCISION MITRAL VLV PE |
| ICD 10 | 02BH0ZZ | EXCISION PULM VLV OA |
| ICD 10 | 02BH4ZZ | EXCISION PULM VLV PE |
| ICD 10 | 02BJ0ZZ | EXCISION TRICUS VLV OA |
| ICD 10 | 02BJ4ZZ | EXCISION TRICUS VLV PE |
| ICD 10 | 02BK0ZZ | EXCISION R VENT OA |
| ICD 10 | 02BK4ZZ | EXCISION R VENT PE |
| ICD 10 | 02BL0ZZ | EXCISION L VENT OA |
| ICD 10 | 02BL4ZZ | EXCISION L VENT PE |
| ICD 10 | 02BM0ZZ | EXCISION VENTRICULAR SEPT OA |
| ICD 10 | 02BM4ZZ | EXCISION VENTRICULAR SEPT PE |
| ICD 10 | 02T80ZZ | RECT CONDCT MECHSM OA |
| ICD 10 | 02T84ZZ | RECT CONDCT MECHSM PE |
| CPT | 33250 | OP ABLAT SUPRAVENT FOCUS;NO CP BYPS |
| CPT | 33251 | OP ABLAT SUPRAVENT FOCUS; W/CP BYPS |
| CPT | 33253 | OP INCI&RECON ATRIA TX FIB/FLUTTER |
| CPT | 33254 | ABLATE ATRIA LMTD |
| CPT | 33255 | ABLATE ATRIA W/O BYPASS EXT |
| CPT | 33256 | ABLATE ATRIA W/BYPASS EXTEN |
| CPT | 33257 | ABLATE ATRIA LMTD ADD-ON |
| CPT | 33258 | ABLATE ATRIA X10SV ADD-ON |
| CPT | 33259 | ABLATE ATRIA W/BYPASS ADD-ON |
| CPT | 33261 | OP ABLAT VENT ARRHYTH FOCUS W/BYPS |
| CPT | 33265 | ABLATE ATRIA LMTD ENDO |
| CPT | 33266 | ABLATE ATRIA X10SV ENDO |

Valvular Procedure

| **Code Type** | **Code** | **Description** |
| --- | --- | --- |
| ICD 10 | 021608P | BYP R ATRM TO PULM TRNK W ZOOPLS TISS OA |
| ICD 10 | 021608Q | BYP R ATRM TO R PULM ART ZOOPLS TISS OA |
| ICD 10 | 021608R | BYP R ATRM TO L PULM ART ZOOPLS TISS OA |
| ICD 10 | 021609P | BYP R ATRM TO PULM TRNK AUTOL VENOUS OA |
| ICD 10 | 021609Q | BYP R ATRM TO R PULM ART AUTOL VENOUS OA |
| ICD 10 | 021609R | BYP R ATRM TO L PULM ART AUTOL VENOUS OA |
| ICD 10 | 02160AP | BYP R ATRM TO PULM TRNK AUTOL ART OA |
| ICD 10 | 02160AQ | BYP R ATRM TO R PULM ART AUTOL ART OA |
| ICD 10 | 02160AR | BYP R ATRM TO L PULM ART AUTOL ART OA |
| ICD 10 | 02160JP | BYP R ATRM TO PULM TRNK SYN OA |
| ICD 10 | 02160JQ | BYP R ATRM TO R PULM ART SYN OA |
| ICD 10 | 02160JR | BYP R ATRM TO L PULM ART SYN OA |
| ICD 10 | 02160KP | BYP R ATRM TO PULM TRNK NONAUT TISS OA |
| ICD 10 | 02160KQ | BYP R ATRM TO R PULM ART NONAUT TISS OA |
| ICD 10 | 02160KR | BYP R ATRM TO L PULM ART NONAUT TISS OA |
| ICD 10 | 02160ZP | BYP R ATRM TO PULM TRNK OA |
| ICD 10 | 02160ZQ | BYP R ATRM TO R PULM ART OA |
| ICD 10 | 02160ZR | BYP R ATRM TO L PULM ART OA |
| ICD 10 | 021648P | BYP R ATRM TO PULM TRNK ZOOPLS PE |
| ICD 10 | 021648Q | BYP R ATRM TO R PULM ART ZOOPLS PE |
| ICD 10 | 021648R | BYP R ATRM TO L PULM ART ZOOPLS PE |
| ICD 10 | 021649P | BYP R ATRM/PULM TRNK AUTOL VEN PE |
| ICD 10 | 021649Q | BYP R ATRM/R PULM ART AUTOL VEN PE |
| ICD 10 | 021649R | BYP R ATRM/L PULM ART AUTOL VEN PE |
| ICD 10 | 02164AP | BYP R ATRM/PULM TRNK AUTOL ART PE |
| ICD 10 | 02164AQ | BYP R ATRM/R PULM ART AUTOL ART PE |
| ICD 10 | 02164AR | BYP R ATRM/L PULM ART AUTOL ART PE |
| ICD 10 | 02164JP | BYP R ATRM/PULM TRNK SYN SUB PE |
| ICD 10 | 02164JQ | BYP R ATRM/R PULM ART SYN PE |
| ICD 10 | 02164JR | BYP R ATRM/L PULM ART SYN PE |
| ICD 10 | 02164KP | BYP R ATRM/PULM TRNK NONAUT PE |
| ICD 10 | 02164KQ | BYP R ATRM/R PULM ART NONAUT PE |
| ICD 10 | 02164KR | BYP R ATRM/L PULM ART NONAUT PE |
| ICD 10 | 02164ZP | BYP R ATRM TO PULM TRNK PE |
| ICD 10 | 02164ZQ | BYP R ATRM TO R PULM ART PE |
| ICD 10 | 02164ZR | BYP R ATRM TO L PULM ART PE |
| ICD 10 | 021708P | BYP L ATRM TO PULM TRNK W ZOOPLS TISS OA |
| ICD 10 | 021708Q | BYP L ATRM TO R PULM ART ZOOPLS TISS OA |
| ICD 10 | 021708R | BYP L ATRM TO L PULM ART ZOOPLS TISS OA |
| ICD 10 | 021708S | BYP L ATRM TO R PULM VN W ZOOPLS TISS OA |
| ICD 10 | 021708T | BYP L ATRM TO L PULM VN W ZOOPLS TISS OA |
| ICD 10 | 021708U | BYP L ATRM TO PULM VN CONFLU ZOOPLS OA |
| ICD 10 | 021709P | BYP L ATRM/PULM TRNK AUTOL VEN TISS OA |
| ICD 10 | 021709Q | BYP L ATRM/R PULM ART AUTOL VEN TISS OA |
| ICD 10 | 021709R | BYP L ATRM/L PULM ART AUTOL VEN TISS OA |
| ICD 10 | 021709S | BYP L ATRM/R PULM VN AUTOL VEN TISS OA |
| ICD 10 | 021709T | BYP L ATRM/L PULM VN AUTOL VEN TISS OA |
| ICD 10 | 021709U | BYP L ATRM/PULM VN CONFLU AUTOL VEN OA |
| ICD 10 | 02170AP | BYP L ATRM/PULM TRNK AUTOL OA |
| ICD 10 | 02170AQ | BYP L ATRM/R PULM ART AUTOL ART TISS OA |
| ICD 10 | 02170AR | BYP L ATRM/L PULM ART AUTOL ART TISS OA |
| ICD 10 | 02170AS | BYP L ATRM/R PULM VN AUTOL OA |
| ICD 10 | 02170AT | BYP L ATRM/L PULM VN AUTOL OA |
| ICD 10 | 02170AU | BYP L ATRM/PULM VN CONFLU AUTOL ART OA |
| ICD 10 | 02170JP | BYP L ATRM TO PULM TRNK SYN OA |
| ICD 10 | 02170JQ | BYP L ATRM TO R PULM ART SYN OA |
| ICD 10 | 02170JR | BYP L ATRM TO L PULM ART SYN OA |
| ICD 10 | 02170JS | BYP L ATRM TO R PULM VN SYN OA |
| ICD 10 | 02170JT | BYP L ATRM TO L PULM VN SYN OA |
| ICD 10 | 02170JU | BYP L ATRM/PULM VN CONFLU SYN OA |
| ICD 10 | 02170KP | BYP L ATRM/PULM TRNK NONAUT TISS SUB OA |
| ICD 10 | 02170KQ | BYP L ATRM/R PULM ART NONAUT TISS SUB OA |
| ICD 10 | 02170KR | BYP L ATRM/L PULM ART NONAUT TISS SUB OA |
| ICD 10 | 02170KS | BYP L ATRM/R PULM VN NONAUT TISS SUB OA |
| ICD 10 | 02170KT | BYP L ATRM/L PULM VN NONAUT TISS SUB OA |
| ICD 10 | 02170KU | BYP L ATRM/PULM VN CONFLU NONAUT OA |
| ICD 10 | 02170ZP | BYP L ATRM TO PULM TRNK OA |
| ICD 10 | 02170ZQ | BYP L ATRM TO R PULM ART OA |
| ICD 10 | 02170ZR | BYP L ATRM TO L PULM ART OA |
| ICD 10 | 02170ZS | BYP L ATRM TO R PULM VN OA |
| ICD 10 | 02170ZT | BYP L ATRM TO L PULM VN OA |
| ICD 10 | 02170ZU | BYP L ATRM TO PULM VN CONFLU OA |
| ICD 10 | 021748P | BYP L ATRM/PULM TRNK ZOOPLS PE |
| ICD 10 | 021748Q | BYP L ATRM/R PULM ART ZOOPLS PE |
| ICD 10 | 021748R | BYP L ATRM/L PULM ART ZOOPLS PE |
| ICD 10 | 021748S | BYP L ATRM/R PULM VN ZOOPLS PE |
| ICD 10 | 021748T | BYP L ATRM/L PULM VN ZOOPLS PE |
| ICD 10 | 021748U | BYP L ATRM/PULM VN CONFLU ZOOPLS PE |
| ICD 10 | 021749P | BYP L ATRM/PULM TRNK AUTOL VEN PE |
| ICD 10 | 021749Q | BYP L ATRM/R PULM ART AUTOL VEN PE |
| ICD 10 | 021749R | BYP L ATRM/L PULM ART AUTOL VEN PE |
| ICD 10 | 021749S | BYP L ATRM/R PULM VN AUTOL VEN PE |
| ICD 10 | 021749T | BYP L ATRM/L PULM VN AUTOL VEN PE |
| ICD 10 | 021749U | BYP L ATRM/PULM VN AUTOL VEN PE |
| ICD 10 | 02174AP | BYP L ATRM/PULM TRNK AUTOL ART PE |
| ICD 10 | 02174AQ | BYP L ATRM/R PULM ART AUTOL ART PE |
| ICD 10 | 02174AR | BYP L ATRM/L PULM ART AUTOL ART PE |
| ICD 10 | 02174AS | BYP L ATRM/R PULM VN AUTOL ART PE |
| ICD 10 | 02174AT | BYP L ATRM/L PULM VN AUTOL ART PE |
| ICD 10 | 02174AU | BYP L ATRM/PULM VN AUTOL ART PE |
| ICD 10 | 02174JP | BYP L ATRM/PULM TRNK SYN SUB PE |
| ICD 10 | 02174JQ | BYP L ATRM/R PULM ART SYN PE |
| ICD 10 | 02174JR | BYP L ATRM/L PULM ART SYN PE |
| ICD 10 | 02174JS | BYP L ATRM/R PULM VN SYN SUB PE |
| ICD 10 | 02174JT | BYP L ATRM/L PULM VN SYN SUB PE |
| ICD 10 | 02174JU | BYP L ATRM/PULM VN SYN SUB PE |
| ICD 10 | 02174KP | BYP L ATRM/PULM TRNK NONAUT PE |
| ICD 10 | 02174KQ | BYP L ATRM/R PULM ART NONAUT PE |
| ICD 10 | 02174KR | BYP L ATRM/L PULM ART NONAUT PE |
| ICD 10 | 02174KS | BYP L ATRM/R PULM VN NONAUT PE |
| ICD 10 | 02174KT | BYP L ATRM/L PULM VN NONAUT PE |
| ICD 10 | 02174KU | BYP L ATRM/PULM VN NONAUT TISS PE |
| ICD 10 | 02174ZP | BYP L ATRM TO PULM TRNK PE |
| ICD 10 | 02174ZQ | BYP L ATRM TO R PULM ART PE |
| ICD 10 | 02174ZR | BYP L ATRM TO L PULM ART PE |
| ICD 10 | 02174ZS | BYP L ATRM TO R PULM VN PE |
| ICD 10 | 02174ZT | BYP L ATRM TO L PULM VN PE |
| ICD 10 | 02174ZU | BYP L ATRM TO PULM VN CONFLU PE |
| ICD 10 | 021K08P | BYP R VENT TO PULM TRNK W ZOOPLS TISS OA |
| ICD 10 | 021K08Q | BYP R VENT TO R PULM ART ZOOPLS TISS OA |
| ICD 10 | 021K08R | BYP R VENT TO L PULM ART ZOOPLS TISS OA |
| ICD 10 | 021K09P | BYP R VENT/PULM TRNK W AUTOL VEN TISS OA |
| ICD 10 | 021K09Q | BYP R VENT/R PULM ART AUTOL VEN TISS OA |
| ICD 10 | 021K09R | BYP R VENT/L PULM ART AUTOL VEN TISS OA |
| ICD 10 | 021K0AP | BYP R VENT/PULM TRNK AUTOL ART OA |
| ICD 10 | 021K0AQ | BYP R VENT/R PULM ART AUTOL ART TISS OA |
| ICD 10 | 021K0AR | BYP R VENT/L PULM ART AUTOL ART TISS OA |
| ICD 10 | 021K0JP | BYP R VENT TO PULM TRNK SYN OA |
| ICD 10 | 021K0JQ | BYP R VENT TO R PULM ART SYN OA |
| ICD 10 | 021K0JR | BYP R VENT TO L PULM ART SYN OA |
| ICD 10 | 021K0KP | BYP R VENT/PULM TRNK NONAUT TISS SUB OA |
| ICD 10 | 021K0KQ | BYP R VENT/R PULM ART NONAUT TISS SUB OA |
| ICD 10 | 021K0KR | BYP R VENT/L PULM ART NONAUT TISS SUB OA |
| ICD 10 | 021K0ZP | BYP R VENT TO PULM TRNK OA |
| ICD 10 | 021K0ZQ | BYP R VENT TO R PULM ART OA |
| ICD 10 | 021K0ZR | BYP R VENT TO L PULM ART OA |
| ICD 10 | 021K48P | BYP R VENT/PULM TRNK ZOOPLS PE |
| ICD 10 | 021K48Q | BYP R VENT/R PULM ART ZOOPLS PE |
| ICD 10 | 021K48R | BYP R VENT/L PULM ART ZOOPLS PE |
| ICD 10 | 021K49P | BYP R VENT/PULM TRNK AUTOL VEN PE |
| ICD 10 | 021K49Q | BYP R VENT/R PULM ART AUTOL VEN PE |
| ICD 10 | 021K49R | BYP R VENT/L PULM ART AUTOL VEN PE |
| ICD 10 | 021K4AP | BYP R VENT/PULM TRNK AUTOL ART PE |
| ICD 10 | 021K4AQ | BYP R VENT/R PULM ART AUTOL ART PE |
| ICD 10 | 021K4AR | BYP R VENT/L PULM ART AUTOL ART PE |
| ICD 10 | 021K4JP | BYP R VENT/PULM TRNK SYN SUB PE |
| ICD 10 | 021K4JQ | BYP R VENT/R PULM ART SYN PE |
| ICD 10 | 021K4JR | BYP R VENT/L PULM ART SYN PE |
| ICD 10 | 021K4KP | BYP R VENT/PULM TRNK W NONAUT PE |
| ICD 10 | 021K4KQ | BYP R VENT/R PULM ART NONAUT PE |
| ICD 10 | 021K4KR | BYP R VENT/L PULM ART NONAUT PE |
| ICD 10 | 021K4ZP | BYP R VENT TO PULM TRNK PE |
| ICD 10 | 021K4ZQ | BYP R VENT TO R PULM ART PE |
| ICD 10 | 021K4ZR | BYP R VENT TO L PULM ART PE |
| ICD 10 | 021L0ZW | BYP L VENT TO AORT OA |
| ICD 10 | 021L4ZW | BYP L VENT TO AORT PE |
| ICD 10 | 021V08S | BYP SVC TO R PULM VN W ZOOPLS TISS OA |
| ICD 10 | 021V08T | BYP SVC TO L PULM VN W ZOOPLS TISS OA |
| ICD 10 | 021V08U | BYP SVC TO PULM VN CONFLU ZOOPLS TISS OA |
| ICD 10 | 021V09S | BYP SVC TO R PULM VN W AUTOL VENOUS OA |
| ICD 10 | 021V09T | BYP SVC TO L PULM VN W AUTOL VENOUS OA |
| ICD 10 | 021V09U | BYP SVC TO PULM VN CONFLU W AUTOL VEN OA |
| ICD 10 | 021V0AS | BYP SVC TO R PULM VN AUTOL ART OA |
| ICD 10 | 021V0AT | BYP SVC TO L PULM VN AUTOL ART OA |
| ICD 10 | 021V0AU | BYP SVC TO PULM VN CONFLU W AUTOL ART OA |
| ICD 10 | 021V0JS | BYP SVC TO R PULM VN SYN OA |
| ICD 10 | 021V0JT | BYP SVC TO L PULM VN SYN OA |
| ICD 10 | 021V0JU | BYP SVC TO PULM VN CONFLU SYN OA |
| ICD 10 | 021V0KS | BYP SVC TO R PULM VN NONAUT TISS SUB OA |
| ICD 10 | 021V0KT | BYP SVC TO L PULM VN NONAUT TISS SUB OA |
| ICD 10 | 021V0KU | BYP SVC TO PULM VN CONFLU W NONAUT OA |
| ICD 10 | 021V0ZS | BYP SVC TO R PULM VN OA |
| ICD 10 | 021V0ZT | BYP SVC TO L PULM VN OA |
| ICD 10 | 021V0ZU | BYP SVC TO PULM VN CONFLU OA |
| ICD 10 | 021V48S | BYP SVC TO R PULM VN W ZOOPLS PE |
| ICD 10 | 021V48T | BYP SVC TO L PULM VN W ZOOPLS PE |
| ICD 10 | 021V48U | BYP SVC TO L PULM VN CONFLU ZOOPLS PE |
| ICD 10 | 021V49S | BYP SVC TO R PULM VN AUTOL VEN PE |
| ICD 10 | 021V49T | BYP SVC TO L PULM VN AUTOL VEN PE |
| ICD 10 | 021V49U | BYP SVC TO PULM VN CONFLU AUTOL PE |
| ICD 10 | 021V4AS | BYP SVC TO R PULM VN AUTOL ART PE |
| ICD 10 | 021V4AT | BYP SVC TO L PULM VN AUTOL ART PE |
| ICD 10 | 021V4AU | BYP SVC TO PULM VN CONFLU AUTOL PE |
| ICD 10 | 021V4JS | BYP SVC TO R PULM VN W SYN PE |
| ICD 10 | 021V4JT | BYP SVC TO L PULM VN W SYN PE |
| ICD 10 | 021V4JU | BYP SVC TO PULM VN CONFLU SYN PE |
| ICD 10 | 021V4KS | BYP SVC TO R PULM VN W NONAUT PE |
| ICD 10 | 021V4KT | BYP SVC TO L PULM VN W NONAUT PE |
| ICD 10 | 021V4KU | BYP SVC TO PULM VN CONFLU NONAUT PE |
| ICD 10 | 021V4ZS | BYP SVC TO R PULM VN PE |
| ICD 10 | 021V4ZT | BYP SVC TO L PULM VN PE |
| ICD 10 | 021V4ZU | BYP SVC TO PULM VN CONFLU PE |
| ICD 10 | 024F07J | CREAT AORT VLV FR TRNK VLV AUTOL OA |
| ICD 10 | 024F08J | CREAT AORT VLV FR TRNK VLV ZOOPLS OA |
| ICD 10 | 024F0JJ | CREAT AORT VLV FR TRNK VLV SYN OA |
| ICD 10 | 024F0KJ | CREAT AORT VLV FR TRNK VLV NONAUT OA |
| ICD 10 | 024G072 | CREAT MITRAL VLV COMN ATRIV VLV AUTOL OA |
| ICD 10 | 024G082 | CREAT MITRAL VLV COMN ATRIV VLV ZOOPLSOA |
| ICD 10 | 024G0J2 | CREAT MITRAL VLV COMN ATRIV VLV SYN OA |
| ICD 10 | 024G0K2 | CREAT MITRALVLV COMN ATRIV VLV NONAUT OA |
| ICD 10 | 024J072 | CREAT TRICUS VLV COMN ATRIV VLV AUTOL OA |
| ICD 10 | 024J082 | CREAT TRICUS VLV COMN ATRIV ZOOPLS OA |
| ICD 10 | 024J0J2 | CREAT TRICUS VLV COMN ATRIV VLV SYN OA |
| ICD 10 | 024J0K2 | CREAT TRICUSVLV COMN ATRIV VLV NONAUT OA |
| ICD 10 | 02590ZZ | DESTRUCTION OF CHORDAE TENDINEAE OA |
| ICD 10 | 02593ZZ | DESTRUCTION OF CHORDAE TENDINEAE PA |
| ICD 10 | 02594ZZ | DESTRUCTION CHORDAE TENDINEAE PE |
| ICD 10 | 025D0ZZ | DESTRUCTION OF PAPILLARY MUSCLE OA |
| ICD 10 | 025D3ZZ | DESTRUCTION OF PAPILLARY MUSCLE PA |
| ICD 10 | 025D4ZZ | DESTRUCTION PAPILLARY MUSCLE PE |
| ICD 10 | 027F04Z | DLT AORT VLV W DRG-ELUT INTRLUM OA |
| ICD 10 | 027F0DZ | DLT AORT VLV W INTRLUM OA |
| ICD 10 | 027F0ZZ | DLT AORT VLV OA |
| ICD 10 | 027F34Z | DLT AORT VLV DRG-ELUT INTRLUM PA |
| ICD 10 | 027F3DZ | DLT AORT VLV W INTRLUM PA |
| ICD 10 | 027F3ZZ | DLT AORT VLV PA |
| ICD 10 | 027F44Z | DLT AORT VLV W DRG-ELUT DEV PE |
| ICD 10 | 027F4DZ | DLT AORT VLV W INTRLUM PE |
| ICD 10 | 027F4ZZ | DLT AORT VLV PE |
| ICD 10 | 027G04Z | DLT MITRAL VLV DRG-ELUT INTRLUM OA |
| ICD 10 | 027G0DZ | DLT MITRAL VLV W INTRLUM OA |
| ICD 10 | 027G0ZZ | DLT MITRAL VLV OA |
| ICD 10 | 027G34Z | DLT MITRAL VLV W DRG-ELUT DEV PA |
| ICD 10 | 027G3DZ | DLT MITRAL VLV W INTRLUM PA |
| ICD 10 | 027G3ZZ | DLT MITRAL VLV PA |
| ICD 10 | 027G44Z | DLT MITRAL VLV DRG-ELUT DEV PE |
| ICD 10 | 027G4DZ | DLT MITRAL VLV W INTRLUM PE |
| ICD 10 | 027G4ZZ | DLT MITRAL VLV PE |
| ICD 10 | 027H04Z | DLT PULM VLV DRG-ELUT INTRLUM OA |
| ICD 10 | 027H0DZ | DLT PULM VLV W INTRLUM OA |
| ICD 10 | 027H0ZZ | DLT PULM VLV OA |
| ICD 10 | 027H34Z | DLT PULM VLV DRG-ELUT INTRLUM PA |
| ICD 10 | 027H3DZ | DLT PULM VLV W INTRLUM PA |
| ICD 10 | 027H3ZZ | DLT PULM VLV PA |
| ICD 10 | 027H44Z | DLT PULM VLV DRG-ELUT DEV PE |
| ICD 10 | 027H4DZ | DLT PULM VLV W INTRLUM PE |
| ICD 10 | 027H4ZZ | DLT PULM VLV PE |
| ICD 10 | 027J04Z | DLT TRICUS VLV DRG-ELUT INTRLUM OA |
| ICD 10 | 027J0DZ | DLT TRICUS VLV W INTRLUM OA |
| ICD 10 | 027J0ZZ | DLT TRICUS VLV OA |
| ICD 10 | 027J34Z | DLT TRICUS VLV W DRG-ELUT DEV PA |
| ICD 10 | 027J3DZ | DLT TRICUS VLV W INTRLUM PA |
| ICD 10 | 027J3ZZ | DLT TRICUS VLV PA |
| ICD 10 | 027J44Z | DLT TRICUS VLV DRG-ELUT DEV PE |
| ICD 10 | 027J4DZ | DLT TRICUS VLV W INTRLUM PE |
| ICD 10 | 027J4ZZ | DLT TRICUS VLV PE |
| ICD 10 | 02890ZZ | DIVISION CHOR TEND OA |
| ICD 10 | 02893ZZ | DIVISION CHOR TEND PA |
| ICD 10 | 02894ZZ | DIVISION CHOR TEND PE |
| ICD 10 | 028D0ZZ | DIVISION PAPILLARY MSL OA |
| ICD 10 | 028D3ZZ | DIVISION PAPILLARY MSL PA |
| ICD 10 | 028D4ZZ | DIVISION PAPILLARY MSL PE |
| ICD 10 | 02B50ZZ | EXCISION ATRIAL SEPT OA |
| ICD 10 | 02B53ZZ | EXCISION ATRIAL SEPT PA |
| ICD 10 | 02B54ZZ | EXCISION ATRIAL SEPT PE |
| ICD 10 | 02B90ZX | EXCISION CHOR TEND OA DX |
| ICD 10 | 02B90ZZ | EXCISION CHOR TEND OA |
| ICD 10 | 02B93ZX | EXCISION CHOR TEND PA DX |
| ICD 10 | 02B93ZZ | EXCISION CHOR TEND PA |
| ICD 10 | 02B94ZX | EXCISION CHOR TEND PE DX |
| ICD 10 | 02B94ZZ | EXCISION CHOR TEND PE |
| ICD 10 | 02BD0ZZ | EXCISION PAPILLARY MSL OA |
| ICD 10 | 02BD3ZZ | EXCISION PAPILLARY MSL PA |
| ICD 10 | 02BD4ZZ | EXCISION PAPILLARY MSL PE |
| ICD 10 | 02BK0ZX | EXCISION R VENT OA DX |
| ICD 10 | 02BK0ZZ | EXCISION R VENT OA |
| ICD 10 | 02BK3ZX | EXCISION R VENT PA DX |
| ICD 10 | 02BK3ZZ | EXCISION R VENT PA |
| ICD 10 | 02BK4ZX | EXCISION R VENT PE DX |
| ICD 10 | 02BK4ZZ | EXCISION R VENT PE |
| ICD 10 | 02BL0ZX | EXCISION L VENT OA DX |
| ICD 10 | 02BL0ZZ | EXCISION L VENT OA |
| ICD 10 | 02BL3ZX | EXCISION L VENT PA DX |
| ICD 10 | 02BL3ZZ | EXCISION L VENT PA |
| ICD 10 | 02BL4ZX | EXCISION L VENT PE DX |
| ICD 10 | 02BL4ZZ | EXCISION L VENT PE |
| ICD 10 | 02C50ZZ | EXTIR MATR ATRIAL SEPT OA |
| ICD 10 | 02C53ZZ | EXTIR MATR ATRIAL SEPT PA |
| ICD 10 | 02C54ZZ | EXTIR MATR ATRIAL SEPT PE |
| ICD 10 | 02C90ZZ | EXTIR MATR CHOR TEND OA |
| ICD 10 | 02C93ZZ | EXTIR MATR CHOR TEND PA |
| ICD 10 | 02C94ZZ | EXTIR MATR CHOR TEND PE |
| ICD 10 | 02CD0ZZ | EXTIR MATR PAPILLARY MSL OA |
| ICD 10 | 02CD3ZZ | EXTIR MATR PAPILLARY MSL PA |
| ICD 10 | 02CD4ZZ | EXTIR MATR PAPILLARY MSL PE |
| ICD 10 | 02CF0ZZ | EXTIR MATR AORT VLV OA |
| ICD 10 | 02CF3ZZ | EXTIR MATR AORT VLV PA |
| ICD 10 | 02CF4ZZ | EXTIR MATR AORT VLV PE |
| ICD 10 | 02CG0ZZ | EXTIR MATR MITRAL VLV OA |
| ICD 10 | 02CG3ZZ | EXTIR MATR MITRAL VLV PA |
| ICD 10 | 02CG4ZZ | EXTIR MATR MITRAL VLV PE |
| ICD 10 | 02CH0ZZ | EXTIR MATR PULM VLV OA |
| ICD 10 | 02CH3ZZ | EXTIR MATR PULM VLV PA |
| ICD 10 | 02CH4ZZ | EXTIR MATR PULM VLV PE |
| ICD 10 | 02CJ0ZZ | EXTIR MATR TRICUS VLV OA |
| ICD 10 | 02CJ3ZZ | EXTIR MATR TRICUS VLV PA |
| ICD 10 | 02CJ4ZZ | EXTIR MATR TRICUS VLV PE |
| ICD 10 | 02CM0ZZ | EXTIR MATR VENTRICULAR SEPT OA |
| ICD 10 | 02CM3ZZ | EXTIR MATR VENTRICULAR SEPT PA |
| ICD 10 | 02CM4ZZ | EXTIR MATR VENTRICULAR SEPT PE |
| ICD 10 | 02LH0CZ | OCCLS PULM VLV W EXTRLUM OA |
| ICD 10 | 02LH0DZ | OCCLS PULM VLV W INTRLUM OA |
| ICD 10 | 02LH0ZZ | OCCLS PULM VLV OA |
| ICD 10 | 02LH3CZ | OCCLS PULM VLV W EXTRLUM PA |
| ICD 10 | 02LH3DZ | OCCLS PULM VLV W INTRLUM PA |
| ICD 10 | 02LH3ZZ | OCCLS PULM VLV PA |
| ICD 10 | 02LH4CZ | OCCLS PULM VLV W EXTRLUM PE |
| ICD 10 | 02LH4DZ | OCCLS PULM VLV W INTRLUM PE |
| ICD 10 | 02LH4ZZ | OCCLS PULM VLV PE |
| ICD 10 | 02LR0ZT | OCCLS DUCTUS ARTERIO OA |
| ICD 10 | 02LS0ZZ | OCCLS R PULM VN OA |
| ICD 10 | 02LT0ZZ | OCCLS L PULM VN OA |
| ICD 10 | 02N50ZZ | RELEASE ATRIAL SEPT OA |
| ICD 10 | 02N53ZZ | RELEASE ATRIAL SEPT PA |
| ICD 10 | 02N54ZZ | RELEASE ATRIAL SEPT PE |
| ICD 10 | 02N94ZZ | RELEASE CHOR TENDO PE |
| ICD 10 | 02ND0ZZ | RELEASE PAPILLARY MSL OA |
| ICD 10 | 02ND3ZZ | RELEASE PAPILLARY MSL PA |
| ICD 10 | 02ND4ZZ | RELEASE PAPILLARY MSL PE |
| ICD 10 | 02NF0ZZ | RELEASE AORT VLV OA |
| ICD 10 | 02NF3ZZ | RELEASE AORT VLV PA |
| ICD 10 | 02NF4ZZ | RELEASE AORT VLV PE |
| ICD 10 | 02NG0ZZ | RELEASE MITRAL VLV OA |
| ICD 10 | 02NG3ZZ | RELEASE MITRAL VLV PA |
| ICD 10 | 02NG4ZZ | RELEASE MITRAL VLV PE |
| ICD 10 | 02NH0ZZ | RELEASE PULM VLV OA |
| ICD 10 | 02NH3ZZ | RELEASE PULM VLV PA |
| ICD 10 | 02NH4ZZ | RELEASE PULM VLV PE |
| ICD 10 | 02NJ0ZZ | RELEASE TRICUS VLV OA |
| ICD 10 | 02NJ3ZZ | RELEASE TRICUS VLV PA |
| ICD 10 | 02NJ4ZZ | RELEASE TRICUS VLV PE |
| ICD 10 | 02NK0ZZ | RELEASE R VENTRICLE OA |
| ICD 10 | 02NK3ZZ | RELEASE R VENTRICLE PA |
| ICD 10 | 02NK4ZZ | RELEASE R VENTRICLE PE |
| ICD 10 | 02NL0ZZ | RELEASE L VENTRICLE OA |
| ICD 10 | 02NL3ZZ | RELEASE L VENTRICLE PA |
| ICD 10 | 02NL4ZZ | RELEASE L VENTRICLE PE |
| ICD 10 | 02NM0ZZ | RELEASE VENTRICULAR SEPTUM OA |
| ICD 10 | 02NM3ZZ | RELEASE VENTRICULAR SEPTUM PA |
| ICD 10 | 02NM4ZZ | RELEASE VENTRICULAR SEPTUM PE |
| ICD 10 | 02Q50ZZ | REPR ATRIAL SEPTUM OA |
| ICD 10 | 02Q53ZZ | REPR ATRIAL SEPTUM PA |
| ICD 10 | 02Q54ZZ | REPR ATRIAL SEPTUM PE |
| ICD 10 | 02Q90ZZ | REPR CHOR TEND OA |
| ICD 10 | 02Q94ZZ | REPR CHOR TEND PE |
| ICD 10 | 02QA0ZZ | REPAIR HEART OA |
| ICD 10 | 02QA3ZZ | REPAIR HEART PA |
| ICD 10 | 02QA4ZZ | REPAIR HEART PE |
| ICD 10 | 02QB0ZZ | REPAIR RIGHT HEART OA |
| ICD 10 | 02QB3ZZ | REPAIR RIGHT HEART PA |
| ICD 10 | 02QB4ZZ | REPAIR RIGHT HEART PE |
| ICD 10 | 02QC0ZZ | REPAIR LEFT HEART OA |
| ICD 10 | 02QC3ZZ | REPAIR LEFT HEART PA |
| ICD 10 | 02QC4ZZ | REPAIR LEFT HEART PE |
| ICD 10 | 02QD0ZZ | REPR PAPILLARY MUSCLE OA |
| ICD 10 | 02QD3ZZ | REPR PAPILLARY MUSCLE PA |
| ICD 10 | 02QD4ZZ | REPR PAPILLARY MUSCLE PE |
| ICD 10 | 02QF0ZJ | REPR AORT VLV CREATED FR TRNK VLV OA |
| ICD 10 | 02QF0ZZ | REPR AORT VLV OA |
| ICD 10 | 02QF3ZJ | REPR AORT VLV CREATED FR TRNK VLV PA |
| ICD 10 | 02QF3ZZ | REPR AORT VLV PA |
| ICD 10 | 02QF4ZJ | REPR AORT VLV CREAT FR TRNK VLV PE |
| ICD 10 | 02QF4ZZ | REPR AORT VLV PE |
| ICD 10 | 02QG0ZE | REPR MITRAL VLV CREAT FR L ATRIV VLV OA |
| ICD 10 | 02QG0ZZ | REPR MITRAL VLV OA |
| ICD 10 | 02QG3ZE | REPR MITRL VLV CREAT FR L ATRIV VLV PA |
| ICD 10 | 02QG3ZZ | REPR MITRAL VLV PA |
| ICD 10 | 02QG4ZE | REPR MITRL CREAT FR L ATRIV VLV PE |
| ICD 10 | 02QG4ZZ | REPR MITRAL VLV PE |
| ICD 10 | 02QH0ZZ | REPR PULM VLV OA |
| ICD 10 | 02QH3ZZ | REPR PULM VLV PA |
| ICD 10 | 02QH4ZZ | REPR PULM VLV PE |
| ICD 10 | 02QJ0ZG | REPR TRICUS VLV CREAT FR R ATRIV VLV OA |
| ICD 10 | 02QJ0ZZ | REPR TRICUS VLV OA |
| ICD 10 | 02QJ3ZG | REPR TRICUS VLV CREAT FR R ATRIV VL PA |
| ICD 10 | 02QJ3ZZ | REPR TRICUS VLV PA |
| ICD 10 | 02QJ4ZG | REPR TRICUS VLV CREAT R ATRIV VLV PA E |
| ICD 10 | 02QJ4ZZ | REPR TRICUS VLV PE |
| ICD 10 | 02QM0ZZ | REPR VENTRICULAR SEPT OA |
| ICD 10 | 02QM3ZZ | REPR VENTRICULAR SEPT PA |
| ICD 10 | 02QM4ZZ | REPR VENTRICULAR SEPT PE |
| ICD 10 | 02R50JZ | REPL ATRIAL SEPT SYN OA |
| ICD 10 | 02R907Z | REPL CHOR TEND W AUTOL TISS SUB OA |
| ICD 10 | 02R908Z | REPL CHOR TEND W ZOOPLS TISS OA |
| ICD 10 | 02R947Z | REPL CHOR TENDOOW AUTOL SUB PE |
| ICD 10 | 02R948Z | REPL CHOR TENDOOW ZOOPLS TISS PE |
| ICD 10 | 02R94JZ | REPL CHOR TENDOOSYNTH PE |
| ICD 10 | 02R94KZ | REPL CHOR TENDOOW NONAUT SUB PE |
| ICD 10 | 02RD07Z | REPL PAPILLARY MSL W AUTOL TISS SUB OA |
| ICD 10 | 02RD08Z | REPL PAPILLARY MSL W ZOOPLS TISS OA |
| ICD 10 | 02RD0JZ | REPL PAPILLARY MSL SYN OA |
| ICD 10 | 02RD0KZ | REPL PAPILLARY MSL NONAUT OA |
| ICD 10 | 02RD47Z | REPL PAPIL MSL AUTOL TISS SUB PE |
| ICD 10 | 02RD48Z | REPL PAPIL MSL W ZOOPLS TISS PE |
| ICD 10 | 02RD4JZ | REPL PAPIL MSL SYN PE |
| ICD 10 | 02RD4KZ | REPL PAPIL MSL NONAUT TISS SUB PE |
| ICD 10 | 02RF07Z | REPL AORT VLV W AUTOL TISS SUB OA |
| ICD 10 | 02RF08Z | REPL AORT VLV W ZOOPLS TISS OA |
| ICD 10 | 02RF0JZ | REPL AORT VLV SYN OA |
| ICD 10 | 02RF0KZ | REPL AORT VLV NONAUT OA |
| ICD 10 | 02RF37H | REPL AORT VLV W AUTOL SUB TRNSAP PA |
| ICD 10 | 02RF37Z | REPL AORT VLV W AUTOL TISS SUB PA |
| ICD 10 | 02RF38H | REPL AORT VLV W ZOOPLS TISS TRNSAP PA |
| ICD 10 | 02RF38Z | REPL AORT VLV W ZOOPLS TISS PA |
| ICD 10 | 02RF3JH | REPL AORT VLV SYN TRNSAP PA |
| ICD 10 | 02RF3JZ | REPL AORT VLV SYN PA |
| ICD 10 | 02RF3KH | REPL AORT VLV W NONAUT SUB TRNSAP PA |
| ICD 10 | 02RF3KZ | REPL AORT VLV NONAUT PA |
| ICD 10 | 02RF47Z | REPL AORT VLV W AUTOL TISS SUB PE |
| ICD 10 | 02RF48Z | REPL AORT VLV W ZOOPLS TISS PE |
| ICD 10 | 02RF4JZ | REPL AORT VLV SYN PE |
| ICD 10 | 02RF4KZ | REPL AORT VLV NONAUT TISS SUB PE |
| ICD 10 | 02RG07Z | REPL MITRAL VLV W AUTOL TISS SUB OA |
| ICD 10 | 02RG08Z | REPL MITRAL VLV W ZOOPLS TISS OA |
| ICD 10 | 02RG0JZ | REPL MITRAL VLV SYN OA |
| ICD 10 | 02RG0KZ | REPL MITRAL VLV NONAUT OA |
| ICD 10 | 02RG37H | REPL MITRAL VLV W AUTOL SUB TRNSAP PA |
| ICD 10 | 02RG37Z | REPL MITRAL VLV W AUTOL TISS SUB PA |
| ICD 10 | 02RG38H | REPL MITRAL VLV ZOOPLS TISS TRNSAP PA |
| ICD 10 | 02RG38Z | REPL MITRAL VLV W ZOOPLS TISS PA |
| ICD 10 | 02RG3JH | REPL MITRAL VLV SYN TRNSAP PA |
| ICD 10 | 02RG3JZ | REPL MITRAL VLV SYN PA |
| ICD 10 | 02RG3KH | REPL MITRAL VLV W NONAUT SUB TRNSAP PA |
| ICD 10 | 02RG3KZ | REPL MITRAL VLV NONAUT PA |
| ICD 10 | 02RG47Z | REPL MITRAL VLV AUTOL TISS SUB PE |
| ICD 10 | 02RG48Z | REPL MITRAL VLV W ZOOPLS TISS PE |
| ICD 10 | 02RG4JZ | REPL MITRAL VLV SYN PE |
| ICD 10 | 02RG4KZ | REPL MITRAL VLV W NONAUT SUB PE |
| ICD 10 | 02RH07Z | REPL PULM VLV W AUTOL TISS SUB OA |
| ICD 10 | 02RH08Z | REPL PULM VLV W ZOOPLS TISS OA |
| ICD 10 | 02RH0JZ | REPL PULM VLV SYN OA |
| ICD 10 | 02RH0KZ | REPL PULM VLV NONAUT OA |
| ICD 10 | 02RH37H | REPL PULM VLV AUTOL TISS SUB TRNSAP PA |
| ICD 10 | 02RH37Z | REPL PULM VLV W AUTOL TISS SUB PA |
| ICD 10 | 02RH38H | REPL PULM VLV W ZOOPLS TISS TRNSAP PA |
| ICD 10 | 02RH38Z | REPL PULM VLV W ZOOPLS TISS PA |
| ICD 10 | 02RH3JH | REPL PULM VLV SYN TRNSAP PA |
| ICD 10 | 02RH3JZ | REPL PULM VLV SYN PA |
| ICD 10 | 02RH3KH | REPL PULM VLV W NONAUT SUB TRNSAP PA |
| ICD 10 | 02RH3KZ | REPL PULM VLV NONAUT PA |
| ICD 10 | 02RH47Z | REPL PULM VLV W AUTOL TISS SUB PE |
| ICD 10 | 02RH48Z | REPL PULM VLV W ZOOPLS TISS PE |
| ICD 10 | 02RH4JZ | REPL PULM VLV SYN PE |
| ICD 10 | 02RH4KZ | REPL PULM VLV NONAUT TISS SUB PE |
| ICD 10 | 02RJ07Z | REPL TRICUS VLV W AUTOL TISS SUB OA |
| ICD 10 | 02RJ08Z | REPL TRICUS VLV W ZOOPLS TISS OA |
| ICD 10 | 02RJ0JZ | REPL TRICUS VLV SYN OA |
| ICD 10 | 02RJ0KZ | REPL TRICUS VLV NONAUT OA |
| ICD 10 | 02RJ37H | REPL TRICUS VLV W AUTOL SUB TRNSAP PA |
| ICD 10 | 02RJ37Z | REPL TRICUS VLV W AUTOL TISS SUB PA |
| ICD 10 | 02RJ38H | REPL TRICUS VLV ZOOPLS TISS TRNSAP PA |
| ICD 10 | 02RJ38Z | REPL TRICUS VLV W ZOOPLS TISS PA |
| ICD 10 | 02RJ3JH | REPL TRICUS VLV SYN TRNSAP PA |
| ICD 10 | 02RJ3JZ | REPL TRICUS VLV SYN PA |
| ICD 10 | 02RJ3KH | REPL TRICUS VLV W NONAUT SUB TRNSAP PA |
| ICD 10 | 02RJ3KZ | REPL TRICUS VLV NONAUT PA |
| ICD 10 | 02RJ47Z | REPL TRICUS VLV AUTOL TISS SUB PE |
| ICD 10 | 02RJ48Z | REPL TRICUS VLV W ZOOPLS TISS PE |
| ICD 10 | 02RJ4JZ | REPL TRICUS VLV SYN PE |
| ICD 10 | 02RJ4KZ | REPL TRICUS VLV W NONAUT SUB PE |
| ICD 10 | 02RK07Z | REPL R VENT W AUTOL TISS SUB OA |
| ICD 10 | 02RK0KZ | REPL R VENT NONAUT OA |
| ICD 10 | 02RK47Z | REPL R VENT W AUTOL TISS SUB PE |
| ICD 10 | 02RK4KZ | REPL R VENT NONAUT PE |
| ICD 10 | 02RL07Z | REPL L VENT W AUTOL TISS SUB OA |
| ICD 10 | 02RL0KZ | REPL L VENT NONAUT OA |
| ICD 10 | 02RL47Z | REPL L VENT W AUTOL TISS SUB PE |
| ICD 10 | 02RL4KZ | REPL L VENT NONAUT PE |
| ICD 10 | 02RM07Z | REPL VENTRICULAR SEPT AUTOL TISS SUB OA |
| ICD 10 | 02RM0JZ | REPL VENTRICULAR SEPT SYN OA |
| ICD 10 | 02RM0KZ | REPL VENTRICULAR SEPT NONAUT TISS SUB OA |
| ICD 10 | 02RM47Z | REPL VENT SEPT AUTOL TISS SUB PE |
| ICD 10 | 02RM4JZ | REPL VENT SEPT SYN PE |
| ICD 10 | 02RM4KZ | REPL VENT SEPT NONAUT TISS SUB PE |
| ICD 10 | 02RP0JZ | REPL PULM TRNK SYN OA |
| ICD 10 | 02RQ07Z | REPL R PULM ART W AUTOL TISS SUB OA |
| ICD 10 | 02RQ0JZ | REPL R PULM ART SYN OA |
| ICD 10 | 02RR07Z | REPL L PULM ART W AUTOL TISS SUB OA |
| ICD 10 | 02RR0JZ | REPL L PULM ART SYN OA |
| ICD 10 | 02S00ZZ | REPOS COR ART 1 ART OA |
| ICD 10 | 02S10ZZ | REPOS COR ART 2 ART OA |
| ICD 10 | 02SP0ZZ | REPOS PULM TRNK OA |
| ICD 10 | 02SW0ZZ | REPOS THORACIC AORT DESC OA |
| ICD 10 | 02SX0ZZ | REPOS THORACIC AORT ASC/ARCH OA |
| ICD 10 | 02T50ZZ | RECT ATRIAL SEPT OA |
| ICD 10 | 02T53ZZ | RECT ATRIAL SEPT PA |
| ICD 10 | 02T54ZZ | RECT ATRIAL SEPT PE |
| ICD 10 | 02T90ZZ | RECT CHOR TENDOOA |
| ICD 10 | 02T93ZZ | RECT CHOR TENDOPERC |
| ICD 10 | 02T94ZZ | RECT CHOR TENDOOPERC ENDO |
| ICD 10 | 02TD0ZZ | RECT PAPILLARY MSL OA |
| ICD 10 | 02TD3ZZ | RECT PAPILLARY MSL PA |
| ICD 10 | 02TD4ZZ | RECT PAPILLARY MSL PE |
| ICD 10 | 02TH0ZZ | RECT PULM VLV OA |
| ICD 10 | 02TH3ZZ | RECT PULM VLV PA |
| ICD 10 | 02TH4ZZ | RECT PULM VLV PE |
| ICD 10 | 02TM0ZZ | RECT VENTRICULAR SEPT OA |
| ICD 10 | 02TM3ZZ | RECT VENTRICULAR SEPT PA |
| ICD 10 | 02TM4ZZ | RECT VENTRICULAR SEPT PE |
| ICD 10 | 02U507Z | SUPMT ATRIAL SEPT W AUTOL TISS SUB OA |
| ICD 10 | 02U508Z | SUPMT ATRIAL SEPT W ZOOPLS TISS OA |
| ICD 10 | 02U50JZ | SUPMT ATRIAL SEPT SYN OA |
| ICD 10 | 02U50KZ | SUPMT ATRIAL SEPT NONAUT OA |
| ICD 10 | 02U537Z | SUPMT ATRIAL SEPT W AUTOL TISS SUB PA |
| ICD 10 | 02U538Z | SUPMT ATRIAL SEPT W ZOOPLS TISS PA |
| ICD 10 | 02U53JZ | SUPMT ATRIAL SEPT SYN PA |
| ICD 10 | 02U53KZ | SUPMT ATRIAL SEPT NONAUT PA |
| ICD 10 | 02U547Z | SUPMT ATRIAL SEPT W AUTOL SUB PE |
| ICD 10 | 02U548Z | SUPMT ATRIAL SEPT ZOOPLS TISS PE |
| ICD 10 | 02U54JZ | SUPMT ATRIAL SEPT SYN PE |
| ICD 10 | 02U54KZ | SUPMT ATRIAL SEPT W NONAUT SUB PE |
| ICD 10 | 02U607Z | SUPMT R ATRM W AUTOL TISS SUB OA |
| ICD 10 | 02U608Z | SUPMT R ATRM W ZOOPLS TISS OA |
| ICD 10 | 02U60KZ | SUPMT R ATRM NONAUT OA |
| ICD 10 | 02U707Z | SUPMT L ATRM W AUTOL TISS SUB OA |
| ICD 10 | 02U708Z | SUPMT L ATRM W ZOOPLS TISS OA |
| ICD 10 | 02U70JZ | SUPMT L ATRM SYN OA |
| ICD 10 | 02U70KZ | SUPMT L ATRM NONAUT OA |
| ICD 10 | 02U737Z | SUPMT L ATRM W AUTOL TISS SUB PA |
| ICD 10 | 02U738Z | SUPMT L ATRM W ZOOPLS TISS PA |
| ICD 10 | 02U73KZ | SUPMT L ATRM NONAUT PA |
| ICD 10 | 02U747Z | SUPMT L ATRM W AUTOL TISS SUB PE |
| ICD 10 | 02U748Z | SUPMT L ATRM W ZOOPLS TISS PE |
| ICD 10 | 02U74KZ | SUPMT L ATRM NONAUT PE |
| ICD 10 | 02U907Z | SUPMT CHOR TEND W AUTOL TISS SUB OA |
| ICD 10 | 02U908Z | SUPMT CHOR TEND W ZOOPLS TISS OA |
| ICD 10 | 02U90JZ | SUPMT CHOR TEND SYN OA |
| ICD 10 | 02U90KZ | SUPMT CHOR TEND NONAUT OA |
| ICD 10 | 02U937Z | SUPMT CHOR TEND W AUTOL TISS SUB PA |
| ICD 10 | 02U938Z | SUPMT CHOR TEND W ZOOPLS TISS PA |
| ICD 10 | 02U93JZ | SUPMT CHOR TEND SYN PA |
| ICD 10 | 02U93KZ | SUPMT CHOR TEND NONAUT PA |
| ICD 10 | 02U947Z | SUPMT CHOR TEND W AUTOL SUB PE |
| ICD 10 | 02U948Z | SUPMT CHOR TEND W ZOOPLS TISS PE |
| ICD 10 | 02U94JZ | SUPMT CHOR TEND SYN PE |
| ICD 10 | 02U94KZ | SUPMT CHOR TEND NONAUT PE |
| ICD 10 | 02UD07Z | SUPMT PAPILLARY MSL W AUTOL TISS SUB OA |
| ICD 10 | 02UD08Z | SUPMT PAPILLARY MSL W ZOOPLS TISS OA |
| ICD 10 | 02UD0JZ | SUPMT PAPILLARY MSL SYN OA |
| ICD 10 | 02UD0KZ | SUPMT PAPILLARY MSL NONAUT OA |
| ICD 10 | 02UD37Z | SUPMT PAPILLARY MSL AUTOL TISS SUB PA |
| ICD 10 | 02UD38Z | SUPMT PAPILLARY MSL W ZOOPLS TISS PA |
| ICD 10 | 02UD3JZ | SUPMT PAPILLARY MSL SYN PA |
| ICD 10 | 02UD3KZ | SUPMT PAPILLARY MSL NONAUT TISS SUB PA |
| ICD 10 | 02UD47Z | SUPMT PAPILLARY MSL AUTOL SUB PE |
| ICD 10 | 02UD48Z | SUPMT PAPILLARY MSL W ZOOPLS PE |
| ICD 10 | 02UD4JZ | SUPMT PAPILLARY MSL SYN SUB PE |
| ICD 10 | 02UD4KZ | SUPMT PAPILLARY MSL NONAUT SUB PE |
| ICD 10 | 02UF07J | SUPMT AORT VLV CREAT TRNK VLV AUTOL OA |
| ICD 10 | 02UF07Z | SUPMT AORT VLV W AUTOL TISS SUB OA |
| ICD 10 | 02UF08J | SUPMT AORT VLV CREAT TRNK VLV ZOOPLS OA |
| ICD 10 | 02UF08Z | SUPMT AORT VLV W ZOOPLS TISS OA |
| ICD 10 | 02UF0JJ | SUPMT AORT VLV CREAT FR TRNK VLV SYN OA |
| ICD 10 | 02UF0JZ | SUPMT AORT VLV SYN OA |
| ICD 10 | 02UF0KJ | SUPMT AORT VLV CREAT TRNK VLV NONAUT OA |
| ICD 10 | 02UF0KZ | SUPMT AORT VLV NONAUT OA |
| ICD 10 | 02UF37J | SUPMT AORT VLV CREAT TRNK VLV AUTOL PA |
| ICD 10 | 02UF37Z | SUPMT AORT VLV W AUTOL TISS SUB PA |
| ICD 10 | 02UF38J | SUPMT AORT VLV CREAT TRNK VLV ZOOPLS PA |
| ICD 10 | 02UF38Z | SUPMT AORT VLV W ZOOPLS TISS PA |
| ICD 10 | 02UF3JJ | SUPMT AORT VLV FROM TRNK VLV SYN PA |
| ICD 10 | 02UF3JZ | SUPMT AORT VLV SYN PA |
| ICD 10 | 02UF3KJ | SUPMT AORT VLV FROM TRNK VLV NONAUT PA |
| ICD 10 | 02UF3KZ | SUPMT AORT VLV NONAUT PA |
| ICD 10 | 02UF47J | SUPMT AORT VLV FR TRNK VLV AUTOL PE |
| ICD 10 | 02UF47Z | SUPMT AORT VLV W AUTOL TISS SUB PE |
| ICD 10 | 02UF48J | SUPMT AORT VLV FR TRNK VLV ZOOPLS PE |
| ICD 10 | 02UF48Z | SUPMT AORT VLV W ZOOPLS TISS PE |
| ICD 10 | 02UF4JJ | SUPMT AORT VLV FR TRNK VLV SYN PE |
| ICD 10 | 02UF4JZ | SUPMT AORT VLV SYN PE |
| ICD 10 | 02UF4KJ | SUPMT AORT VLV TRNK VLV NONAUT PE |
| ICD 10 | 02UF4KZ | SUPMT AORT VLV W NONAUT SUB PE |
| ICD 10 | 02UG07E | SUPMT MITRAL VLV FR L ATRIV VLV AUTOL OA |
| ICD 10 | 02UG07Z | SUPMT MITRAL VLV W AUTOL TISS SUB OA |
| ICD 10 | 02UG08E | SUPMT MITRAL VLV L ATRIV VLV ZOOPLS OA |
| ICD 10 | 02UG08Z | SUPMT MITRAL VLV W ZOOPLS TISS OA |
| ICD 10 | 02UG0JE | SUPMT MITRAL VLV FR L ATRIV VLV SYN OA |
| ICD 10 | 02UG0JZ | SUPMT MITRAL VLV SYN OA |
| ICD 10 | 02UG0KE | SUPMT MITRAL VLV L ATRIV VLV NONAUT OA |
| ICD 10 | 02UG0KZ | SUPMT MITRAL VLV NONAUT OA |
| ICD 10 | 02UG37E | SUPMT MITRAL VLV L ATRIV VLV AUTOL PA |
| ICD 10 | 02UG37Z | SUPMT MITRAL VLV W AUTOL TISS SUB PA |
| ICD 10 | 02UG38E | SUPMT MITRAL VLV L ATRIV VLV ZOOPLS PA |
| ICD 10 | 02UG38Z | SUPMT MITRAL VLV W ZOOPLS TISS PA |
| ICD 10 | 02UG3JE | SUPMT MITRAL VLV L ATRIV VLV SYN PA |
| ICD 10 | 02UG3JZ | SUPMT MITRAL VLV SYN PA |
| ICD 10 | 02UG3KE | SUPMT MITRAL VLV L ATRIV VLV NONAUT PA |
| ICD 10 | 02UG3KZ | SUPMT MITRAL VLV NONAUT PA |
| ICD 10 | 02UG47E | SUPMT MITRL VLV L ATRIV VLV AUTOL PE |
| ICD 10 | 02UG47Z | SUPMT MITRAL VLV W AUTOL SUB PE |
| ICD 10 | 02UG48E | SUPMT MITRL VLV L ATRIV VLV ZOOPLS PE |
| ICD 10 | 02UG48Z | SUPMT MITRAL VLV W ZOOPLS TISS PE |
| ICD 10 | 02UG4JE | SUPMT MITRL L ATRIV VLV SYN PE |
| ICD 10 | 02UG4JZ | SUPMT MITRAL VLV SYN PE |
| ICD 10 | 02UG4KE | SUPMT MITRAL L ATRIV VLV NONAUT PE |
| ICD 10 | 02UG4KZ | SUPMT MITRAL VLV W NONAUT SUB PE |
| ICD 10 | 02UH07Z | SUPMT PULM VLV W AUTOL TISS SUB OA |
| ICD 10 | 02UH08Z | SUPMT PULM VLV W ZOOPLS TISS OA |
| ICD 10 | 02UH0JZ | SUPMT PULM VLV SYN OA |
| ICD 10 | 02UH0KZ | SUPMT PULM VLV NONAUT OA |
| ICD 10 | 02UH37Z | SUPMT PULM VLV W AUTOL TISS SUB PA |
| ICD 10 | 02UH38Z | SUPMT PULM VLV W ZOOPLS TISS PA |
| ICD 10 | 02UH3JZ | SUPMT PULM VLV SYN PA |
| ICD 10 | 02UH3KZ | SUPMT PULM VLV NONAUT PA |
| ICD 10 | 02UH47Z | SUPMT PULM VLV W AUTOL TISS SUB PE |
| ICD 10 | 02UH48Z | SUPMT PULM VLV W ZOOPLS TISS PE |
| ICD 10 | 02UH4JZ | SUPMT PULM VLV SYN PE |
| ICD 10 | 02UH4KZ | SUPMT PULM VLV W NONAUT SUB PE |
| ICD 10 | 02UJ07G | SUPMT TRICUS VLV R ATRIV VLV AUTOL OA |
| ICD 10 | 02UJ07Z | SUPMT TRICUS VLV W AUTOL TISS SUB OA |
| ICD 10 | 02UJ08G | SUPMT TRICUS VLV R ATRIV VLV ZOOPLS OA |
| ICD 10 | 02UJ08Z | SUPMT TRICUS VLV W ZOOPLS TISS OA |
| ICD 10 | 02UJ0JG | SUPMT TRICUS VLV FR R ATRIV VLV SYN OA |
| ICD 10 | 02UJ0JZ | SUPMT TRICUS VLV SYN OA |
| ICD 10 | 02UJ0KG | SUPMT TRICUS FR R ATRIV VLV NONAUT OA |
| ICD 10 | 02UJ0KZ | SUPMT TRICUS VLV NONAUT OA |
| ICD 10 | 02UJ37G | SUPMT TRICUS FR R ATRIV VLV AUTOL PA |
| ICD 10 | 02UJ37Z | SUPMT TRICUS VLV W AUTOL TISS SUB PA |
| ICD 10 | 02UJ38G | SUPMT TRICUS VLV R ATRIV VLV ZOOPLS PA |
| ICD 10 | 02UJ38Z | SUPMT TRICUS VLV W ZOOPLS TISS PA |
| ICD 10 | 02UJ3JG | SUPMT TRICUS FR R ATRIV VLV SYN PA |
| ICD 10 | 02UJ3JZ | SUPMT TRICUS VLV SYN PA |
| ICD 10 | 02UJ3KG | SUPMT TRICUS FR R ATRIV VLV NONAUT PA |
| ICD 10 | 02UJ3KZ | SUPMT TRICUS VLV NONAUT PA |
| ICD 10 | 02UJ47G | SUPMT TRICUS R ATRIV VLV AUTOL PE |
| ICD 10 | 02UJ47Z | SUPMT TRICUS VLV AUTOL SUB PE |
| ICD 10 | 02UJ48G | SUPMT TRICUS FR R ATRIV VLV ZOOPLS PE |
| ICD 10 | 02UJ48Z | SUPMT TRICUS VLV W ZOOPLS TISS PE |
| ICD 10 | 02UJ4JG | SUPMT TRICUS R ATRIV VLV SYN PE |
| ICD 10 | 02UJ4JZ | SUPMT TRICUS VLV SYN PE |
| ICD 10 | 02UJ4KG | SUPMT TRICUS R ATRIV VLV NONAUT PE |
| ICD 10 | 02UJ4KZ | SUPMT TRICUS VLV NONAUT SUB PE |
| ICD 10 | 02UK0KZ | SUPMT R VENT NONAUT OA |
| ICD 10 | 02UK3KZ | SUPMT R VENT NONAUT PA |
| ICD 10 | 02UK4KZ | SUPMT R VENT NONAUT PE |
| ICD 10 | 02UL0KZ | SUPMT L VENT NONAUT OA |
| ICD 10 | 02UL3KZ | SUPMT L VENT NONAUT PA |
| ICD 10 | 02UL4KZ | SUPMT L VENT NONAUT PE |
| ICD 10 | 02UM07Z | SUPMT VENTRICULAR SEPT AUTOL TISS SUB OA |
| ICD 10 | 02UM0JZ | SUPMT VENTRICULAR SEPT SYN OA |
| ICD 10 | 02UM0KZ | SUPMT VENTRICULAR SEPT W NONAUT SUB OA |
| ICD 10 | 02UM37Z | SUPMT VENTRICULAR SEPT W AUTOL SUB PA |
| ICD 10 | 02UM38Z | SUPMT VENTRICULAR SEPT W ZOOPLS PA |
| ICD 10 | 02UM3JZ | SUPMT VENTRICULAR SEPT SYN PA |
| ICD 10 | 02UM3KZ | SUPMT VENTRICULAR SEPT W NONAUT SUB PA |
| ICD 10 | 02UM47Z | SUPMT VENTRICULAR SEPT AUTOL PE |
| ICD 10 | 02UM48Z | SUPMT VENTRICULAR SEPT ZOOPLS PE |
| ICD 10 | 02UM4JZ | SUPMT VENTRICULAR SEPT SYN PE |
| ICD 10 | 02UM4KZ | SUPMT VENT SEPT W NONAUT SUB PE |
| ICD 10 | 02UP07Z | SUPMT PULM TRNK W AUTOL TISS SUB OA |
| ICD 10 | 02UP0JZ | SUPMT PULM TRNK SYN OA |
| ICD 10 | 02UP0KZ | SUPMT PULM TRNK NONAUT OA |
| ICD 10 | 02UP37Z | SUPMT PULM TRNK W AUTOL TISS SUB PA |
| ICD 10 | 02UP3JZ | SUPMT PULM TRNK SYN PA |
| ICD 10 | 02UP3KZ | SUPMT PULM TRNK NONAUT PA |
| ICD 10 | 02UP47Z | SUPMT PULM TRNK W AUTOL SUB PE |
| ICD 10 | 02UP4JZ | SUPMT PULM TRNK SYN PE |
| ICD 10 | 02UP4KZ | SUPMT PULM TRNK W NONAUT SUB PE |
| ICD 10 | 02UQ07Z | SUPMT R PULM ART W AUTOL TISS SUB OA |
| ICD 10 | 02UQ0JZ | SUPMT R PULM ART SYN OA |
| ICD 10 | 02UQ0KZ | SUPMT R PULM ART NONAUT OA |
| ICD 10 | 02UQ37Z | SUPMT R PULM ART W AUTOL TISS SUB PA |
| ICD 10 | 02UQ3JZ | SUPMT R PULM ART SYN PA |
| ICD 10 | 02UQ3KZ | SUPMT R PULM ART NONAUT PA |
| ICD 10 | 02UQ47Z | SUPMT R PULM ART W AUTOL SUB PE |
| ICD 10 | 02UQ4JZ | SUPMT R PULM ART SYN PE |
| ICD 10 | 02UQ4KZ | SUPMT R PULM ART W NONAUT SUB PE |
| ICD 10 | 02UW07Z | SUPMT THORACIC AORT DESC W AUTOL SUB OA |
| ICD 10 | 02VG0ZZ | RESTR MITRAL VLV OA |
| ICD 10 | 02VG3ZZ | RESTR MITRAL VLV PA |
| ICD 10 | 02VG4ZZ | RESTR MITRAL VLV PE |
| ICD 10 | 02VR0ZT | RESTR DUCTUS ARTERIO OA |
| ICD 10 | 02W50JZ | REVIS SYN SUB IN ATRIAL SEPT OA |
| ICD 10 | 02W54JZ | REVIS SYN SUB IN ATRIAL SEPT PE |
| ICD 10 | 02WF07Z | REVIS AUTOL TISS SUB IN AORT VLV OA |
| ICD 10 | 02WF08Z | REVIS ZOOPLS TISS IN AORT VLV OA |
| ICD 10 | 02WF0JZ | REVIS SYN SUB IN AORT VLV OA |
| ICD 10 | 02WF0KZ | REVIS NONAUT TISS SUB IN AORT VLV OA |
| ICD 10 | 02WF37Z | REVIS AUTOL TISS SUB IN AORT VLV PA |
| ICD 10 | 02WF38Z | REVIS ZOOPLS TISS IN AORT VLV PA |
| ICD 10 | 02WF3JZ | REVIS SYN SUB IN AORT VLV PA |
| ICD 10 | 02WF3KZ | REVIS NONAUT TISS SUB IN AORT VLV PA |
| ICD 10 | 02WF47Z | REVIS AUTOL TISS SUB AORT VLV PE |
| ICD 10 | 02WF48Z | REVIS ZOOPLS TISS IN AORT VLV PE |
| ICD 10 | 02WF4JZ | REVIS SYN SUB IN AORT VLV PE |
| ICD 10 | 02WF4KZ | REVIS NONAUT TISS SUB AORT VLV PE |
| ICD 10 | 02WG07Z | REVIS AUTOL TISS SUB IN MITRAL VLV OA |
| ICD 10 | 02WG08Z | REVIS ZOOPLS TISS IN MITRAL VLV OA |
| ICD 10 | 02WG0JZ | REVIS SYN SUB IN MITRAL VLV OA |
| ICD 10 | 02WG0KZ | REVIS NONAUT TISS SUB IN MITRAL VLV OA |
| ICD 10 | 02WG37Z | REVIS AUTOL TISS SUB IN MITRAL VLV PA |
| ICD 10 | 02WG38Z | REVIS ZOOPLS TISS IN MITRAL VLV PA |
| ICD 10 | 02WG3JZ | REVIS SYN SUB IN MITRAL VLV PA |
| ICD 10 | 02WG3KZ | REVIS NONAUT TISS SUB IN MITRAL VLV PA |
| ICD 10 | 02WG47Z | REVIS AUTOL TISS SUB MITRAL VLV PE |
| ICD 10 | 02WG48Z | REVIS ZOOPLS TISS MITRAL VLV PE |
| ICD 10 | 02WG4JZ | REVIS SYN SUB IN MITRAL VLV PE |
| ICD 10 | 02WG4KZ | REVIS NONAUT TISS MITRAL VLV PE |
| ICD 10 | 02WH07Z | REVIS AUTOL TISS SUB IN PULM VLV OA |
| ICD 10 | 02WH08Z | REVIS ZOOPLS TISS IN PULM VLV OA |
| ICD 10 | 02WH0JZ | REVIS SYN SUB IN PULM VLV OA |
| ICD 10 | 02WH0KZ | REVIS NONAUT TISS SUB IN PULM VLV OA |
| ICD 10 | 02WH37Z | REVIS AUTOL TISS SUB IN PULM VLV PA |
| ICD 10 | 02WH38Z | REVIS ZOOPLS TISS IN PULM VLV PA |
| ICD 10 | 02WH3JZ | REVIS SYN SUB IN PULM VLV PA |
| ICD 10 | 02WH3KZ | REVIS NONAUT TISS SUB IN PULM VLV PA |
| ICD 10 | 02WH47Z | REVIS AUTOL TISS SUB PULM VLV PE |
| ICD 10 | 02WH48Z | REVIS ZOOPLS TISS IN PULM VLV PE |
| ICD 10 | 02WH4JZ | REVIS SYN SUB IN PULM VLV PE |
| ICD 10 | 02WH4KZ | REVIS NONAUT TISS IN PULM VLV PE |
| ICD 10 | 02WJ07Z | REVIS AUTOL TISS SUB IN TRICUS VLV OA |
| ICD 10 | 02WJ08Z | REVIS ZOOPLS TISS IN TRICUS VLV OA |
| ICD 10 | 02WJ0JZ | REVIS SYN SUB IN TRICUS VLV OA |
| ICD 10 | 02WJ0KZ | REVIS NONAUT TISS SUB IN TRICUS VLV OA |
| ICD 10 | 02WJ37Z | REVIS AUTOL TISS SUB IN TRICUS VLV PA |
| ICD 10 | 02WJ38Z | REVIS ZOOPLS TISS IN TRICUS VLV PA |
| ICD 10 | 02WJ3JZ | REVIS SYN SUB IN TRICUS VLV PA |
| ICD 10 | 02WJ3KZ | REVIS NONAUT TISS SUB IN TRICUS VLV PA |
| ICD 10 | 02WJ47Z | REVIS AUTOL SUB TRICUS VLV PE |
| ICD 10 | 02WJ48Z | REVIS ZOOPLS TISS TRICUS VLV PE |
| ICD 10 | 02WJ4JZ | REVIS SYN SUB IN TRICUS VLV PE |
| ICD 10 | 02WJ4KZ | REVIS NONAUT SUB IN TRICUS VLV PE |
| ICD 10 | 02WM0JZ | REVIS SYN SUB IN VENTRICULAR SEPT OA |
| ICD 10 | 02WM4JZ | REVIS SYN SUB IN VENT SEPT PE |
| ICD 10 | X2RF032 | REPL AORT VLV ZOOPLS TISS RAPID DELOYTOA |
| ICD 10 | X2RF332 | REPL AORT VLV ZOOPLS TISS RAPID DELOYTPA |
| ICD 10 | X2RF432 | REPL AORT VLV ZOOPLS TISSRAPID DELOYTPEA |
| CPT | 33361 | REPLACE AORTIC VALVE PERQ |
| CPT | 33362 | REPLACE AORTIC VALVE OPEN |
| CPT | 33363 | REPLACE AORTIC VALVE OPEN |
| CPT | 33364 | REPLACE AORTIC VALVE OPEN |
| CPT | 33365 | REPLACE AORTIC VALVE OPEN |
| CPT | 33366 | TRCATH REPLACE AORTIC VALVE |
| CPT | 33367 | REPLACE AORTIC VALVE W/BYP |
| CPT | 33368 | REPLACE AORTIC VALVE W/BYP |
| CPT | 33369 | REPLACE AORTIC VALVE W/BYP |
| CPT | 33390 | VALVULOPLASTY AORTIC VALVE |
| CPT | 33391 | VALVULOPLASTY AORTIC VALVE |
| CPT | 33400 | VALVULPLSTY AORTIC; OPN W/CP BYPASS |
| CPT | 33401 | VALVULPLASTY AORTIC; OPEN W/OCCL |
| CPT | 33403 | VALVULPLSTY AORTIC; W/DILAT CP BYPS |
| CPT | 33405 | REPL AORTIC VALV W/BYPASS; W/PROSTH |
| CPT | 33406 | REPL AORTIC VALV CP BYPS; W/ALLOGFT |
| CPT | 33410 | REPL AORTIC VALVE; W/TISS VALVE |
| CPT | 33411 | REPL AORTIC VALV; W/AORTIC ANNULUS |
| CPT | 33412 | REPL AORTIC VALV; W/TRNSVENT AORTIC |
| CPT | 33413 | REPL AORTC VALV; AUTOL PULM VALVE |
| CPT | 33414 | REPR LT VENT OUTFLOW OBST PATCH |
| CPT | 33415 | RES/INCI SUBVALVULAR TISS-STENOSIS |
| CPT | 33416 | VENTRICULOMYOT IDIOPATHIC STENOSIS |
| CPT | 33417 | AORTOPLASTY SUPRAVALVULAR STENOSIS |
| CPT | 33418 | REPAIR TCAT MITRAL VALVE |
| CPT | 33419 | REPAIR TCAT MITRAL VALVE |
| CPT | 33420 | VALVOTOMY MITRAL VALVE; CLOS HEART |
| CPT | 33422 | VALVOT MITRAL; OPEN HEART W/CP BYPS |
| CPT | 33425 | VALVULPLSTY MITRAL VALVE W/CP BYPS; |
| CPT | 33426 | VALVULPLSTY MITRAL W/CP BYPS;W/RING |
| CPT | 33427 | VALVULPLST MITRAL W/BYPS;RADL RECON |
| CPT | 33430 | REPLACEMENT MITRAL VALVE W/CP BYPS |
| CPT | 33460 | VALVCTOMY TRICUSPID VALV W/CP BYPS |
| CPT | 33463 | VALVULPLSTY TRICUSPID;WO RING INSRT |
| CPT | 33464 | VALCULPLSTY TRICUSPID; W/RING INSRT |
| CPT | 33465 | REPLCMT TRICUSPID VALVE W/CP BYPS |
| CPT | 33468 | TRICUSPID VALV REPSTN EBSTEIN ANOML |
| CPT | 33470 | VALVOT PULM VALV CLO HRT; TRANSVENT |
| CPT | 33471 | VALVOT PULM CLOS HRT; VIA PULM ART |
| CPT | 33474 | VALVOT PULM VALV OPN HRT; W/CP BYPS |
| CPT | 33475 | REPLACEMENT PULMONARY VALVE |
| CPT | 33476 | RT VENT RESECTION INFUNDIB STENOSIS |
| CPT | 33477 | IMPLANT TCAT PULM VLV PERQ |
| CPT | 33478 | OUTFLOW TRACT AUG W/WO COMMISSUROT |
| CPT | 33496 | REPR PROSTH VALV W/CP BYPS SEP PROC |
| CPT | 33600 | CLOS ATRIOVENT VALV SUT/PATCH |
| CPT | 33602 | CLOS SEMILUNAR VALVE SUTURE/PATCH |
| CPT | 34501 | VALVULOPLASTY FEMORAL VEIN |

Left Atrial Appendage Occlusion

| **Code Type** | **Code** | **Description** |
| --- | --- | --- |
| ICD 10 | 02570ZK | DESTRUCTION L ATRIAL APPENDAGE OA |
| ICD 10 | 02573ZK | DESTRUCTION L ATRIAL APPENDAGE PA |
| ICD 10 | 02574ZK | DEST L ATRIAL APPENDAGE PE |
| ICD 10 | 02B70ZK | EXCISION L ATRIAL APPENDAGE OA |
| ICD 10 | 02B73ZK | EXCISION L ATRIAL APPENDAGE PA |
| ICD 10 | 02B74ZK | EXCISION L ATRIAL APPENDAGE PE |
| ICD 10 | 02H73DZ | INSERT INTRLUM INTO L ATRM PA |
| ICD 10 | 02H74DZ | INSERT INTRLUM INTO L ATRM PE |
| ICD 10 | 02L70CK | OCCLS L ATRIAL APPEDG W EXTRLUM OA |
| ICD 10 | 02L70DK | OCCLS L ATRIAL APPEDG W INTRLUM OA |
| ICD 10 | 02L70ZK | OCCLS L ATRIAL APPENDAGE OA |
| ICD 10 | 02L73CK | OCCLS L ATRIAL APPEDG W EXTRLUM PA |
| ICD 10 | 02L73DK | OCCLS L ATRIAL APPEDG W INTRLUM PA |
| ICD 10 | 02L73ZK | OCCLS L ATRIAL APPENDAGE PA |
| ICD 10 | 02L74CK | OCCLS L ATRL APPEDG EXTRLUM PE |
| ICD 10 | 02L74DK | OCCLS L ATRL APPEDG INTRLUM PE |
| ICD 10 | 02L74ZK | OCCLS L ATRIAL APPENDOAGE PE |

Cardiovascular disease

| **Code Type** | **Code** | **Description** |
| --- | --- | --- |
| ICD 10 | I00 | RHEUMATIC FEVER WO HRT INVL |
| ICD 10 | I01 | RHEUMATIC FEVER W HEART INVOLVEMNT |
| ICD 10 | I01.0 | AC RHEUMATIC PERICARDITIS |
| ICD 10 | I01.1 | AC RHEUMATIC ENDOCARDITIS |
| ICD 10 | I01.2 | AC RHEUMATIC MYOCARDITIS |
| ICD 10 | I01.8 | OTH AC RHEUMATIC HRT DZ |
| ICD 10 | I01.9 | AC RHEUMATIC HRT DZ UNSP |
| ICD 10 | I02 | RHEUMATIC CHOREA |
| ICD 10 | I02.0 | RHEUMATIC CHOREA W HRT INVL |
| ICD 10 | I02.9 | RHEUMATIC CHOREA WO HRT INVL |
| ICD 10 | I05 | RHEUMATIC MITRAL VALVE DISEASES |
| ICD 10 | I05.0 | RHEUMATIC MITRAL STEN |
| ICD 10 | I05.1 | RHEUMATIC MITRAL INSUFF |
| ICD 10 | I05.2 | RHEUMATIC MITRAL STEN W INSUFF |
| ICD 10 | I05.8 | OTH RHEUMATIC MITRAL VLV DZ |
| ICD 10 | I05.9 | RHEUMATIC MITRAL VLV DZ UNSP |
| ICD 10 | I06 | RHEUMATIC AORTIC VALVE DISEASES |
| ICD 10 | I06.0 | RHEUMATIC AORT STEN |
| ICD 10 | I06.1 | RHEUMATIC AORT INSUFF |
| ICD 10 | I06.2 | RHEUMATIC AORT STEN W INSUFF |
| ICD 10 | I06.8 | OTH RHEUMATIC AORT VLV DZ |
| ICD 10 | I06.9 | RHEUMATIC AORT VLV DZ UNSP |
| ICD 10 | I07 | RHEUMATIC TRICUSPID VALVE DISEASES |
| ICD 10 | I07.0 | RHEUMATIC TRICUS STEN |
| ICD 10 | I07.1 | RHEUMATIC TRICUS INSUFF |
| ICD 10 | I07.2 | RHEUMATIC TRICUS STEN&INSUFF |
| ICD 10 | I07.8 | OTH RHEUMATIC TRICUS VLV DZ |
| ICD 10 | I07.9 | RHEUMATIC TRICUS VLV DZ UNSP |
| ICD 10 | I08 | MULTIPLE VALVE DISEASES |
| ICD 10 | I08.0 | RHEUMATIC DISORD BOTH MITRAL&AORT VLV |
| ICD 10 | I08.1 | RHEUMTC DSRDR MITRL&TRICUSPD VALVES |
| ICD 10 | I08.2 | RHEUMATIC DISORD BOTH AORT&TRICUS VLV |
| ICD 10 | I08.3 | RHEUMTC DSRDR MITR,AORT&TRICSPD VLV |
| ICD 10 | I08.8 | OTH RHEUMATIC MULT VLV DZ |
| ICD 10 | I08.9 | RHEUMATIC MULT VLV DZ UNSP |
| ICD 10 | I09 | OTH RHEUMATIC HEART DISEASES |
| ICD 10 | I09.0 | RHEUMATIC MYOCARDITIS |
| ICD 10 | I09.1 | RHEUMATIC DZ ENDOCARDIUM VLV UNSP |
| ICD 10 | I09.2 | CHR RHEUMATIC PERICARDITIS |
| ICD 10 | I09.8 | OTH SPECIFIED RHEUMATIC HEART DZ |
| ICD 10 | I09.81 | RHEUMATIC HRT FAIL |
| ICD 10 | I09.89 | OTH SPEC RHEUMATIC HRT DZ |
| ICD 10 | I09.9 | RHEUMATIC HRT DZ UNSP |
| ICD 10 | I10 | ESSENTIAL (PRIM) HTN |
| ICD 10 | I11 | HYPERTENSIVE HEART DISEASE |
| ICD 10 | I11.0 | HTN HRT DZ W HRT FAIL |
| ICD 10 | I11.9 | HTN HRT DZ WO HRT FAIL |
| ICD 10 | I12 | HYPERTENSIVE CHR KIDNEY DISEASE |
| ICD 10 | I12.0 | HYPERTENSV CHR KIDNY DZ W STG 5 ESR |
| ICD 10 | I12.9 | HYPRTN CHR KIDNY DZ W STG 1-4/UNSP |
| ICD 10 | I13 | HYPERTENSIV HEART&CHR KIDNEY DZ |
| ICD 10 | I13.0 | HYPE HRT&CKD W HRT FLR&STG1-4CKD,UN |
| ICD 10 | I13.1 | HYP HRT&CHRNC KDNY DZ WO HRT FAILR |
| ICD 10 | I13.10 | HYP HRT&CKD WO HRTFLR W STG1-4 CKD |
| ICD 10 | I13.11 | HYPR HRT&CKD WO HRT FLR W STG5 CKD |
| ICD 10 | I13.2 | HYPER HRT&CKD W HRT FLR&W STG 5 CKD |
| ICD 10 | I15 | SECONDARY HYPERTENSION |
| ICD 10 | I15.0 | RENOVASC HTN |
| ICD 10 | I15.1 | HTN SEC TO OTH RENAL DISORD |
| ICD 10 | I15.2 | HTN SEC TO ENDOCR DISORD |
| ICD 10 | I15.8 | OTH SEC HTN |
| ICD 10 | I15.9 | SEC HTN UNSP |
| ICD 10 | I16 | HYPERTENSIVE CRISIS |
| ICD 10 | I16.0 | HTN URGENCY |
| ICD 10 | I16.1 | HTN EMERGENCY |
| ICD 10 | I16.9 | HTN CRISIS UNSP |
| ICD 10 | I20 | ANGINA PECTORIS |
| ICD 10 | I20.0 | UNSTABLE ANG |
| ICD 10 | I20.1 | ANG PCTRS W DOCUMENTED SPASM |
| ICD 10 | I20.8 | OTH FORMS ANG PCTRS |
| ICD 10 | I20.9 | ANG PCTRS UNSP |
| ICD 10 | I21 | STEMI&NSTEMI |
| ICD 10 | I21.0 | STEMI OF ANTERIOR WALL |
| ICD 10 | I21.01 | STEMI INVLVNG L MAIN CORONRY ARTRY |
| ICD 10 | I21.02 | STEMI INVLNG L ANT DESCDNG COR ART |
| ICD 10 | I21.09 | STEMI INVLNG OTH COR ARTY ANTE WALL |
| ICD 10 | I21.1 | STEMI OF INFERIOR WALL |
| ICD 10 | I21.11 | STEMI INVOLVING R CORONARY ARTERY |
| ICD 10 | I21.19 | STEMI INVLNG OTH COR ARTY INFE WALL |
| ICD 10 | I21.2 | STEMI OF OTH SITES |
| ICD 10 | I21.21 | STEMI INVLVNG L CIRCUM CORON ARTRY |
| ICD 10 | I21.29 | STEMI INVOLVING OTH SITES |
| ICD 10 | I21.3 | STEMI OF UNSP SITE |
| ICD 10 | I21.4 | NON-ST ELEV (NSTEMI) MYCARD INFRC |
| ICD 10 | I21.9 | AC MYCARD INFRC UNSP |
| ICD 10 | I21.A1 | MYCARD INFRC TYPE 2 |
| ICD 10 | I21.A9 | OTH MYCARD INFRC TYPE |
| ICD 10 | I22 | SUBSQ STEMI AND NSTEMI |
| ICD 10 | I22.0 | SUBSQ STEMI OF ANTERIOR WALL |
| ICD 10 | I22.1 | SUBSQ STEMI OF INFERIOR WALL |
| ICD 10 | I22.2 | SUBSQ NSTEMI |
| ICD 10 | I22.8 | SUBSQ STEMI OF OTH SITES |
| ICD 10 | I22.9 | SUBSQ STEMI OF UNSP SITE |
| ICD 10 | I23 | STEMI&NSTEMI MYOCARD INFARCT <=28 D |
| ICD 10 | I23.0 | HEMOPERICARDM CRNT CMPL FG ACUTE MI |
| ICD 10 | I23.1 | ATRIAL SEPTAL DEFECT,FOLLW ACUTE MI |
| ICD 10 | I23.2 | VENTRICULR SEPTAL DEFCT,FG ACUTE MI |
| ICD 10 | I23.3 | RUPTR CARDIAC WL WO HPC FOLL AMI |
| ICD 10 | I23.4 | RUPTURE CHORDAE TENDINEAE FOLLW AMI |
| ICD 10 | I23.5 | RUPTUR OF PAPILLARY MUSCLE FOLL AMI |
| ICD 10 | I23.6 | THRMB ATRM,AURCL APP,&VENT FOLL AMI |
| ICD 10 | I23.7 | POSTINFRC ANG |
| ICD 10 | I23.8 | OTH CRNT COMP FOL AC MYCARD INFRC |
| ICD 10 | I24 | OTH ACUTE ISCHEMIC HEART DISEASES |
| ICD 10 | I24.0 | AC COR THRMBO NOT RSLT IN MYCARD INFRC |
| ICD 10 | I24.1 | DRESSLER'S SYND |
| ICD 10 | I24.8 | OTH FORMS AC ISCHEM HRT DZ |
| ICD 10 | I24.9 | AC ISCHEM HRT DZ UNSP |
| ICD 10 | I25 | CHR ISCHEMIC HEART DISEASE |
| ICD 10 | I25.1 | ATHEROSC HRT DZ NATV CORONRY ARTERY |
| ICD 10 | I25.10 | ATHR HRT DZ NTV CORNRY ARTRY WO AP |
| ICD 10 | I25.11 | ATHSCL HRT DZ NTV COR ART W AP |
| ICD 10 | I25.110 | ATHSCL HRT DZ NTV COR ART UNSTB AP |
| ICD 10 | I25.111 | ATHSCL HRT DZ NTV COR ART AP W SPM |
| ICD 10 | I25.118 | ATHSCL HRT DZ NTV COR ART OTH AP |
| ICD 10 | I25.119 | ATHSCL HRT DZ NTV COR ART UNSP AP |
| ICD 10 | I25.2 | OLD MYCARD INFRC |
| ICD 10 | I25.3 | ANEURYSM HRT |
| ICD 10 | I25.4 | CORONARY ARTERY ANEURYSM&DISSECTION |
| ICD 10 | I25.41 | COR ART ANEURYSM |
| ICD 10 | I25.42 | COR ART DISSECTION |
| ICD 10 | I25.5 | ISCHEM CARDIOMYOPATHY |
| ICD 10 | I25.6 | SILENT MYCARD ISCHEMIA |
| ICD 10 | I25.7 | ATHSCL,CABG&COR ART XPLNT HRT ANGINA |
| ICD 10 | I25.70 | ATHSCL, CABG, UNSP W ANG PCTRS |
| ICD 10 | I25.700 | ATHSCL,CABG,UNSP W UNST ANGINA |
| ICD 10 | I25.701 | ATHSCL,CABG,UNSP W ANG PCTRS SPM |
| ICD 10 | I25.708 | ATHSCL,CABG,UNSP W OTH FORMS ANG |
| ICD 10 | I25.709 | ATHSCL,CABG,UNSP W UNSP ANGINA |
| ICD 10 | I25.71 | ATHSCL,AUTOL VEIN BYP W/ANGINA |
| ICD 10 | I25.710 | ATHSCL,AUTOL VEIN CABG W UNST ANG |
| ICD 10 | I25.711 | ATHSCL,AUTOL VN CABG W ANG W SPM |
| ICD 10 | I25.718 | ATHSCL,AUTOL VEIN CABG W OTH ANGI |
| ICD 10 | I25.719 | ATHSCL,AUTOL VEIN CABG W UNSP ANG |
| ICD 10 | I25.72 | ATHSCL,AUTOL ARTERY CABG W ANGINA |
| ICD 10 | I25.720 | ATHSCL,AUTOL ARTRY CABG W UNST ANG |
| ICD 10 | I25.721 | ATHSCL,AUTOL ARTRY CABG W ANGINA |
| ICD 10 | I25.728 | ATHSCL,AUTOL ARTRY CABG W OTH ANG |
| ICD 10 | I25.729 | ATHSCL,AUTOL CABG W UNSP ANGINA |
| ICD 10 | I25.73 | ATHSCL,NONAUTOGL BIO CABG W ANGINA |
| ICD 10 | I25.730 | ATHSCL,NAUTOGL BIO CABG W UNST ANG |
| ICD 10 | I25.731 | ATHSCL,NONAUTOGL BIO CABG W ANGINA |
| ICD 10 | I25.738 | ATHSCL,NAUTOGL BIO CABG W OTH ANGI |
| ICD 10 | I25.739 | ATHSCL,NAUTOGL BIO CABG W UNSP ANGI |
| ICD 10 | I25.75 | ATHSCL,NTV ART, TRNSPL HRT W ANGI |
| ICD 10 | I25.750 | ATHSCL,NTV ART,TRN HRT W UNST ANG |
| ICD 10 | I25.751 | ATHSCL,NATV ART,TRNSPL HRT W SPSM |
| ICD 10 | I25.758 | ATHSCL,NTV ART,TRNS HRT W OTH ANG |
| ICD 10 | I25.759 | ATHSCL,NTV ART,TRNS HRT W UNSP ANG |
| ICD 10 | I25.76 | ATHSCL,BYP GRFT,XPLNT HRT W ANG PCTRS |
| ICD 10 | I25.760 | ATHSCL,BYP GRFT,XPLNT HRT W UNST ANG |
| ICD 10 | I25.761 | ATHSCL,BYP GRFT,XPLNT HRT W ANG SPM |
| ICD 10 | I25.768 | ATHSCL,BYP GRFT,XPLNT HRT W OTH ANG |
| ICD 10 | I25.769 | ATHSCL,BYP GRFT,XPLNT HRT W UNSP ANG |
| ICD 10 | I25.79 | ATHSCL,OTH CABG W ANGINA PECTORIS |
| ICD 10 | I25.790 | ATHSCL,OTH COR BYP W UNSTB ANGINA |
| ICD 10 | I25.791 | ATHSCL,OTH CABG W ANGINA W SPSM |
| ICD 10 | I25.798 | ATHSCL,OTH CABG W OTH ANGINA |
| ICD 10 | I25.799 | ATHSCL,OTH CABG W UNSP ANGINA PECT |
| ICD 10 | I25.8 | OTH FORMS OF CHRNC ISCHEMC HEART DZ |
| ICD 10 | I25.81 | ATHSCL,OTH COR VESSELS WO ANGINA |
| ICD 10 | I25.810 | ATHSCL CABG WO ANGINA PECTORIS |
| ICD 10 | I25.811 | ATHSCL,NTV ART,TRNS HRT WO ANGNA |
| ICD 10 | I25.812 | ATHSCL,COR ART BYP,XPLNT HRT WO ANG |
| ICD 10 | I25.82 | CHR TOTAL OCCLS COR ART |
| ICD 10 | I25.83 | COR ATHSCL D/T LIPID RICH PLAQUE |
| ICD 10 | I25.84 | COR ATHSCL D/T CALCIFIED COR LESION |
| ICD 10 | I25.89 | OTH FORMS CHR ISCHEM HRT DZ |
| ICD 10 | I25.9 | CHR ISCHEM HRT DZ UNSP |
| ICD 10 | I26 | PULMONARY EMBOLISM |
| ICD 10 | I26.0 | PULMON EMBOLS W ACUTE COR PULMONALE |
| ICD 10 | I26.01 | SEPTIC PULM EMBLSM W AC COR PULMONALE |
| ICD 10 | I26.02 | SADDL EMBLS PULM ART W AC COR PUL |
| ICD 10 | I26.09 | OTH PULM EMBLSM W AC COR PULMONALE |
| ICD 10 | I26.9 | PULMONRY EMB WO ACUTE COR PULMONAL |
| ICD 10 | I26.90 | SEPTIC PULM EMBLSM WO AC COR PULMONALE |
| ICD 10 | I26.92 | SADDL EMBLS PULM ART WO ACT COR PU |
| ICD 10 | I26.93 | SINGL SUBSEGM PUL EMBOL WO COR PUL |
| ICD 10 | I26.94 | MULT SUBSEGM PUL EMBOL WO COR PUL |
| ICD 10 | I26.99 | OTH PULM EMBLSM WO AC COR PULMONALE |
| ICD 10 | I27 | OTH PULMONARY HEART DISEASES |
| ICD 10 | I27.0 | PRIM PULM HTN |
| ICD 10 | I27.1 | KYPHOSCOLIOTIC HRT DZ |
| ICD 10 | I27.2 | OTH SECONDARY PULMONARY HYPERTENSN |
| ICD 10 | I27.20 | PULM HTN UNSP |
| ICD 10 | I27.21 | SEC PULM ART HTN |
| ICD 10 | I27.22 | PULM HTN D/T L HRT DZ |
| ICD 10 | I27.23 | PULM HTN D/T LUNG DZ&HYPOXIA |
| ICD 10 | I27.24 | CHR THRMBOOEMBOLIC PULM HTN |
| ICD 10 | I27.29 | OTH SEC PULM HTN |
| ICD 10 | I27.8 | OTH SPECIFIED PULMONARY HEART DZ |
| ICD 10 | I27.81 | COR PULMONALE (CHR) |
| ICD 10 | I27.82 | CHR PULM EMBLSM |
| ICD 10 | I27.83 | EISENMENGER'S SYND |
| ICD 10 | I27.89 | OTH SPEC PULM HRT DZ |
| ICD 10 | I27.9 | PULM HRT DZ UNSP |
| ICD 10 | I28 | OTH DISEASES OF PULMONARY VESSELS |
| ICD 10 | I28.0 | AV FISTULA PULM VESS |
| ICD 10 | I28.1 | ANEURYSM PULM ART |
| ICD 10 | I28.8 | OTH DZ PULM VESS |
| ICD 10 | I28.9 | DZ PULM VESS UNSP |
| ICD 10 | I30 | ACUTE PERICARDITIS |
| ICD 10 | I30.0 | AC NOSPEC IDIO PERICARDITIS |
| ICD 10 | I30.1 | INFCTIVE PERICARDITIS |
| ICD 10 | I30.8 | OTH FORMS AC PERICARDITIS |
| ICD 10 | I30.9 | AC PERICARDITIS UNSP |
| ICD 10 | I31 | OTH DISEASES OF PERICARDIUM |
| ICD 10 | I31.0 | CHR ADHESIVE PERICARDITIS |
| ICD 10 | I31.1 | CHR CONSTRIV PERICARDITIS |
| ICD 10 | I31.2 | HEMOPERICARDIUM NEC |
| ICD 10 | I31.3 | PERICRD EFFUSN (NONINFLM) |
| ICD 10 | I31.4 | CARD TAMPONADE |
| ICD 10 | I31.8 | OTH SPEC DZ PERICARDIUM |
| ICD 10 | I31.9 | DZ PERICARDIUM UNSP |
| ICD 10 | I32 | PERICARDITIS IN DZ CLS ELSWHR |
| ICD 10 | I33 | ACUTE AND SUBACUTE ENDOCARDITIS |
| ICD 10 | I33.0 | AC&SUBAC INFCTIVE ENDOCARDITIS |
| ICD 10 | I33.9 | AC&SUBAC ENDOCARDITIS UNSP |
| ICD 10 | I34 | NONRHEUMATIC MITRAL VALVE DISORDERS |
| ICD 10 | I34.0 | NONRHEUMATIC MITRAL (VLV) INSUFF |
| ICD 10 | I34.1 | NONRHEUMATIC MITRAL (VLV) PROLAPSE |
| ICD 10 | I34.2 | NONRHEUMATIC MITRAL (VLV) STEN |
| ICD 10 | I34.8 | OTH NONRHEUMATIC MITRAL VLV DISORD |
| ICD 10 | I34.9 | NONRHEUMATIC MITRAL VLV DISORD UNSP |
| ICD 10 | I35 | NONRHEUMATIC AORTIC VALVE DISORDERS |
| ICD 10 | I35.0 | NONRHEUMATIC AORT (VLV) STEN |
| ICD 10 | I35.1 | NONRHEUMATIC AORT (VLV) INSUFF |
| ICD 10 | I35.2 | NONRHEUMATIC AORT (VLV) STEN W INSUFF |
| ICD 10 | I35.8 | OTH NONRHEUMATIC AORT VLV DISORD |
| ICD 10 | I35.9 | NONRHEUMATIC AORT VLV DISORD UNSP |
| ICD 10 | I36 | NONRHEUMATIC TRICUSPID VALVE DSRDRS |
| ICD 10 | I36.0 | NONRHEUMATIC TRICUS (VLV) STEN |
| ICD 10 | I36.1 | NONRHEUMATIC TRICUS (VLV) INSUFF |
| ICD 10 | I36.2 | NONRHEUMATIC TRICUS (VLV) STEN W INSUFF |
| ICD 10 | I36.8 | OTH NONRHEUMATIC TRICUS VLV DISORD |
| ICD 10 | I36.9 | NONRHEUMATIC TRICUS VLV DISORD UNSP |
| ICD 10 | I37 | NONRHEUMATIC PULMONARY VALVE DSRDRS |
| ICD 10 | I37.0 | NONRHEUMATIC PULM VLV STEN |
| ICD 10 | I37.1 | NONRHEUMATIC PULM VLV INSUFF |
| ICD 10 | I37.2 | NONRHEUMATIC PULM VLV STEN W INSUFF |
| ICD 10 | I37.8 | OTH NONRHEUMATIC PULM VLV DISORD |
| ICD 10 | I37.9 | NONRHEUMATIC PULM VLV DISORD UNSP |
| ICD 10 | I38 | ENDOCARDITIS VLV UNSP |
| ICD 10 | I39 | ENDOCARDITIS&HEART VALV DSRDR DZ CE |
| ICD 10 | I40 | ACUTE MYOCARDITIS |
| ICD 10 | I40.0 | INFCTIVE MYOCARDITIS |
| ICD 10 | I40.1 | ISOLATED MYOCARDITIS |
| ICD 10 | I40.8 | OTH AC MYOCARDITIS |
| ICD 10 | I40.9 | AC MYOCARDITIS UNSP |
| ICD 10 | I41 | MYOCARDITIS IN DZ CLS ELSWHR |
| ICD 10 | I42 | CARDIOMYOPATHY |
| ICD 10 | I42.0 | DILATED CARDIOMYOPATHY |
| ICD 10 | I42.1 | OBSTRUCTIVE HYPERTROPHIC CARDIOMYOPATHY |
| ICD 10 | I42.2 | OTH HYPERTROPHIC CARDIOMYOPATHY |
| ICD 10 | I42.3 | ENDOMYCARD (EOSINOPHILIC) DZ |
| ICD 10 | I42.4 | ENDOCARDIAL FIBROELASTOSIS |
| ICD 10 | I42.5 | OTH RESTR CARDIOMYOPATHY |
| ICD 10 | I42.6 | ALCOHOLIC CARDIOMYOPATHY |
| ICD 10 | I42.7 | CARDIOMYOPATHY D/T DRUG&EXT AGENT |
| ICD 10 | I42.8 | OTH CARDIOMYOPATHIES |
| ICD 10 | I42.9 | CARDIOMYOPATHY UNSP |
| ICD 10 | I43 | CARDIOMYOPATHY IN DZ CLS ELSWHR |
| ICD 10 | I44 | ATRIOVENTRICULAR&LT BNDL-BRANCH BLK |
| ICD 10 | I44.0 | ATRIV BLOCK 1ST DEGREE |
| ICD 10 | I44.1 | ATRIV BLOCK 2ND DEGREE |
| ICD 10 | I44.2 | ATRIV BLOCK CMPL |
| ICD 10 | I44.3 | OTH&UNSP ATRIOVENTRICULAR BLOCK |
| ICD 10 | I44.30 | UNSP ATRIV BLOCK |
| ICD 10 | I44.39 | OTH ATRIV BLOCK |
| ICD 10 | I44.4 | L ANT FASCICULAR BLOCK |
| ICD 10 | I44.5 | L POSTR FASCICULAR BLOCK |
| ICD 10 | I44.6 | OTH&UNSP FASCICULAR BLOCK |
| ICD 10 | I44.60 | UNSP FASCICULAR BLOCK |
| ICD 10 | I44.69 | OTH FASCICULAR BLOCK |
| ICD 10 | I44.7 | L BUNDLE-BRANCH BLOCK UNSP |
| ICD 10 | I45 | OTH CONDUCTION DISORDERS |
| ICD 10 | I45.0 | R FASCICULAR BLOCK |
| ICD 10 | I45.1 | OTH&UNSP R BUNDLE-BRANCH BLOCK |
| ICD 10 | I45.10 | UNSP R BUNDLE-BRANCH BLOCK |
| ICD 10 | I45.19 | OTH R BUNDLE-BRANCH BLOCK |
| ICD 10 | I45.2 | BIFASCICULAR BLOCK |
| ICD 10 | I45.3 | TRIFASCICULAR BLOCK |
| ICD 10 | I45.4 | NOSPEC INTRAVENTRICULAR BLOCK |
| ICD 10 | I45.5 | OTH SPEC HRT BLOCK |
| ICD 10 | I45.6 | PRE-EXCITATION SYND |
| ICD 10 | I45.8 | OTH SPECIFIED CONDUCTION DISORDERS |
| ICD 10 | I45.81 | LNG QT SYND |
| ICD 10 | I45.89 | OTH SPEC CONDCT DISORD |
| ICD 10 | I45.9 | CONDCT DISORD UNSP |
| ICD 10 | I46 | CARDIAC ARREST |
| ICD 10 | I46.2 | CARD ARREST D/T UNDERLY CARD COND |
| ICD 10 | I46.8 | CARD ARREST D/T OTH UNDERLY COND |
| ICD 10 | I46.9 | CARD ARREST CAUSE UNSP |
| ICD 10 | I47 | PAROXYSMAL TACHYCARDIA |
| ICD 10 | I47.0 | RE-ENTRY VENTRICULAR ARRHYTHMIA |
| ICD 10 | I47.1 | SUPRAVENTRICULAR TACHYCARDIA |
| ICD 10 | I47.2 | VENTRICULAR TACHYCARDIA |
| ICD 10 | I47.9 | PAROXYSMAL TACHYCARDIA UNSP |
| ICD 10 | I48 | ATRIAL FIBRILLATION AND FLUTTER |
| ICD 10 | I48.0 | PAROXYSMAL ATRIAL FIBRILLATION |
| ICD 10 | I48.1 | PERSISTENT ATRIAL FIBRILLATION |
| ICD 10 | I48.11 | LNGSTANDING PERST ATRIAL FIBRILLATION |
| ICD 10 | I48.19 | OTH PERST ATRIAL FIBRILLATION |
| ICD 10 | I48.2 | CHR ATRIAL FIBRILLATION |
| ICD 10 | I48.20 | CHR ATRIAL FIBRILLATION UNSP |
| ICD 10 | I48.21 | PERMANENT ATRIAL FIBRILLATION |
| ICD 10 | I48.3 | TYPICAL ATRIAL FLUTTER |
| ICD 10 | I48.4 | ATYP ATRIAL FLUTTER |
| ICD 10 | I48.9 | UNSPEC ATRIAL FIBRILLATN&ATRIAL FLU |
| ICD 10 | I48.91 | UNSP ATRIAL FIBRILLATION |
| ICD 10 | I48.92 | UNSP ATRIAL FLUTTER |
| ICD 10 | I49 | OTH CARDIAC ARRHYTHMIAS |
| ICD 10 | I49.0 | VENTRICULAR FIBRILLATION&FLUTTER |
| ICD 10 | I49.01 | VENTRICULAR FIBRILLATION |
| ICD 10 | I49.02 | VENTRICULAR FLUTTER |
| ICD 10 | I49.1 | ATRIAL PREM DEPOLARIZATION |
| ICD 10 | I49.2 | JNCTAL PREM DEPOLARIZATION |
| ICD 10 | I49.3 | VENTRICULAR PREM DEPOLARIZATION |
| ICD 10 | I49.4 | OTH&UNSP PREMATURE DEPOLARIZATION |
| ICD 10 | I49.40 | UNSP PREM DEPOLARIZATION |
| ICD 10 | I49.49 | OTH PREM DEPOLARIZATION |
| ICD 10 | I49.5 | SICK SINU SYND |
| ICD 10 | I49.8 | OTH SPEC CARD ARRHYTHMIAS |
| ICD 10 | I49.9 | CARD ARRHYTHMIA UNSP |
| ICD 10 | I50 | HEART FAIL |
| ICD 10 | I50.1 | L VENTRICULAR FAIL UNSP |
| ICD 10 | I50.2 | SYSTOLIC (CONGESTIVE) HEART FAIL |
| ICD 10 | I50.20 | UNSP SYSTOLIC (CONGES) HRT FAIL |
| ICD 10 | I50.21 | AC SYSTOLIC (CONGES) HRT FAIL |
| ICD 10 | I50.22 | CHR SYSTOLIC (CONGES) HRT FAIL |
| ICD 10 | I50.23 | AC ON CHR SYSTOLIC (CONGES) HRT FAIL |
| ICD 10 | I50.3 | DIASTOLIC (CONGSTV) HEART FAIL |
| ICD 10 | I50.30 | UNSP DIASTOLIC (CONGES) HRT FAIL |
| ICD 10 | I50.31 | AC DIASTOLIC (CONGES) HRT FAIL |
| ICD 10 | I50.32 | CHR DIASTOLIC (CONGES) HRT FAIL |
| ICD 10 | I50.33 | AC ON CHR DIASTOLIC (CONGES) HRT FAIL |
| ICD 10 | I50.4 | COMBND SYSTOLC&DIASTOLC HRT FAIL |
| ICD 10 | I50.40 | UNSP COMBN SYSTOLC&DIASTOLC HRT FAIL |
| ICD 10 | I50.41 | ACUTE COMB SYSTLC&DIASTLC HRT FAIL |
| ICD 10 | I50.42 | CHRNC COMB SYSTLC&DIASTLC HRT FAIL |
| ICD 10 | I50.43 | ACUTE CHRNC COMB SYST&DIAS HRT FALR |
| ICD 10 | I50.810 | R HRT FAIL UNSP |
| ICD 10 | I50.811 | AC R HRT FAILURE |
| ICD 10 | I50.812 | CHR R HRT FAIL |
| ICD 10 | I50.813 | AC ON CHR R HRT FAIL |
| ICD 10 | I50.814 | R HRT FAIL D/T L HRT FAIL |
| ICD 10 | I50.82 | BIVENTRICULAR HRT FAIL |
| ICD 10 | I50.83 | HI OUTPUT HRT FAIL |
| ICD 10 | I50.84 | END STG HRT FAIL |
| ICD 10 | I50.89 | OTH HRT FAIL |
| ICD 10 | I50.9 | HRT FAIL UNSP |
| ICD 10 | I51 | COMPLCTNS&ILL-DEFND DESCR OF HRT DZ |
| ICD 10 | I51.0 | CARD SEPTAL DEFECT ACQ |
| ICD 10 | I51.1 | RUPT CHOR TEND NEC |
| ICD 10 | I51.2 | RUPT PAPILLARY MSL NEC |
| ICD 10 | I51.3 | INTRCRD THRMBO NEC |
| ICD 10 | I51.4 | MYOCARDITIS UNSP |
| ICD 10 | I51.5 | MYCARD DEGEN |
| ICD 10 | I51.7 | CARDIOMEGALY |
| ICD 10 | I51.8 | OTH ILL-DEFINED HEART DISEASES |
| ICD 10 | I51.81 | TAKOTSUBO SYND |
| ICD 10 | I51.89 | OTH ILL-DEFINED HRT DZ |
| ICD 10 | I51.9 | HRT DZ UNSP |
| ICD 10 | I52 | OTH HRT DISORD IN DZ CLS ELSWHR |
| ICD 10 | I60 | NONTRAUMATIC SUBARACHNOID HEM |
| ICD 10 | I60.0 | NTSAH FR CAROTID SIPHON&BIFURCATION |
| ICD 10 | I60.00 | NTSAH FR CAROTID UNSP SIPHN&BIFURCTN |
| ICD 10 | I60.01 | NTSAH FR CAROTID R SIPHN&BIFURCATN |
| ICD 10 | I60.02 | NTSAH FR CAROTID L SIPHN&BIFURCATN |
| ICD 10 | I60.1 | NTSAH FR MID CEREBRAL ARTERY |
| ICD 10 | I60.10 | NTSAH FR UNSP MID CEREBRAL ARTERY |
| ICD 10 | I60.11 | NONTRM SUBARC HEMRG FR R MID CEREB ART |
| ICD 10 | I60.12 | NONTRM SUBARC HEMRG FR L MID CEREB ART |
| ICD 10 | I60.2 | NTSAH FR ANTERIOR COMMUNCTNG ARTERY |
| ICD 10 | I60.20 | NTSAH FR UNSP ANTERIOR COMM ARTERY |
| ICD 10 | I60.21 | NTSAH FR R ANTERIOR COMMUN ARTERY |
| ICD 10 | I60.22 | NTSAH FR L ANTERIOR COMMUN ARTERY |
| ICD 10 | I60.3 | NTSAH FR POSTERIOR COMMNCTNG ARTERY |
| ICD 10 | I60.30 | NTSAH FR UNSP POSTERIOR COMM ARTERY |
| ICD 10 | I60.31 | NTSAH FR R POSTERIOR COMMUN ARTERY |
| ICD 10 | I60.32 | NTSAH FR L POSTERIOR COMMUN ARTERY |
| ICD 10 | I60.4 | NONTRM SUBARC HEMRG FR BASILAR ART |
| ICD 10 | I60.5 | NTSAH FROM VERTEBRAL ARTERY |
| ICD 10 | I60.50 | NONTRM SUBARC HEMRG FR UNSP VERT ART |
| ICD 10 | I60.51 | NONTRM SUBARC HEMRG FR R VERT ART |
| ICD 10 | I60.52 | NONTRM SUBARC HEMRG FR L VERT ART |
| ICD 10 | I60.6 | NONTRM SUBARC HEMRG FR OTH INTRCRN ART |
| ICD 10 | I60.7 | NONTRM SUBARC HEMRG FR UNSP INTRCRN ART |
| ICD 10 | I60.8 | OTH NONTRM SUBARC HEMRG |
| ICD 10 | I60.9 | NONTRM SUBARC HEMRG UNSP |
| ICD 10 | I61 | NONTRAUMATIC INTRACEREBRAL HEMORRHG |
| ICD 10 | I61.0 | NONTRM INTRCEREB HEMRG IN HEMIS SUBCO |
| ICD 10 | I61.1 | NONTRM INTRCEREB HEMRG IN HEMIS CORTICAL |
| ICD 10 | I61.2 | NONTRM INTRCEREB HEMRG IN HEMIS UNSP |
| ICD 10 | I61.3 | NONTRM INTRCEREB HEMRG IN BRN STEM |
| ICD 10 | I61.4 | NONTRM INTRCEREB HEMRG IN CERBEL |
| ICD 10 | I61.5 | NONTRM INTRCEREB HEMRG INTRAVENTRICULAR |
| ICD 10 | I61.6 | NONTRM INTRCEREB HEMRG MULT LOC |
| ICD 10 | I61.8 | OTH NONTRM INTRCEREB HEMRG |
| ICD 10 | I61.9 | NONTRM INTRCEREB HEMRG UNSP |
| ICD 10 | I62 | OTH&UNSP NONTRAUMTC INTRACRANL HEM |
| ICD 10 | I62.0 | NONTRAUMATIC SUBDURAL HEMORRHAGE |
| ICD 10 | I62.00 | NONTRM SUBDR HEMRG UNSP |
| ICD 10 | I62.01 | NONTRM AC SUBDR HEMRG |
| ICD 10 | I62.02 | NONTRM SUBAC SUBDR HEMRG |
| ICD 10 | I62.03 | NONTRM CHR SUBDR HEMRG |
| ICD 10 | I62.1 | NONTRM EXTRADURAL HEMRG |
| ICD 10 | I62.9 | NONTRM INTRCRN HEMRG UNSP |
| ICD 10 | I63 | CEREBRAL INFARCTION |
| ICD 10 | I63.0 | CI D/T THRMBO OF PRECERBRL ARTERIE |
| ICD 10 | I63.00 | CEREB INFRC D/T THRMBO UNSP PRECEREB ART |
| ICD 10 | I63.01 | CI D/T THRMBOIS OF VERTEBRAL ARTERY |
| ICD 10 | I63.011 | CEREB INFRC D/T THRMBO R VERT ART |
| ICD 10 | I63.012 | CEREB INFRC D/T THRMBO L VERT ART |
| ICD 10 | I63.013 | CEREB INFRC D/T THRMBO BILAT VERT ART |
| ICD 10 | I63.019 | CEREB INFRC D/T THRMBO UNSP VERT ART |
| ICD 10 | I63.02 | CEREB INFRC D/T THRMBO BASILAR ART |
| ICD 10 | I63.03 | CI D/T THRMBOOSIS OF CAROTID ARTERY |
| ICD 10 | I63.031 | CEREB INFRC D/T THRMBO R CRTD ART |
| ICD 10 | I63.032 | CEREB INFRC D/T THRMBO L CRTD ART |
| ICD 10 | I63.033 | CEREB INFRC D/T THRMBO BILAT CRTD ART |
| ICD 10 | I63.039 | CEREB INFRC D/T THRMBO UNSP CRTD ART |
| ICD 10 | I63.09 | CEREB INFRC D/T THRMBO OTH PRECEREB ART |
| ICD 10 | I63.1 | CI D/T EMBOLISM PRECEREBRAL ARTRIES |
| ICD 10 | I63.10 | CEREB INFRC D/T EMBLSM UNSP PRECEREB ART |
| ICD 10 | I63.11 | CI D/T EMBOLISM OF VERTEBRAL ARTERY |
| ICD 10 | I63.111 | CEREB INFRC D/T EMBLSM R VERT ART |
| ICD 10 | I63.112 | CEREB INFRC D/T EMBLSM L VERT ART |
| ICD 10 | I63.113 | CEREB INFRC D/T EMBLSM BILAT VERT ART |
| ICD 10 | I63.119 | CEREB INFRC D/T EMBLSM UNSP VERT ART |
| ICD 10 | I63.12 | CEREB INFRC D/T EMBLSM BASILAR ART |
| ICD 10 | I63.13 | CI D/T EMBOLISM OF CAROTID ARTERY |
| ICD 10 | I63.131 | CEREB INFRC D/T EMBLSM R CRTD ART |
| ICD 10 | I63.132 | CEREB INFRC D/T EMBLSM L CRTD ART |
| ICD 10 | I63.133 | CEREB INFRC D/T EMBLSM BILAT CRTD ART |
| ICD 10 | I63.139 | CEREB INFRC D/T EMBLSM UNSP CRTD ART |
| ICD 10 | I63.19 | CEREB INFRC D/T EMBLSM OTH PRECEREB ART |
| ICD 10 | I63.2 | CI D/T UNSP OCCLUSIN PRECRBRL ARTERI |
| ICD 10 | I63.20 | CI D/T UNSP OCLSN,UNSP PRCRBRL ARTERI |
| ICD 10 | I63.21 | CI D/T UNSP OCLSN OF VERTEBRL ARTERI |
| ICD 10 | I63.211 | CI D/T UNSP OCCL/STEN, R VERT ARTERY |
| ICD 10 | I63.212 | CI D/T UNSP OCCL/STEN, L VERT ARTERY |
| ICD 10 | I63.213 | CI D/T UNSP OCL/STEN BI VERTB ARTERY |
| ICD 10 | I63.219 | CI D/T UNSP OCLSN/STN, UNSP VERT ARTR |
| ICD 10 | I63.22 | CI D/T UNSP OCCL/STEN BASILAR ARTERY |
| ICD 10 | I63.23 | CI D/T UNSP OCLSN OF CAROTID ARTERIE |
| ICD 10 | I63.231 | CI D/T UNSP OCLSN OF R CAROTID ARTE |
| ICD 10 | I63.232 | CI D/T UNSP OCLSN OF L CAROTID ARTE |
| ICD 10 | I63.233 | CI D/T UNSP OCL/STN BIL CARTD ARTERY |
| ICD 10 | I63.239 | CI D/T UNSP OCLSN/STEN,UNSP CAR ARTER |
| ICD 10 | I63.29 | CI D/T UNSP OCLSN,OTH PRECERBRL ARTR |
| ICD 10 | I63.3 | CI D/T THRMBOIS OF CEREBRL ARTERIES |
| ICD 10 | I63.30 | CEREB INFRC D/T THRMBO UNSP CEREB ART |
| ICD 10 | I63.31 | CI D/T THRMBO MIDDL CEREBRL ARTERY |
| ICD 10 | I63.311 | CEREB INFRC D/T THRMBO R MID CEREB ART |
| ICD 10 | I63.312 | CEREB INFRC D/T THRMBO L MID CEREB ART |
| ICD 10 | I63.313 | CI D/T THRMBO BIL MIDDL CEREB ARTER |
| ICD 10 | I63.319 | CI D/T THRMB OF UNSP MID CERBR ARTRY |
| ICD 10 | I63.32 | CI D/T THRMB OF ANTERI CERBRL ARTRY |
| ICD 10 | I63.321 | CEREB INFRC D/T THRMBO R ANT CEREB ART |
| ICD 10 | I63.322 | CEREB INFRC D/T THRMBO L ANT CEREB ART |
| ICD 10 | I63.323 | CI D/T THRMBO BIL ANTER CEREB ART |
| ICD 10 | I63.329 | CI D/T THRMB OF UNSP ANT CRBRL ARTRY |
| ICD 10 | I63.33 | CI D/T THRMB OF POSTERI CRBRL ARTRY |
| ICD 10 | I63.331 | CEREB INFRC D/T THRMBO R POSTR CEREB ART |
| ICD 10 | I63.332 | CEREB INFRC D/T THRMBO L POSTR CEREB ART |
| ICD 10 | I63.333 | CI D/T THRMBO BIL POST CEREB ARTERY |
| ICD 10 | I63.339 | CI D/T THRMB OF UNSP POST CRBRL ARTR |
| ICD 10 | I63.34 | CI D/T THRMBO OF CEREBELLAR ARTERY |
| ICD 10 | I63.341 | CEREB INFRC D/T THRMBO R CEREBEL ART |
| ICD 10 | I63.342 | CEREB INFRC D/T THRMBO L CEREBEL ART |
| ICD 10 | I63.343 | CEREB INFRC D/T THRMBO BILAT CEREBEL ART |
| ICD 10 | I63.349 | CEREB INFRC D/T THRMBO UNSP CEREBEL ART |
| ICD 10 | I63.39 | CEREB INFRC D/T THRMBO OTH CEREB ART |
| ICD 10 | I63.4 | CI D/T EMBOLISM OF CEREBRAL ARTERIE |
| ICD 10 | I63.40 | CEREB INFRC D/T EMBLSM UNSP CEREB ART |
| ICD 10 | I63.41 | CI D/T EMBLSM OF MID CEREBRL ARTERY |
| ICD 10 | I63.411 | CEREB INFRC D/T EMBLSM R MID CEREB ART |
| ICD 10 | I63.412 | CEREB INFRC D/T EMBLSM L MID CEREB ART |
| ICD 10 | I63.413 | CI D/T EMBOL BIL MIDDL CEREBL ARTRY |
| ICD 10 | I63.419 | CI D/T EMBLSM OF UNSP MID CRBRL ARTR |
| ICD 10 | I63.42 | CI D/T EMBLSM OF ANTERI CRBRL ARTRY |
| ICD 10 | I63.421 | CEREB INFRC D/T EMBLSM R ANT CEREB ART |
| ICD 10 | I63.422 | CEREB INFRC D/T EMBLSM L ANT CEREB ART |
| ICD 10 | I63.423 | CI D/T EMBOL BIL ANTER CEREBL ARTRY |
| ICD 10 | I63.429 | CI D/T EMBLSM OF UNSP ANT CRBRL ARTR |
| ICD 10 | I63.43 | CI D/T EMBLSM OF POSTERI CRBRL ARTR |
| ICD 10 | I63.431 | CEREB INFRC D/T EMBLSM R POSTR CEREB ART |
| ICD 10 | I63.432 | CEREB INFRC D/T EMBLSM L POSTR CEREB ART |
| ICD 10 | I63.433 | CI D/T EMBOL BI POSTER CEREBRL ARTY |
| ICD 10 | I63.439 | CI D/T EMBLSM UNSP POST CRBRL ARTR |
| ICD 10 | I63.44 | CI D/T EMBOLSM OF CEREBELLAR ARTERY |
| ICD 10 | I63.441 | CEREB INFRC D/T EMBLSM R CEREBEL ART |
| ICD 10 | I63.442 | CEREB INFRC D/T EMBLSM L CEREBEL ART |
| ICD 10 | I63.443 | CEREB INFRC D/T EMBLSM BILAT CEREBEL ART |
| ICD 10 | I63.449 | CEREB INFRC D/T EMBLSM UNSP CEREBEL ART |
| ICD 10 | I63.49 | CEREB INFRC D/T EMBLSM OTH CEREB ART |
| ICD 10 | I63.5 | CI D/T UNSP OCLSN OF CEREBRL ARTERY |
| ICD 10 | I63.50 | CI D/T UNSP OCLSN,UNSP CEREBRL ARTERY |
| ICD 10 | I63.51 | CI D/T UNSP OCLSN,MID CEREBRL ARTERY |
| ICD 10 | I63.511 | CI D/T UNSP OCLSN, R CEREBRL ARTERY |
| ICD 10 | I63.512 | CI D/T UNSP OCLSN, L CEREBRL ARTERY |
| ICD 10 | I63.513 | CI D/T UNSP OCL/STEN BIL MID CER ART |
| ICD 10 | I63.519 | CI D/T UNSP OCLSN,UNSP MID CERBRL ART |
| ICD 10 | I63.52 | CI D/T UNSP OCLSN,ANTERIO CERBRL ART |
| ICD 10 | I63.521 | CI D/T UNSP OCLSN R ANTER CRBRL ART |
| ICD 10 | I63.522 | CI D/T UNSP OCLSN L ANTER CRBRL ART |
| ICD 10 | I63.523 | CI D/T UNSP OCL/STEN BIL ANT CER ART |
| ICD 10 | I63.529 | CI D/T UNSP OCLSN,UNSP ANTE CRBRL ART |
| ICD 10 | I63.53 | CI D/T UNSP OCLSN POST CEREBRL ARTE |
| ICD 10 | I63.531 | CI D/T UNSP OCLSN R POSTE CRBRL ART |
| ICD 10 | I63.532 | CI D/T UNSP OCLSN L POST CERBRL ART |
| ICD 10 | I63.533 | CI D/T UNSP OCCL/STEN BI POST CER ART |
| ICD 10 | I63.539 | CI D/T UNSP OCLSN UNSP POST CRBRL ART |
| ICD 10 | I63.54 | CI D/T UNSP OCLSN OF CEREBELLAR ARTR |
| ICD 10 | I63.541 | CI D/T UNSP OCLSN R CEREBELLR ARTRY |
| ICD 10 | I63.542 | CI D/T UNSP OCLSN L CEREBELLR ARTRY |
| ICD 10 | I63.543 | CI D/T UNSP OCCL/STEN BI CERBR ARTY |
| ICD 10 | I63.549 | CI D/T UNSP OCLSN,UNSP CEREBELLR ARTE |
| ICD 10 | I63.59 | CI D/T UNSP OCLSN,OTH CEREBRAL ARTER |
| ICD 10 | I63.6 | CI D/T CERBRL VENOUS THRMB,NONPYOGN |
| ICD 10 | I63.8 | OTH CEREBRAL INFARCTION |
| ICD 10 | I63.81 | OTH CEREB INFRC D/T OCCLS OR STEN SM ART |
| ICD 10 | I63.89 | OTH CEREB INFRC |
| ICD 10 | I63.9 | CEREB INFRC UNSP |
| ICD 10 | I65 | OCLSN OF PRECEREBRL ARTERIES,NOT CI |
| ICD 10 | I65.0 | OCCLUSION&STENOSIS OF VERTBRL ARTRY |
| ICD 10 | I65.01 | OCCLS&STEN R VERT ART |
| ICD 10 | I65.02 | OCCLS&STEN L VERT ART |
| ICD 10 | I65.03 | OCCLS&STEN BILAT VERT ART |
| ICD 10 | I65.09 | OCCLS&STEN UNSP VERT ART |
| ICD 10 | I65.1 | OCCLS&STEN BASILAR ART |
| ICD 10 | I65.2 | OCCLUSION&STENOSIS OF CAROTID ARTRY |
| ICD 10 | I65.21 | OCCLS&STEN R CRTD ART |
| ICD 10 | I65.22 | OCCLS&STEN L CRTD ART |
| ICD 10 | I65.23 | OCCLS&STEN BILAT CRTD ART |
| ICD 10 | I65.29 | OCCLS&STEN UNSP CRTD ART |
| ICD 10 | I65.8 | OCCLS&STEN OTH PROCECEREB ART |
| ICD 10 | I65.9 | OCCLS&STEN UNSP PRECEREB ART |
| ICD 10 | I66 | OCCLUSION CEREBRAL ARTERIES,NOT CI |
| ICD 10 | I66.0 | OCCLUSION MID CEREBRAL ARTERY |
| ICD 10 | I66.01 | OCCLS&STEN R MID CEREB ART |
| ICD 10 | I66.02 | OCCLS&STEN L MID CEREB ART |
| ICD 10 | I66.03 | OCCLS&STEN BILAT MID CEREB ART |
| ICD 10 | I66.09 | OCCLS&STEN UNSP MID CEREB ART |
| ICD 10 | I66.1 | OCCLUSION ANTERIOR CEREBRAL ARTERY |
| ICD 10 | I66.11 | OCCLS&STEN R ANT CEREB ART |
| ICD 10 | I66.12 | OCCLS&STEN L ANT CEREB ART |
| ICD 10 | I66.13 | OCCLS&STEN BILAT ANT CEREB ART |
| ICD 10 | I66.19 | OCCLS&STEN UNSP ANT CEREB ART |
| ICD 10 | I66.2 | OCCLUSION POSTERIOR CEREBRAL ARTERY |
| ICD 10 | I66.21 | OCCLS&STEN R POSTR CEREB ART |
| ICD 10 | I66.22 | OCCLS&STEN L POSTR CEREB ART |
| ICD 10 | I66.23 | OCCLS&STEN BILAT POSTR CEREB ART |
| ICD 10 | I66.29 | OCCLS&STEN UNSP POSTR CEREB ART |
| ICD 10 | I66.3 | OCCLS&STEN CEREBEL ART |
| ICD 10 | I66.8 | OCCLS&STEN OTH CEREB ART |
| ICD 10 | I66.9 | OCCLS&STEN UNSP CEREB ART |
| ICD 10 | I67 | OTH CEREBROVASCULAR DISEASES |
| ICD 10 | I67.0 | DISSECTION CEREB ART NORUPT |
| ICD 10 | I67.1 | CEREB ANEURYSM NORUPT |
| ICD 10 | I67.2 | CEREB ATHSCL |
| ICD 10 | I67.3 | PROGRSV VASC LEUKENCEP |
| ICD 10 | I67.4 | HTN ENCEPHALOPATHY |
| ICD 10 | I67.5 | MOYAMOYA DZ |
| ICD 10 | I67.6 | NONPYOGENIC THRMBO INTRCRN VENOUS SYS |
| ICD 10 | I67.7 | CEREB ARTERITIS NEC |
| ICD 10 | I67.8 | OTH SPECIFD CEREBROVASCULAR DZ |
| ICD 10 | I67.81 | AC CEREBVASC INSUFF |
| ICD 10 | I67.82 | CEREB ISCHEMIA |
| ICD 10 | I67.83 | POSTR REVERSIBLE ENCEPHALOPATHY SYND |
| ICD 10 | I67.84 | CEREBRAL VASOSPASM AND VASOCONSTRIC |
| ICD 10 | I67.841 | REVERSIBLE CEREBVASC VASOCONSTRI SYND |
| ICD 10 | I67.848 | OTH CEREBVASC VASOSPASM&VASOCONSTRI |
| ICD 10 | I67.850 | CEREBL AUTO DOMNT ARTERPTHY SUB INF |
| ICD 10 | I67.858 | OTH HEREDIT CEREBVASC DZ |
| ICD 10 | I67.89 | OTH CEREBVASC DZ |
| ICD 10 | I67.9 | CEREBVASC DZ UNSP |
| ICD 10 | I68 | CEREBROVASCULAR DISORDERS IN DZS CE |
| ICD 10 | I68.0 | CEREB AMYLOID ANGIOPATHY |
| ICD 10 | I68.2 | CEREB ARTERITIS IN OTH DZ CLS ELSWHR |
| ICD 10 | I68.8 | OTH CEREBVASC DISORD IN DZ CLS ELSWHR |
| ICD 10 | I69 | SEQE OF CEREBROVASCULAR DISEASE |
| ICD 10 | I69.0 | SEQE OF NTSAH |
| ICD 10 | I69.00 | UNSP SEQE NONTRM SUBARC HEMRG |
| ICD 10 | I69.01 | COGNITIVE DEFICITS FOLLOWING NTSAH |
| ICD 10 | I69.010 | ATTN/CONCENT DEFICT FOL SUBA HEMORR |
| ICD 10 | I69.011 | MEMORY DEFIC FOL NONTRM SUBARC HEMRG |
| ICD 10 | I69.012 | VIS DEF/SPTL FOL NTRM SUBARAC HEMOR |
| ICD 10 | I69.013 | PSYCOOMTR DEFIC FOL NONTRM SUBARC HEMRG |
| ICD 10 | I69.014 | FRNTL LOB EXC FNC DEFCT NTM SUB HEM |
| ICD 10 | I69.015 | COGNT SCL EMTL DFCT FL NTRM SUB HEM |
| ICD 10 | I69.018 | OTH SYS SGNS INV CG FUN NTM SUB HEM |
| ICD 10 | I69.019 | UNSP SYS SGNS INV CG FUN NTM SUB HEM |
| ICD 10 | I69.02 | SPEECH&LANGU DEFICITS FOLLWNG NTSAH |
| ICD 10 | I69.020 | APHASIA FOL NONTRM SUBARC HEMRG |
| ICD 10 | I69.021 | DYSPHASIA FOL NONTRM SUBARC HEMRG |
| ICD 10 | I69.022 | DYSARTHRIA FOL NONTRM SUBARC HEMRG |
| ICD 10 | I69.023 | FLUENCY DISORD FOL NONTRM SUBARC HEMRG |
| ICD 10 | I69.028 | OTH SPEECH&LANG DEFICTS FLWNG NTSAH |
| ICD 10 | I69.03 | MONOPLEGIA OF UPPER LIMB FOLL NTSAH |
| ICD 10 | I69.031 | MONOPLEGA,UL FG NTSAH AFF R DOM SD |
| ICD 10 | I69.032 | MONOPLEGA,UL FG NTSAH AFF L DOM SD |
| ICD 10 | I69.033 | MONOPLEGA,UL FG NTSAH AFF R NON-DM |
| ICD 10 | I69.034 | MONOPLEGA,UL FG NTSAH AFF L NON-DM |
| ICD 10 | I69.039 | MONOPLEGA,UL FG NTSAH AFF UNSP SIDE |
| ICD 10 | I69.04 | MONOPLEGIA OF LOWER LIMB FG NTSAH |
| ICD 10 | I69.041 | MONOPLEGA,LL FG NTSAH AFF R DOM SD |
| ICD 10 | I69.042 | MONOPLEGA,LL FG NTSAH AFF L DOM SD |
| ICD 10 | I69.043 | MONOPLEGA,LL FG NTSAH AFF R NON-DM |
| ICD 10 | I69.044 | MONOPLEGA,LL FG NTSAH AFF L NON-DM |
| ICD 10 | I69.049 | MONOPLEGA,LL FG NTSAH AFF UNSP SIDE |
| ICD 10 | I69.05 | HEMIPLEGIA AND HEMIPARESIS FG NTSAH |
| ICD 10 | I69.051 | HMPLEGIA&HMPAR FG NTSAH AFF R DOMN |
| ICD 10 | I69.052 | HMPLEGIA&HMPAR FG NTSAH AFF L DOM |
| ICD 10 | I69.053 | HMPLGA&HMPRS FG NTSAH AFF R NONDOM |
| ICD 10 | I69.054 | HMPLGA&HMPRS FG NTSAH AFF L NONDOM |
| ICD 10 | I69.059 | HMPLGA&HMPRSIS FG NTSAH AFF UNSP SDE |
| ICD 10 | I69.06 | OTH PARALYTIC SYND FG NTSAH |
| ICD 10 | I69.061 | OTH PARALYTC SYN FG NTSAH AFF R DO |
| ICD 10 | I69.062 | OTH PARALYTC SYN FG NTSAH AFF L DO |
| ICD 10 | I69.063 | OTH PARALYT SYN FG NTSAH AFF R NON |
| ICD 10 | I69.064 | OTH PARALYT SYN FG NTSAH AFF L NON |
| ICD 10 | I69.065 | OTH PARALYTC SYN FG NTSAH,BILAT |
| ICD 10 | I69.069 | OTH PARALTC SYN FG NTSAH AFF UNSP SD |
| ICD 10 | I69.09 | OTH SEQE OF NTSAH |
| ICD 10 | I69.090 | APRAXIA FOL NONTRM SUBARC HEMRG |
| ICD 10 | I69.091 | DYSPHAGIA FOL NONTRM SUBARC HEMRG |
| ICD 10 | I69.092 | FAC WEAKNESS FOL NONTRM SUBARC HEMRG |
| ICD 10 | I69.093 | ATAXIA FOL NONTRM SUBARC HEMRG |
| ICD 10 | I69.098 | OTH SEQE FOL NONTRM SUBARC HEMRG |
| ICD 10 | I69.1 | SEQE OF NTICH |
| ICD 10 | I69.10 | UNSP SEQE NONTRM INTRCEREB HEMRG |
| ICD 10 | I69.11 | COGNITIVE DEFICITS FOLLOWING NTICH |
| ICD 10 | I69.110 | ATTN/CONCN DEFT FOL NTRM CERB HEMO |
| ICD 10 | I69.111 | MEMORY DEFIC FOL NONTRM INTRCEREB HEMRG |
| ICD 10 | I69.112 | VISO DEFT NEG FOL NTRM INTCRB HEMO |
| ICD 10 | I69.113 | PSYCOMTR DEFT FOL NTRM INTCERB HEM |
| ICD 10 | I69.114 | FNTL LB EXC FCN FOL NTR INTCERB HEM |
| ICD 10 | I69.115 | COG SOC EMO DEF FOL NTR INTCERB HEM |
| ICD 10 | I69.118 | OTH SYM SGN COG FOL NTR INTCE HEM |
| ICD 10 | I69.119 | UNSP SYM SGN COG FOL NTR INTCE HEM |
| ICD 10 | I69.12 | SPEECH&LANGU DEFICITS FOLLWNG NTICH |
| ICD 10 | I69.120 | APHASIA FOL NONTRM INTRCEREB HEMRG |
| ICD 10 | I69.121 | DYSPHASIA FOL NONTRM INTRCEREB HEMRG |
| ICD 10 | I69.122 | DYSARTHRIA FOL NONTRM INTRCEREB HEMRG |
| ICD 10 | I69.123 | FLUENCY DISORDER FOLLOWING NTICH |
| ICD 10 | I69.128 | OTH SPEECH&LANG DEFICTS FLWNG NTICH |
| ICD 10 | I69.13 | MONOPLG UPLMB FOL NONTRM INTRCEREB HEMRG |
| ICD 10 | I69.131 | MONOPLG UP LMB INTRCEREB HEMRG AFF R DOM |
| ICD 10 | I69.132 | MONOPLG UP LMB INTRCEREB HEMRG AFF L DOM |
| ICD 10 | I69.133 | MONOPLG UP LMB INTRCEREB HEMRG R NONDOM |
| ICD 10 | I69.134 | MONOPLG UP LMB INTRCEREB HEMRG L NONDOM |
| ICD 10 | I69.139 | MONOPLG UP LMB INTRCEREB HEMRG AFF UNSP |
| ICD 10 | I69.14 | MONOPLG LO LMB NONTRM INTRCEREB HEMRG |
| ICD 10 | I69.141 | MONOPLG LO LMB INTRCEREB HEMRG AFF R DOM |
| ICD 10 | I69.142 | MONOPLG LO LMB INTRCEREB HEMRG AFF L DOM |
| ICD 10 | I69.143 | MONOPLG LO LMB INTRCEREB HEMRG R NONDOM |
| ICD 10 | I69.144 | MONOPLG LO LMB INTRCEREB HEMRG L NONDOM |
| ICD 10 | I69.149 | MONOPLG LO LMB INTRCEREB HEMRG AFF UNSP |
| ICD 10 | I69.15 | HEMPLEG&HEMPAR NONTRM INTRCEREB HEMRG |
| ICD 10 | I69.151 | HEMPLEG&HEMPAR INTRCEREB HEMRG AFF R DOM |
| ICD 10 | I69.152 | HEMPLEG&HEMPAR INTRCEREB HEMRG AFF L DOM |
| ICD 10 | I69.153 | HEMPLEG&HEMPAR INTRCEREB HEMRG R NONDOM |
| ICD 10 | I69.154 | HEMPLEG&HEMPAR INTRCEREB HEMRG L NONDOM |
| ICD 10 | I69.159 | HEMPLEG&HEMPAR INTRCEREB HEMRG AFF UNSP |
| ICD 10 | I69.16 | OTH PARLYT SYND NONTRM INTRCEREB HEMRG |
| ICD 10 | I69.161 | OTH PARLYT SYND INTRCEREB HEMRG R DOM |
| ICD 10 | I69.162 | OTH PARLYT SYND INTRCEREB HEMRG L DOM |
| ICD 10 | I69.163 | OTH PARLYT SYND INTRCEREB HEMRG R NONDOM |
| ICD 10 | I69.164 | OTH PARLYT SYND INTRCEREB HEMRG L NONDOM |
| ICD 10 | I69.165 | OTH PARLYT SYND INTRCEREB HEMRG,BILAT |
| ICD 10 | I69.169 | OTH PARLYT SYND INTRCEREB HEMRG AFF UNSP |
| ICD 10 | I69.19 | OTH SEQ OF NONTRM INTRCEREB HEMRG |
| ICD 10 | I69.190 | APRAXIA FOL NONTRM INTRCEREB HEMRG |
| ICD 10 | I69.191 | DYSPHAGIA FOL NONTRM INTRCEREB HEMRG |
| ICD 10 | I69.192 | FAC WEAKNESS FOL NONTRM INTRCEREB HEMRG |
| ICD 10 | I69.193 | ATAXIA FOL NONTRM INTRCEREB HEMRG |
| ICD 10 | I69.198 | OTH SEQ NONTRM INTRCEREB HEMRG |
| ICD 10 | I69.2 | SEQ OF OTH NONTRM INTRCRN HEMRG |
| ICD 10 | I69.20 | UNSP SEQ OTH NONTRM INTRCRN HEMRG |
| ICD 10 | I69.21 | COGN DEFIC FOL OTH NONTRM INTRCRN HEMRG |
| ICD 10 | I69.210 | ATTN/CONCNT DEFIC NONTRM INTRCRN HEMRG |
| ICD 10 | I69.211 | MEMO DEFIC FOL OTH NONTRM INTRCRN HEMRG |
| ICD 10 | I69.212 | VISU DEFIC NEGL OTH NONTRM INTRCRN HEMRG |
| ICD 10 | I69.213 | PSYCHOMTR DEFIC OTH NONTRM INTRCRN HEMRG |
| ICD 10 | I69.214 | FRNTL LOB FUNCT DEFIC FOL INTRCRN HEMRG |
| ICD 10 | I69.215 | COGN SOCIAL EMO DEFIC FOL INTRCRN HEMRG |
| ICD 10 | I69.218 | OTH SYMP SIGN COGN FOL INTRCRN HEMRG |
| ICD 10 | I69.219 | UNSP SYM SGN COGN FOL INTRCRN HEMRG |
| ICD 10 | I69.22 | SPCH&LNG DEFIC FOL NONTRM INTRCRN HEMRG |
| ICD 10 | I69.220 | APHASIA FOL OTH NONTRM INTRCRN HEMRG |
| ICD 10 | I69.221 | DYSPHASIA FOL OTH NONTRM INTRCRN HEMRG |
| ICD 10 | I69.222 | DYSARTHRIA FOL OTH NONTRM INTRCRN HEMRG |
| ICD 10 | I69.223 | FLUENCY DISORD FOL NONTRM INTRCRN HEMRG |
| ICD 10 | I69.228 | OTH SPCH&LNG DEFIC NONTRM INTRCRN HEMRG |
| ICD 10 | I69.23 | MONOPLG UP LMB FOL NONTRM INTRCRN HEMRG |
| ICD 10 | I69.231 | MONOPLG UP LMB INTRCRN HEMRG AFF R DOM |
| ICD 10 | I69.232 | MONOPLG UP LMB INTRCRN HEMRG AFF L DOM |
| ICD 10 | I69.233 | MONOPLG UPLMB INTRCRN HEMRG AFF R NONDOM |
| ICD 10 | I69.234 | MONOPLG UPLMB INTRCRN HEMRG AFF L NONDOM |
| ICD 10 | I69.239 | MONOPLG UP LMB INTRCRN HEMRG AFF UNSP |
| ICD 10 | I69.24 | MONOPLG LO LMB FOL NONTRM INTRCRN HEMRG |
| ICD 10 | I69.241 | MONOPLG LO LMB INTRCRN HEMRG AFF R DOM |
| ICD 10 | I69.242 | MONOPLG LO LMB INTRCRN HEMRG AFF L DOM |
| ICD 10 | I69.243 | MONOPLG LOLMB INTRCRN HEMRG AFF R NONDOM |
| ICD 10 | I69.244 | MONOPLG LOLMB INTRCRN HEMRG AFF L NONDOM |
| ICD 10 | I69.249 | MONOPLG LO LMB INTRCRN HEMRG UNSP SIDE |
| ICD 10 | I69.25 | HEMPLEG&HEMPAR FOL NONTRM INTRCRN HEMRG |
| ICD 10 | I69.251 | HEMPLEG&HEMPAR INTRCRN HEMRG AFF R DOM |
| ICD 10 | I69.252 | HEMPLEG&HEMPAR INTRCRN HEMRG AFF L DOM |
| ICD 10 | I69.253 | HEMPLEG&HEMPAR INTRCRN HEMRG R NONDOM |
| ICD 10 | I69.254 | HEMPLEG&HEMPAR INTRCRN HEMRG L NONDOM |
| ICD 10 | I69.259 | HEMPLEG&HEMPAR INTRCRN HEMRG UNSP SIDE |
| ICD 10 | I69.26 | OTH PARLYT SYND NONTRM INTRCRN HEMRG |
| ICD 10 | I69.261 | OTH PARLYT SYND INTRCRN HEMRG R DOM |
| ICD 10 | I69.262 | OTH PARLYT SYND INTRCRAN HEMRG L DOM |
| ICD 10 | I69.263 | OTH PARLYT SYND INTRCRAN HEMRG R NONDOM |
| ICD 10 | I69.264 | OTH PARLYT SYND INTRCRAN HEMRG L NONDOM |
| ICD 10 | I69.265 | OTH PARLYT SYND INTRCRAN HEMRG,BILAT |
| ICD 10 | I69.269 | OTH PARLYT SYND INTRCRAN HEMRG AFF UNSP |
| ICD 10 | I69.29 | OTH SEQ OF NONTRM INTRCRAN HEMRG |
| ICD 10 | I69.290 | APRAXIA FOL NONTRM INTRCRAN HEMRG |
| ICD 10 | I69.291 | DYSPHAGIA FOL NONTRM INTRCRAN HEMRG |
| ICD 10 | I69.292 | FAC WEAKNESS FOL NONTRM INTRCRAN HEMRG |
| ICD 10 | I69.293 | ATAXIA FOL NONTRM INTRCRAN HEMRG |
| ICD 10 | I69.298 | OTH SEQ NONTRM INTRCRAN HEMRG |
| ICD 10 | I69.3 | SEQ OF CEREBRAL INFARCTION |
| ICD 10 | I69.30 | UNSP SEQ CEREB INFRC |
| ICD 10 | I69.31 | COGNITIVE DEFICITS FOLLOWING CEREB INFRC |
| ICD 10 | I69.310 | ATTN/CONCEN DEFT FOL CEREB INFARCT |
| ICD 10 | I69.311 | MEMORY DEFIC FOL CEREB INFRC |
| ICD 10 | I69.312 | VISU DEFIC NEGL FOL CEREB INFRC |
| ICD 10 | I69.313 | PSYCHOMTR DEFIC FOL CEREB INFRC |
| ICD 10 | I69.314 | FRNTL LOB FUNCT DEFCT FOL CEREB INFRC |
| ICD 10 | I69.315 | COGN SOCIAL OR EMO DEFIC FOL CEREB INFRC |
| ICD 10 | I69.318 | OTH SYMP SIGN COG FUNCT FOL CEREB INFRC |
| ICD 10 | I69.319 | UNSP SYMP SIGN COG FUNCT FOL CEREB INFRC |
| ICD 10 | I69.32 | SPEECH&LANGUAGE DEFICITS FG CEREB INFRC |
| ICD 10 | I69.320 | APHASIA FOL CEREB INFRC |
| ICD 10 | I69.321 | DYSPHASIA FOL CEREB INFRC |
| ICD 10 | I69.322 | DYSARTHRIA FOL CEREB INFRC |
| ICD 10 | I69.323 | FLUENCY DISORD FOL CEREB INFRC |
| ICD 10 | I69.328 | OTH SPEECH&LNG DEFICS FOL CEREB INFRC |
| ICD 10 | I69.33 | MONOPLEGIA OF UL FOLLOWING CEREB INFRC |
| ICD 10 | I69.331 | MONOPLG UP LMB FOL CEREB INFRC AFF R DOM |
| ICD 10 | I69.332 | MONOPLG UP LMB FOL CEREB INFRC AFF L DOM |
| ICD 10 | I69.333 | MONOPLG UP LMB FOL CEREB INFRC R NONDOM |
| ICD 10 | I69.334 | MONOPLG UP LMB FOL CEREB INFRC L NONDOM |
| ICD 10 | I69.339 | MONOPLG UP LMB FOL CEREB INFRC UNSP SIDE |
| ICD 10 | I69.34 | MONOPLG LO LMB FOLLOWING CEREB INFRC |
| ICD 10 | I69.341 | MONOPLG LO LMB FOL CEREB INFRC AFF R DOM |
| ICD 10 | I69.342 | MONOPLG LO LMB FOL CEREB INFRC AFF L DOM |
| ICD 10 | I69.343 | MONOPLG LO LMB FOL CEREB INFRC R NONDOM |
| ICD 10 | I69.344 | MONOPLG LO LMB FOL CEREB INFRC L NONDOM |
| ICD 10 | I69.349 | MONOPLG LO LMB FOL CEREB INFRC UNSP SIDE |
| ICD 10 | I69.35 | HEMPLEG&HEMPAR FOLLOWING CEREB INFRC |
| ICD 10 | I69.351 | HEMPLEG&HEMPAR FOL CEREB INFRC AFF R DOM |
| ICD 10 | I69.352 | HEMPLEG&HEMPAR FOL CEREB INFRC AFF L DOM |
| ICD 10 | I69.353 | HEMPLEG&HEMPAR FOL CEREB INFRC R NONDOM |
| ICD 10 | I69.354 | HEMPLEG&HEMPAR FOL CEREB INFRC L NONDOM |
| ICD 10 | I69.359 | HEMPLEG&HEMPAR FOL CEREB INFRC UNSP SIDE |
| ICD 10 | I69.36 | OTH PARALYTIC SYND FOLLOWING CEREB INFRC |
| ICD 10 | I69.361 | OTH PARLYT SYND CEREB INFRC AFF R DOM |
| ICD 10 | I69.362 | OTH PARLYT SYND CEREB INFRC AFF L DOM |
| ICD 10 | I69.363 | OTH PARLYT SYND CEREB INFRC AFF R NONDOM |
| ICD 10 | I69.364 | OTH PARLYT SYND CEREB INFRC AFF L NONDOM |
| ICD 10 | I69.365 | OTH PARLYT SYND CEREB INFRC BILAT |
| ICD 10 | I69.369 | OTH PARLYT SYND CEREB INFRC,UNSP SIDE |
| ICD 10 | I69.39 | OTH SEQ OF CEREBRAL INFARCTION |
| ICD 10 | I69.390 | APRAXIA FOL CEREB INFRC |
| ICD 10 | I69.391 | DYSPHAGIA FOL CEREB INFRC |
| ICD 10 | I69.392 | FAC WEAKNESS FOL CEREB INFRC |
| ICD 10 | I69.393 | ATAXIA FOL CEREB INFRC |
| ICD 10 | I69.398 | OTH SEQ CEREB INFRC |
| ICD 10 | I69.8 | SEQ OF OTH CEREBROVASCULAR DZ |
| ICD 10 | I69.80 | UNSP SEQ OTH CEREBVASC DZ |
| ICD 10 | I69.81 | COGNTV DEFIC FOL OTH CEREBVASC DZ |
| ICD 10 | I69.810 | ATTN/CONCEN DEFT FOL OTH CEREBVASC DZ |
| ICD 10 | I69.811 | MEMORY DEFIC FOL OTH CEREBVASC DZ |
| ICD 10 | I69.812 | VISU DEFIC NEGL FOL OTH CEREBVASC DZ |
| ICD 10 | I69.813 | PSYCHOMTR DEFIC FOL OTH CEREBVASC DZ |
| ICD 10 | I69.814 | FRNTL LOB EXE DEFCT FL OTH CEREBVASC DZ |
| ICD 10 | I69.815 | COGN SOCIAL EMO DEF FOL OTH CEREBVASC DZ |
| ICD 10 | I69.818 | OTH SYM SGN COG FOL OTH CEREBVASC DZ |
| ICD 10 | I69.819 | UNSP SYM SGNS COG FOL OTH CEREBVASC DZ |
| ICD 10 | I69.82 | SPEECH LANGUAGE DEFICITS CEREBVASC DZ |
| ICD 10 | I69.820 | APHASIA FOL OTH CEREBVASC DZ |
| ICD 10 | I69.821 | DYSPHASIA FOL OTH CEREBVASC DZ |
| ICD 10 | I69.822 | DYSARTHRIA FOL OTH CEREBVASC DZ |
| ICD 10 | I69.823 | FLUENCY DISORD FOL OTH CEREBVASC DZ |
| ICD 10 | I69.828 | OTH SPCH&LNG DEFIC FOL CEREBVASC DZ |
| ICD 10 | I69.83 | MONOPLEGIA UP LMB FOLLOWING CEREBVASC DZ |
| ICD 10 | I69.831 | MONPLG UP LMB FOL OTH CEREBVASC DZ R DOM |
| ICD 10 | I69.832 | MONPLG UP LMB FOL OTH CEREBVASC DZ L DOM |
| ICD 10 | I69.833 | MONPLG UP LMB OTH CEREBVASC DZ R NONDOM |
| ICD 10 | I69.834 | MONPLG UP LMB OTH CEREBVASC DZ L NONDOM |
| ICD 10 | I69.839 | MONPLG UP LMB FOL OTH CEREBVASC DZ UNSP |
| ICD 10 | I69.84 | MONOPLEGIA LO LMB FOL OTH CEREBVASC DZ |
| ICD 10 | I69.841 | MONPLG LO LMB FOL OTH CEREBVASC DZ R DOM |
| ICD 10 | I69.842 | MONPLG LO LMB FOL OTH CEREBVASC DZ L DOM |
| ICD 10 | I69.843 | MONPLG LO LMB OTH CEREBVASC DZ R NONDOM |
| ICD 10 | I69.844 | MONPLG LO LMB OTH CEREBVASC DZ L NONDOM |
| ICD 10 | I69.849 | MONPLG LO LMB FOL OTH CEREBVASC DZ UNSP |
| ICD 10 | I69.85 | HEMPLEG&HEMPAR FOL OTH CEREBVASC DZ |
| ICD 10 | I69.851 | HEMPLEG&HEMPAR OTH CEREBVASC DZ R DOM |
| ICD 10 | I69.852 | HEMPLEG&HEMPAR OTH CEREBVASC DZ L DOM |
| ICD 10 | I69.853 | HEMPLEG&HEMPAR OTH CEREBVASC DZ R NONDOM |
| ICD 10 | I69.854 | HEMPLEG&HEMPAR OTH CEREBVASC DZ L NONDOM |
| ICD 10 | I69.859 | HEMPLEG&HEMPAR OTH CEREBVASC DZ AFF UNSP |
| ICD 10 | I69.86 | OTH PARALYTIC SYND FOL OTH CEREBVASC DZ |
| ICD 10 | I69.861 | OTH PARLYT SYND OTH CEREBVASC DZ R DOM |
| ICD 10 | I69.862 | OTH PARLYT SYND OTH CEREBVASC DZ L DOM |
| ICD 10 | I69.863 | OTH PARLYT SYND OTH CEREBVASC R NONDOM |
| ICD 10 | I69.864 | OTH PARLYT SYND OTH CEREBVASC L NONDOM |
| ICD 10 | I69.865 | OTH PARLYT SYND OTH CEREBVASC BILAT |
| ICD 10 | I69.869 | OTH PARLYT SYND OTH CEREBVASC DZ UNS |
| ICD 10 | I69.89 | OTH SEQ OF OTH CEREBVASC DZ |
| ICD 10 | I69.890 | APRAXIA FOL OTH CEREBVASC DZ |
| ICD 10 | I69.891 | DYSPHAGIA FOL OTH CEREBVASC DZ |
| ICD 10 | I69.892 | FAC WEAKNESS FOL OTH CEREBVASC DZ |
| ICD 10 | I69.893 | ATAXIA FOL OTH CEREBVASC DZ |
| ICD 10 | I69.898 | OTH SEQ OTH CEREBVASC DZ |
| ICD 10 | I69.9 | SEQ OF UNSP CEREBROVASCULAR DZ |
| ICD 10 | I69.90 | UNSP SEQ UNSP CEREBVASC DZ |
| ICD 10 | I69.91 | COGNITIVE DEFIC FOL UNSP CEREBVASC DZ |
| ICD 10 | I69.910 | ATTN/CONCEN DEFT FOL UNSP CEREBVASC DZ |
| ICD 10 | I69.911 | MEMORY DEFIC FOL UNSP CEREBVASC DZ |
| ICD 10 | I69.912 | VISU DEFIC NEGL FOL UNSP CEREBVASC DZ |
| ICD 10 | I69.913 | PSYCHOMTR DEFIC FOL UNSP CEREBVASC DZ |
| ICD 10 | I69.914 | FRNTL LOB DEFIC FOL UNSP CEREBVASC DZ |
| ICD 10 | I69.915 | COGN SOCIAL DEFIC FOL UNSP CEREBVASC DZ |
| ICD 10 | I69.918 | OTH SYM SGN COG FOL UNSP CEREBVASC DZ |
| ICD 10 | I69.919 | UNSP SYM SGNS COG FOL UNSP CEREBVASC DZ |
| ICD 10 | I69.92 | SPEECH&LNG DEFIC FOL UNSP CEREBVASC DZ |
| ICD 10 | I69.920 | APHASIA FOL UNSP CEREBVASC DZ |
| ICD 10 | I69.921 | DYSPHASIA FOL UNSP CEREBVASC DZ |
| ICD 10 | I69.922 | DYSARTHRIA FOL UNSP CEREBVASC DZ |
| ICD 10 | I69.923 | FLUENCY DISORD FOL UNSP CEREBVASC DZ |
| ICD 10 | I69.928 | OTH SPCH&LNG DEFICTS UNSP CEREBVASC DZ |
| ICD 10 | I69.93 | MONOPLEGIA UP LMB FOL UNSP CEREBVASC DZ |
| ICD 10 | I69.931 | MONPLG UP LMB FOL CEREBVASC DZ R DOM |
| ICD 10 | I69.932 | MONPLG UP LMB FOL CEREBVASC DZ L DOM |
| ICD 10 | I69.933 | MONPLG UP LMB FOL CEREBVASC DZ R NONDOM |
| ICD 10 | I69.934 | MONPLG UP LMB FOL CEREBVASC DZ L NONDOM |
| ICD 10 | I69.939 | MONPLG UP LMB FOL UNSP CEREBVASC DZ UNSP |
| ICD 10 | I69.94 | MONOPLEGIA LO LMB FOL UNSP CEREBVASC DZ |
| ICD 10 | I69.941 | MONPLG LO LMB FOL CEREBVASC DZ R DOM |
| ICD 10 | I69.942 | MONPLG LO LMB FOL CEREBVASC DZ L DOM |
| ICD 10 | I69.943 | MONPLG LO LMB FOL CEREBVASC DZ R NONDOM |
| ICD 10 | I69.944 | MONPLG LO LMB FOL CEREBVASC DZ L NONDOM |
| ICD 10 | I69.949 | MONPLG LO LMB FOL UNSP CEREBVASC DZ UNSP |
| ICD 10 | I69.95 | HEMPLEG&HEMPAR FOL UNSP CEREBVASC DZ |
| ICD 10 | I69.951 | HEMPLEG&HEMPAR UNSP CEREBVASC DZ R DOM |
| ICD 10 | I69.952 | HEMPLEG&HEMPAR UNSP CEREBVASC DZ L DOM |
| ICD 10 | I69.953 | HEMPLEG&HEMPAR UNSP CEREBVASC R NONDOM |
| ICD 10 | I69.954 | HEMPLEG&HEMPAR UNSP CEREBVASC L NONDOM |
| ICD 10 | I69.959 | HEMPLEG&HEMPAR UNSP CEREBVASC AFF UNSP |
| ICD 10 | I69.96 | OTH PARALYTIC SYND FOL UNSP CEREBVASC DZ |
| ICD 10 | I69.961 | OTH PARLYT SYND UNSP CEREBVASC DZ R DOM |
| ICD 10 | I69.962 | OTH PARLYT SYND UNSP CEREBVASC DZ L DOM |
| ICD 10 | I69.963 | OTH PARLYT SYND UNSP CEREBVASC R NONDOM |
| ICD 10 | I69.964 | OTH PARLYT SYND UNSP CEREBVASC L NONDOM |
| ICD 10 | I69.965 | OTH PARLYT SYND UNSP CEREBVASC BILAT |
| ICD 10 | I69.969 | OTH PARLYT SYND UNSP CEREBVASC DZ UNS |
| ICD 10 | I69.99 | OTH SEQ OF UNSP CEREBVASC DZ |
| ICD 10 | I69.990 | APRAXIA FOL UNSP CEREBVASC DZ |
| ICD 10 | I69.991 | DYSPHAGIA FOL UNSP CEREBVASC DZ |
| ICD 10 | I69.992 | FAC WEAKNESS FOL UNSP CEREBVASC DZ |
| ICD 10 | I69.993 | ATAXIA FOL UNSP CEREBVASC DZ |
| ICD 10 | I69.998 | OTH SEQ FOL UNSP CEREBVASC DZ |
| ICD 10 | I70 | ATHEROSCLEROSIS |
| ICD 10 | I70.0 | ATHSCL AORT |
| ICD 10 | I70.1 | ATHSCL RENAL ART |
| ICD 10 | I70.2 | ATHSCL NATIVE ART EXTRM |
| ICD 10 | I70.20 | UNSP ATHSCL OF NTV ART OF EXTRMTIE |
| ICD 10 | I70.201 | UNSP ATHSCL NATIVE ART EXTRM R LEG |
| ICD 10 | I70.202 | UNSP ATHSCL NATIVE ART EXTRM L LEG |
| ICD 10 | I70.203 | UNSP ATHSCL,NTV ARTER,EXTRM,BIL LG |
| ICD 10 | I70.208 | UNSP ATHSCL NATIVE ART EXTRM OTH EXTRM |
| ICD 10 | I70.209 | UNSP ATHSCL,NTV ART,EXTRM,UNSP EXTR |
| ICD 10 | I70.21 | ATHSCL,NATIV ART OF EXTREM W IC |
| ICD 10 | I70.211 | ATHSCL,NATV ART,EXTRM W IC R LG |
| ICD 10 | I70.212 | ATHSCL,NATV ART,EXTREM W IC L LG |
| ICD 10 | I70.213 | ATHSCL,NTV ART,EXTRM W IC BIL LG |
| ICD 10 | I70.218 | ATHSCL,NTV ART,EXTRM W IC,OTH EXT |
| ICD 10 | I70.219 | ATHSCL,NTV ART,EXTRM W IC,UNSP EXT |
| ICD 10 | I70.22 | ATHSCL,NATIV ART,EXTREM W REST PN |
| ICD 10 | I70.221 | ATHSCL,NTV ART,EXTRM W RST PN R LG |
| ICD 10 | I70.222 | ATHSCL,NTV ART,EXTRM W RST PN L LG |
| ICD 10 | I70.223 | ATHSCL,NTV ART,EXTRM W RST PN,BIL |
| ICD 10 | I70.228 | ATHSCL,NTV ART,EXTRM W RST PN,OTH |
| ICD 10 | I70.229 | ATHSCL,NTV ART,EXTRM W RST PN,UNS |
| ICD 10 | I70.23 | ATHSCL,NTV ART R LG W ULCERATION |
| ICD 10 | I70.231 | ATHSCL NATIVE ART R LEG W ULC THI |
| ICD 10 | I70.232 | ATHSCL,NTV ART R LG W ULCER,CALF |
| ICD 10 | I70.233 | ATHSCL,NTV ART R LG W ULCER ANKLE |
| ICD 10 | I70.234 | ATHSCL,NTV ART R LG,W ULCR,HEEL FT |
| ICD 10 | I70.235 | ATHSCL,NTV ART R LG,ULCR,OTH PT FT |
| ICD 10 | I70.238 | ATHSCL NTV ART R LG ULC OTH LO LG |
| ICD 10 | I70.239 | ATHSCL NTV ART R LG ULC UNSP SITE |
| ICD 10 | I70.24 | ATHSCL NTV ART L LG W ULCERATION |
| ICD 10 | I70.241 | ATHSCL NATIVE ART L LEG W ULC THI |
| ICD 10 | I70.242 | ATHSCL NTV ARTER L LG W ULC CALF |
| ICD 10 | I70.243 | ATHSCL NTV ART L LG ULC ANKLE |
| ICD 10 | I70.244 | ATHSCL NTV ART L LG ULCERATION HEEL&FT |
| ICD 10 | I70.245 | ATHSCL NTV ART L LG W ULC PT FOOT |
| ICD 10 | I70.248 | ATHSCL NTV ART L LG ULC OTH LO LG |
| ICD 10 | I70.249 | ATHSCL NTV ART L LG ULC UNSP SITE |
| ICD 10 | I70.25 | ATHSCL NATIVE ART OTH EXTRM W ULC |
| ICD 10 | I70.26 | ATHSCL NTV ART EXTRM W GANGRENE |
| ICD 10 | I70.261 | ATHSCL NATIVE ART EXTRM W GANGR R LEG |
| ICD 10 | I70.262 | ATHSCL NATIVE ART EXTRM W GANGR L LEG |
| ICD 10 | I70.263 | ATHSCL NTV ART EXTRM W GANGR,BILAT |
| ICD 10 | I70.268 | ATHSCL NTV ART EXTRM,GANGRN,OTH EXTRM |
| ICD 10 | I70.269 | ATHSCL NTV ARTER W GANGRN,UNSP EXTRM |
| ICD 10 | I70.29 | OTH ATHSCL NATIVE ARTERIES EXTRM |
| ICD 10 | I70.291 | OTH ATHSCL NATIVE ART EXTRM R LEG |
| ICD 10 | I70.292 | OTH ATHSCL NATIVE ART EXTRM L LEG |
| ICD 10 | I70.293 | OTH ATHSCL NATIVE ART EXTRM BILAT LEGS |
| ICD 10 | I70.298 | OTH ATHSCL NATIVE ART EXTRM OTH EXTRM |
| ICD 10 | I70.299 | OTH ATHSCL NATIVE ART EXTRM UNSP EXTRM |
| ICD 10 | I70.3 | ATHSCL UNSP BYP GRFT EXTRM |
| ICD 10 | I70.30 | UNSP ATHSCL UNSP TYP BYP GRFT EXTRM |
| ICD 10 | I70.301 | UNSP ATHRSC UNS,BYP GRFT EXTRM R LG |
| ICD 10 | I70.302 | UNSP ATHRSC UNSP BYP GRFT EXTRM L LG |
| ICD 10 | I70.303 | UNSP ATHRSCL UNSP BYP GRFT EXTRM,BIL |
| ICD 10 | I70.308 | UNSP ATHRSCL UNSP BYP GRFT EXTRM,OTH |
| ICD 10 | I70.309 | UNSP ATHSCL UNSP BYP GRFT EXTRM,UNS |
| ICD 10 | I70.31 | ATHSCL UNSP BYP GRFT EXTRM INTMIT CLAD |
| ICD 10 | I70.311 | ATHSCL,UNSP,BYP GRFT,EXTRM W/IC,R LG |
| ICD 10 | I70.312 | ATHSCL,UNSP,BYP GRFT,EXTRM W/IC,L LG |
| ICD 10 | I70.313 | ATHSCL,UNSP,BYP GRFT,EXTRM W/IC,BIL |
| ICD 10 | I70.318 | ATHSCL,UNSP,BYP GRFT,EXTRM W/IC,OTH |
| ICD 10 | I70.319 | ATHSCL,UNSP,BYP GRFT,EXTRM W/IC,UNS |
| ICD 10 | I70.32 | ATHSCL,UNSP,BYP GRFT,EXTRM W/RST PN |
| ICD 10 | I70.321 | ATHSCL,UNSP,BYP,EXTRM W/RST PN,R LG |
| ICD 10 | I70.322 | ATHSCL,UNSP,BYP,EXTRM W/RST PN,L LG |
| ICD 10 | I70.323 | ATHSCL,UNSP,BYP,EXTRM W/RST PN,BIL |
| ICD 10 | I70.328 | ATHSCL,UNSP,BYP,EXTRM W/RST PN,OTH |
| ICD 10 | I70.329 | ATHSCL,UNSP,BYP,EXTRM W/RST PN,UNS |
| ICD 10 | I70.33 | ATHSCL,UNSP,BYP GRFT,R LG W/ULCERTN |
| ICD 10 | I70.331 | ATHSCL,UNSP,BYPS,RLG W/ULCER,THIGH |
| ICD 10 | I70.332 | ATHSCL,UNSP,BYP GFT,RLG W/ULC,CALF |
| ICD 10 | I70.333 | ATHSCL,UNSP,BYPS,RLG W/ULCER,ANKLE |
| ICD 10 | I70.334 | ATHSCL,UNSP,BYPS,RLG W/ULC,HL&FOOT |
| ICD 10 | I70.335 | ATHSCL,UNSP,BYPS,RLG W/ULCER,PT FT |
| ICD 10 | I70.338 | ATHSCL,UNSP,BYPS,RLG W/ULCER,LW LG |
| ICD 10 | I70.339 | ATHSCL,UNSP,BYPS,RLG W/ULC,UNSP STE |
| ICD 10 | I70.34 | ATHSCL,UNSP,BYP GRFT,LLG W/ULCERTN |
| ICD 10 | I70.341 | ATHSCL,UNSP,BYPS,L LG W/ULCER,THIGH |
| ICD 10 | I70.342 | ATHSCL,UNSP,BYPS,L LG W/ULCERT,CALF |
| ICD 10 | I70.343 | ATHSCL,UNSP,BYPS,L LG W/ULCER,ANKLE |
| ICD 10 | I70.344 | ATHSCL,UNSP,BYPS,L LG W/ULC,HL&FOOT |
| ICD 10 | I70.345 | ATHSCL,UNSP,BYP GRFT,L LG W/ULC,PT FT |
| ICD 10 | I70.348 | ATHSCL,UNSP,BYP GRFT,L LG W/ULC,LW LG |
| ICD 10 | I70.349 | ATHSCL,UNSP,BYP GRFT,L LG W/ULC,UNS |
| ICD 10 | I70.35 | ATHSCL,UNSP,BYP GRFT,OTH EXTR W/ULC |
| ICD 10 | I70.36 | ATHSCL,UNSP,BYP GRFT,OTH EXTR W/GNG |
| ICD 10 | I70.361 | ATHSCL,UNSP,BYP GFT,EXTR W/GNG RLG |
| ICD 10 | I70.362 | ATHSCL,UNSP,BYP GFT,EXTR W/GNG LLG |
| ICD 10 | I70.363 | ATHSCL,UNSP,BYP GFT,EXTR W/GNG BIL |
| ICD 10 | I70.368 | ATHSCL,UNSP,BYP GFT,EXTR W/GNG OTH |
| ICD 10 | I70.369 | ATHSCL,UNSP,BYP GFT,EXTR W/GNG UNS |
| ICD 10 | I70.39 | OTH ATHSCL,UNSP TYP,BYP GRFT,EXTRM |
| ICD 10 | I70.391 | OTH ATHSCL,UNS,BYP GRFT,EXTRM,RLG |
| ICD 10 | I70.392 | OTH ATHSCL,UNS,BYP GRFT,EXTRM,LLG |
| ICD 10 | I70.393 | OTH ATHSCL,UNS,BYP GRFT,EXTRM,BIL |
| ICD 10 | I70.398 | OTH ATHSCL,UNS,BYP GRFT,EXTRM,OTH |
| ICD 10 | I70.399 | OTH ATHSCL,UNS,BYP GRFT,EXTRM,UNS |
| ICD 10 | I70.4 | ATHSCL,AUTOL VEIN BYP GFT,EXTRM |
| ICD 10 | I70.40 | UNSP ATHSCL OF AUTOL VN GRFT EXTRM |
| ICD 10 | I70.401 | UNSP ATHSCL AUTOL VN GRFT,EXTRM,R LG |
| ICD 10 | I70.402 | UNSP ATHSCL AUTOL VN GRFT,EXTRM,L LG |
| ICD 10 | I70.403 | UNSP ATHSCL,AUTOL VN GRFT,EXTRM,BILAT |
| ICD 10 | I70.408 | UNSP ATHSCL,AUTOL VN GRFT,EXTRM,OTH |
| ICD 10 | I70.409 | UNSP ATHSCL,AUTOL VN GRFT,EXTRM,UNSP |
| ICD 10 | I70.41 | ATHSCL AUTOL VN GRFT,EXTRM INTMIT CLAD |
| ICD 10 | I70.411 | ATHSCL AUTOL VN GRFT,INTMIT CLAD,R LG |
| ICD 10 | I70.412 | ATHSCL AUTOL VN GRFT,INTMIT CLAD,L LG |
| ICD 10 | I70.413 | ATHSCL AUTOL VN BYP GRFT EXTRM BILAT |
| ICD 10 | I70.418 | ATHSCL AUTOL VN BYP GRFT EXTRM OTH |
| ICD 10 | I70.419 | ATHSCL AUTOL VN GRFT,EXTRM CLAD,UNSP |
| ICD 10 | I70.42 | ATHSCL AUTOL VN BYP,EXTRM REST PAIN |
| ICD 10 | I70.421 | ATHSCL AUTOL VN BYP GRFT,PAIN,R LEG |
| ICD 10 | I70.422 | ATHSCL,AUTOL VN GRFT,EXTRM W PAIN,L LG |
| ICD 10 | I70.423 | ATHSCL AUTOL VN GRFT,PAIN,BILAT LEG |
| ICD 10 | I70.428 | ATHSCL AUTOL VN BYP GRFT PAIN, OTH |
| ICD 10 | I70.429 | ATHSCL AUTOL VN BYP GRFT PAIN,UNSP |
| ICD 10 | I70.43 | ATHSCL AUTOL VN BYP GRFT R LG ULC |
| ICD 10 | I70.431 | ATHSCL,AUTOL VN BYP GRFT,R LG ULC THI |
| ICD 10 | I70.432 | ATHSCL,AUTOL VN BYP GRFT,R LG ULC CALF |
| ICD 10 | I70.433 | ATHSCL,AUTOL VN BYP GRFT,R LG ULC ANK |
| ICD 10 | I70.434 | ATHSCL,AUTOL VN GRFT,R LG ULC,HEEL&FT |
| ICD 10 | I70.435 | ATHSCL,AUTOL VN GRFT,R LG ULC,OTH FT |
| ICD 10 | I70.438 | ATHSCL,AUTOL VN BYP GRFT,R LG ULC,LO |
| ICD 10 | I70.439 | ATHSCL,AUTOL VN GRFT,R LG ULC, UNSP |
| ICD 10 | I70.44 | ATHSCL AUTOL VN BYP GRFT L LG ULC |
| ICD 10 | I70.441 | ATHSCL AUTOL VN BYP GRFT,L LG ULC THI |
| ICD 10 | I70.442 | ATHSCL AUTOL VN BYP GRFT L LG ULC CALF |
| ICD 10 | I70.443 | ATHSCL AUTOL VN BYP GRFT,L LG ULC ANKL |
| ICD 10 | I70.444 | ATHSCL,AUTOL VN GRFT,L LG ULC,HEEL&FT |
| ICD 10 | I70.445 | ATHSCL,AUTOL VN GRFT,L LG ULC,OTH FT |
| ICD 10 | I70.448 | ATHSCL,AUTOL VN GRFT,L LG ULC,OTH LG |
| ICD 10 | I70.449 | ATHSCL,AUTOL VN BYP GRFT,L LG ULC,UNSP |
| ICD 10 | I70.45 | ATHSCL AUTOL VN BYP,OTH EXTRM ULC |
| ICD 10 | I70.46 | ATHSCL AUTOL VN BYP GRFT,EXTRM GANGRN |
| ICD 10 | I70.461 | ATHSCL,AUTOL VN BYP GRFT,GANGR,R LG |
| ICD 10 | I70.462 | ATHSCL,AUTOL VN BYP GRFT,GANGR,L LG |
| ICD 10 | I70.463 | ATHSCL,AUTOL VN BYP GRFT,GNGR,BIL LG |
| ICD 10 | I70.468 | ATHSCL,AUTOL VN GRFT,GANGR,OTH EXTRM |
| ICD 10 | I70.469 | ATHSCL,AUTOL VN GRFT,GANGR,UNSP EXTRM |
| ICD 10 | I70.49 | OTH ATHSCL OF AUTOL VN GRFT,EXTRM |
| ICD 10 | I70.491 | OTH ATHSCL AUTOL VN GRFT,EXTRM,R LG |
| ICD 10 | I70.492 | OTH ATHSCL AUTOL VN GRFT,EXTRM,L LG |
| ICD 10 | I70.493 | OTH ATHSCL,AUTOL VN GRFT,EXTRM,BILAT |
| ICD 10 | I70.498 | OTH ATHSCL,AUTOL VN GRFT,EXTRM,OTH |
| ICD 10 | I70.499 | OTH ATHSCL,AUTOL VN GRFT,EXTRM,UNSP |
| ICD 10 | I70.5 | ATHSCL NONAUT BIOLG BYP GRFT,EXTRM |
| ICD 10 | I70.50 | UNSP ATHSCL NONAUT BIOLG GRFT,EXTRM |
| ICD 10 | I70.501 | UNSP ATHSCL NONAUT BIOLG GRFT,R LG |
| ICD 10 | I70.502 | UNSP ATHSCL NONAUT BIOLG GRFT,L LG |
| ICD 10 | I70.503 | UNSP ATHSCL NONAUT BIOLG GRFT,BIL LG |
| ICD 10 | I70.508 | UNSP ATHSCR NONAUT BIOLG GRFT,OTH EXTRM |
| ICD 10 | I70.509 | UNSP ATHSCL,NONAUT BIOLG GRFT,UNSP EXTRM |
| ICD 10 | I70.51 | ATHSCL,NONAUT BIOLG GRFT,EXTREM CLAD |
| ICD 10 | I70.511 | ATHSCL,NONAUT BIOLG GRFT,CLAD R LEG |
| ICD 10 | I70.512 | ATHSCL NONAUT BIOLG GRFT, CLAD L LEG |
| ICD 10 | I70.513 | ATHSCL,NONAUT BIOLG BYP GRFT,CLAD,BILAT |
| ICD 10 | I70.518 | ATHSCL,NONAUT BIOLG GRFT,CLAD,EXTREM |
| ICD 10 | I70.519 | ATHSCL,NONAUT BIOLG GRFT,CLAD,UNSP |
| ICD 10 | I70.52 | ATHSCL NONAUT BIOLG GRFT,EXTRM PAIN |
| ICD 10 | I70.521 | ATHSCL,NONAUT BIOLG GRFT,PAIN,R LG |
| ICD 10 | I70.522 | ATHSCL,NONAUT BIOLG GRFT,PAIN,L LG |
| ICD 10 | I70.523 | ATHSCL,NONAUT BIOLG GRFT,PAIN,BILAT LG |
| ICD 10 | I70.528 | ATHSCL,NONAUT BIOLG GRFT,PAIN,EXTRM |
| ICD 10 | I70.529 | ATHSCL,NONAUT BIOLG GRFT,PAN,UNSP EXTRM |
| ICD 10 | I70.53 | ATHSCL NONAUT BIOLG BYP GRFT R LEG ULC |
| ICD 10 | I70.531 | ATHSCL NONAUT BIOLG GRFT R LG W/ULC,THI |
| ICD 10 | I70.532 | ATHSCL NONAUT BIOLG GRFT RLEG ULC,CALF |
| ICD 10 | I70.533 | ATHSCL,NONAUT BIOLG GRFT R LEG ULC,ANK |
| ICD 10 | I70.534 | ATHSCL,NONAUT BIOLG GRFT,R LG ULC,HEEL |
| ICD 10 | I70.535 | ATHSCL,NONAUT BIOLG GRFT,R LG ULC,FT |
| ICD 10 | I70.538 | ATHSCL,NONAUT BIOLG GRFT,R LG ULC,LG |
| ICD 10 | I70.539 | ATHSCL,NONAUT BIOLG GRFT,R LG ULC,UNSP |
| ICD 10 | I70.54 | ATHSCL NONAUT BIOLG BYP GRFT L LEG ULC |
| ICD 10 | I70.541 | ATHSCL,NONAUT BIOLG GRFT L LEG ULC,THI |
| ICD 10 | I70.542 | ATHSCL NONAUT BIOLG GRFT LLEG ULC,CALF |
| ICD 10 | I70.543 | ATHSCL,NONAUT BIOLG GRFT L LEG ULC,ANK |
| ICD 10 | I70.544 | ATHSCL,NONAUT BIOLG GRFT,L LG ULC,HEEL |
| ICD 10 | I70.545 | ATHSCL NONAUT BIOLG GRFT,L LG ULC, FT |
| ICD 10 | I70.548 | ATHSCL,NONAUT BIOLG GRFT,L LG ULC,OTH |
| ICD 10 | I70.549 | ATHSCL,NONAUT BIOLG GRFT,L LG ULC,UNSP |
| ICD 10 | I70.55 | ATHSCL,NONAUT BIOLG GRFT,OTH EXTRM ULC |
| ICD 10 | I70.56 | ATHSCL,NONAUT BIOLG GRFT,EXTRM W/GANGR |
| ICD 10 | I70.561 | ATHSCL,NONAUT BIOLG BYP GRFT,GANGR,RLG |
| ICD 10 | I70.562 | ATHSCL,NONAUT BIOLG BYP GRFT,GANGR,LLG |
| ICD 10 | I70.563 | ATHSCL,NONAUT GRFT,EXTRM GANGR,BILAT |
| ICD 10 | I70.568 | ATHSCL,NONAUT BIOLG GRFT,GANGR,EXTRM |
| ICD 10 | I70.569 | ATHSCL,NONAUT BIOLG GRFT,GANGR,UNSP |
| ICD 10 | I70.59 | OTH ATHSCL NONAUT BIOLG GRFT,EXTRM |
| ICD 10 | I70.591 | OTH ATHSCL NONAUT BIOLG GRFT,EXTRM,R LG |
| ICD 10 | I70.592 | OTH ATHSCL NONAUT BIOLG GRFT,EXTRM,L LG |
| ICD 10 | I70.593 | OTH ATHSCL NONAUT BIOLG GRFT,EXTRM,BILAT |
| ICD 10 | I70.598 | OTH ATHSCL NONAUT BIOLG GRFT,EXTRM,OTH |
| ICD 10 | I70.599 | OTH ATHSCL NONAUT BIOLG GRFT,EXTRM,UNSP |
| ICD 10 | I70.6 | ATHSCL,NONBIOLGCL BYP GRFT,EXTREM |
| ICD 10 | I70.60 | UNSP ATHSCL,NONBIOLG GRFT EXTRM |
| ICD 10 | I70.601 | UNSP ATHSCL NONBIOLG GRFT,EXTRM R LG |
| ICD 10 | I70.602 | UNSP ATHSCL NONBIOLG GRFT,EXTRM L LG |
| ICD 10 | I70.603 | UNSP ATHSCL NONBIOLG GRFT,EXTRM,BIL LG |
| ICD 10 | I70.608 | UNSP ATHSCL NONBIOLG GRFT,EXTRM,OTH |
| ICD 10 | I70.609 | UNSP ATHSCL NONBIOLG GRFT,EXTRM,UNSP |
| ICD 10 | I70.61 | ATHSCL,NONBIOLG GRFT,EXTRM W/INTMIT CLAD |
| ICD 10 | I70.611 | ATHSCL NONBIOLG GRFT,INTMIT CLAD R LEG |
| ICD 10 | I70.612 | ATHSCL NONBIOLG GRFT,INTMIT CLAD L LEG |
| ICD 10 | I70.613 | ATHSCL NONBIOLG GRFT,INTMIT CLAD,BILAT |
| ICD 10 | I70.618 | ATHSCL NONBIOLG GRFT,CLAD,OTH EXTRM |
| ICD 10 | I70.619 | ATHSCL NONBIOLG GRFT,CLAD,UNSP EXTRM |
| ICD 10 | I70.62 | ATHSCL NONBIOLG GRFT,EXTRM REST PAIN |
| ICD 10 | I70.621 | ATHSCL,NONBIOLG GRFT,W/REST PAIN,R LG |
| ICD 10 | I70.622 | ATHSCL,NONBIOLG GRFT,W/REST PAIN,L LG |
| ICD 10 | I70.623 | ATHSCL,NONBIOLG GRFT,EXTRM REST PAIN,BIL |
| ICD 10 | I70.628 | ATHSCL NONBIOLG GRFT PAIN,OTH EXTRM |
| ICD 10 | I70.629 | ATHSCL NONBIOLG GRFT PAIN,UNSP EXTRM |
| ICD 10 | I70.63 | ATHSCL NONBIOLG BYP GRFT R LEG W/ULC |
| ICD 10 | I70.631 | ATHSCL NONBIOLG BYP GRFT R LEG ULC,THI |
| ICD 10 | I70.632 | ATHSCL NONBIOLG GRFT R LEG ULC,CALF |
| ICD 10 | I70.633 | ATHSCL NONBIOLG GRFT R LEG ULC,ANKL |
| ICD 10 | I70.634 | ATHSCL,NONBIOLG GRAFT R LG ULCER,HEEL&FT |
| ICD 10 | I70.635 | ATHSCL,NONBIOLG GRFT,R LG ULC,PART FT |
| ICD 10 | I70.638 | ATHSCL,NONBIOLG GRFT,R LG ULCER,LO LG |
| ICD 10 | I70.639 | ATHSCL NONBIOLG BYP GRFT,R LG ULC,UNSP |
| ICD 10 | I70.64 | ATHSCL NONBIOLG BYP GRFT,L LEG W/ULC |
| ICD 10 | I70.641 | ATHSCL NONBIOLG BYP GRFT L LEG ULC,THI |
| ICD 10 | I70.642 | ATHSCL NONBIOLG GRFT L LEG ULC,CALF |
| ICD 10 | I70.643 | ATHSCL NONBIOLG GRFT L LG W/ULC,ANKLE |
| ICD 10 | I70.644 | ATHSCL,NONBIOLG GRFT L LEG W/ULC,HEEL&FT |
| ICD 10 | I70.645 | ATHSCL,NONBIOLG GRFT,L LG ULC,OTH PRT FT |
| ICD 10 | I70.648 | ATHSCL,NONBIOLG GRFT,L LG ULC,OTH PRT LG |
| ICD 10 | I70.649 | ATHSCL NONBIOLG BYP GRFT,L LG ULC,UNSP |
| ICD 10 | I70.65 | ATHSCL,NONBIOLG GRFT,OTH EXTRM W/ULC |
| ICD 10 | I70.66 | ATHSCL NONBIOLG BYP GRFT,EXTRM W/GANGR |
| ICD 10 | I70.661 | ATHSCL NONBIOLG BYP GRFT,GANGRENE,R LG |
| ICD 10 | I70.662 | ATHSCL NONBIOLG BYP GRFT,GANGRENE,L LG |
| ICD 10 | I70.663 | ATHSCL,NONBIOLG GRFT,EXTRM GANGRN,BIL LG |
| ICD 10 | I70.668 | ATHSCL,NONBIOLG GRFT,EXTRM GNGR,OTH |
| ICD 10 | I70.669 | ATHSCL,NONBIOLG GRFT,EXTRM W/GNGR,UNSP |
| ICD 10 | I70.69 | OTH ATHSCL OF NONBIOLG GRFT,EXTREMITIES |
| ICD 10 | I70.691 | OTH ATHSCL OF NONBIOLG GRFT,EXTREM,RLG |
| ICD 10 | I70.692 | OTH ATHSCL OF NONBIOLG GRFT,EXTREM,LLG |
| ICD 10 | I70.693 | OTH ATHSCL, NONBIOLG GRFT,EXTRM,BIL LEGS |
| ICD 10 | I70.698 | OTH ATHSCL,NONBIOLG GRFT,EXTRM,OTH EXTRM |
| ICD 10 | I70.699 | OTH ATHSCL,NONBIOLG GRFT,EXTRM,UNSP |
| ICD 10 | I70.7 | ATHSCL,OTH TYPE OF BYP GRFT,EXTRM |
| ICD 10 | I70.70 | UNSP ATHSCL,OTH TYP,BYP GRFT,EXTRM |
| ICD 10 | I70.701 | UNSP ATHSCL OF BYP GRFT,EXTRM,R LG |
| ICD 10 | I70.702 | UNSP ATHSCL OF BYP GRFT,EXTRM,L LG |
| ICD 10 | I70.703 | UNSP ATHSCL, BYP GRFT,EXTRM,BIL LG |
| ICD 10 | I70.708 | UNSP ATHSCL, BYP GRFT,EXTRM,OTH EXTRM |
| ICD 10 | I70.709 | UNSP ATHSCL,BYP GRFT,EXTRM,UNSP EXTRM |
| ICD 10 | I70.71 | ATHSCL,OTH,BYP GRFT,EXTRM INTMIT CLAD |
| ICD 10 | I70.711 | ATHSCL, GRFT,EXTRM INTMIT CLAD R LG |
| ICD 10 | I70.712 | ATHSCL, GRFT,EXTRM INTMIT CLAD L LG |
| ICD 10 | I70.713 | ATHSCL, BYP GRFT,EXTRM INTMIT CLAD BIL |
| ICD 10 | I70.718 | ATHSCL, BYP GRFT,EXTRM INTMIT CLAD OTH |
| ICD 10 | I70.719 | ATHSCL, GRFT,EXTRM INTMIT CLAD UNSP |
| ICD 10 | I70.72 | ATHSCL, BYP GRFT,EXTRM W/REST PAIN |
| ICD 10 | I70.721 | ATHSCL,BYP GRFT,EXTRM REST PAIN,R LG |
| ICD 10 | I70.722 | ATHSCL,BYP GRFT,EXTRM REST PAIN,L LG |
| ICD 10 | I70.723 | ATHSCL,BYP GRFT,EXTRM REST PAIN,BILAT |
| ICD 10 | I70.728 | ATHSCL,BYP GRFT,EXTRM REST PAIN,OTH |
| ICD 10 | I70.729 | ATHSCL,BYP GRFT,EXTRM REST PAIN,UNSP |
| ICD 10 | I70.73 | ATHSCL,OTH TP,BYP GRFT,RLG W/ULCER |
| ICD 10 | I70.731 | ATHSCL,BYP GRFT,R LG W/ULCER,THIGH |
| ICD 10 | I70.732 | ATHSCL,BYP GRFT,R LG W/ULCER,CALF |
| ICD 10 | I70.733 | ATHSCL,OTH,BYP GRFT,RLG W/ULCER,ANKLE |
| ICD 10 | I70.734 | ATHSCL,BYP GRFT,R LG W/ULCER,HEEL&FT |
| ICD 10 | I70.735 | ATHSCL,BYP GRFT,R LG W/ULC, PART FT |
| ICD 10 | I70.738 | ATHSCL,BYP GRFT,R LG W/ULC,OTH PART LG |
| ICD 10 | I70.739 | ATHSCL,BYP GRFT,R LG W/ULC,UNSP SITE |
| ICD 10 | I70.74 | ATHSCL,OTH TYP,BYP GRFT,L LG W/ULCER |
| ICD 10 | I70.741 | ATHSCL,BYP GRFT,L LG W/ULCER,THIGH |
| ICD 10 | I70.742 | ATHSCL, BYP GRFT,L LG W/ULC,CALF |
| ICD 10 | I70.743 | ATHSCL,BYP GRFT,L LG W/ULCER,ANKLE |
| ICD 10 | I70.744 | ATHSCL,BYP GRFT,L LG W/ULCER,HEEL&FT |
| ICD 10 | I70.745 | ATHSCL,BYP GRFT,L LG W/ULC,OTH PRT |
| ICD 10 | I70.748 | ATHSCL,BYP GRFT,L LG W/ULC,OTH PART LG |
| ICD 10 | I70.749 | ATHSCL,BYP GRFT,L LG W/ULC,UNSP SITE |
| ICD 10 | I70.75 | ATHSCL, BYP GRFT,OTH EXTRM W/ULC |
| ICD 10 | I70.76 | ATHSCL, BYP GRFT,EXTRM W/GANGRN |
| ICD 10 | I70.761 | ATHSCL,BYP GRFT,EXTRM W/GANGR,R LG |
| ICD 10 | I70.762 | ATHSCL,BYP GRFT,EXTRM W/GANGR,L LG |
| ICD 10 | I70.763 | ATHSCL,BYP GRFT,EXTRM W/GANGR,BILAT |
| ICD 10 | I70.768 | ATHSCL,BYP GRFT,EXTRM W/GANGR,OTH |
| ICD 10 | I70.769 | ATHSCL,BYP GRFT,EXTRM W/GANGR,UNSP |
| ICD 10 | I70.79 | OTH ATHSCL,OTH TYP,BYP GRFT,EXTRM |
| ICD 10 | I70.791 | OTH ATHSCL, BYP GRFT,EXTRM,R LG |
| ICD 10 | I70.792 | OTH ATHSCL, BYP GRFT,EXTRM,L LG |
| ICD 10 | I70.793 | OTH ATHSCL, BYP GRFT,EXTRM,BIL LG |
| ICD 10 | I70.798 | OTH ATHSCL, BYP GRFT,EXTRM,OTH EXTRM |
| ICD 10 | I70.799 | OTH ATHSCL, BYP GRFT,EXTRM,UNSP EXTRM |
| ICD 10 | I70.8 | ATHSCL OTH ART |
| ICD 10 | I70.9 | OTH&UNSP ATHEROSCLEROSIS |
| ICD 10 | I70.90 | UNSP ATHSCL |
| ICD 10 | I70.91 | GEN ATHSCL |
| ICD 10 | I70.92 | CHR TOTAL OCCLS ART THE EXTRM |
| ICD 10 | I71 | AORTIC ANEURYSM AND DISSECTION |
| ICD 10 | I71.0 | DISSECTION OF AORTA |
| ICD 10 | I71.00 | DISSECTION UNSP SIT AORT |
| ICD 10 | I71.01 | DISSECTION THOR AORT |
| ICD 10 | I71.02 | DISSECTION ABD AORT |
| ICD 10 | I71.03 | DISSECTION THORCOABD AORT |
| ICD 10 | I71.1 | THOR AORT ANEURYSM RUPT |
| ICD 10 | I71.2 | THOR AORT ANEURYSM WO RUPT |
| ICD 10 | I71.3 | ABD AORT ANEURYSM RUPT |
| ICD 10 | I71.4 | ABD AORT ANEURYSM WO RUPT |
| ICD 10 | I71.5 | THORCOABD AORT ANEURYSM RUPT |
| ICD 10 | I71.6 | THORCOABD AORT ANEURYSM WO RUPT |
| ICD 10 | I71.8 | AORT ANEURYSM UNSP SIT RUPT |
| ICD 10 | I71.9 | AORT ANEURYSM UNSP SIT WO RUPT |
| ICD 10 | I72 | OTH ANEURYSM |
| ICD 10 | I72.0 | ANEURYSM CRTD ART |
| ICD 10 | I72.1 | ANEURYSM ART UP EXTRM |
| ICD 10 | I72.2 | ANEURYSM REN ART |
| ICD 10 | I72.3 | ANEURYSM ILAC ART |
| ICD 10 | I72.4 | ANEURYSM ART LO EXTRM |
| ICD 10 | I72.5 | ANEURYSM OTH PROCECEREB ART |
| ICD 10 | I72.6 | ANEURYSM VERT ART |
| ICD 10 | I72.8 | ANEURYSM OTH SPEC ART |
| ICD 10 | I72.9 | ANEURYSM UNSP SIT |
| ICD 10 | I73 | OTH PERIPHERAL VASCULAR DISEASES |
| ICD 10 | I73.0 | RAYNAUD'S SYNDROME |
| ICD 10 | I73.00 | RAYNAUD'S SYND WO GANGR |
| ICD 10 | I73.01 | RAYNAUD'S SYND W GANGR |
| ICD 10 | I73.1 | THRMBOOANGIITIS OBLITERANS |
| ICD 10 | I73.8 | OTH SPECIFD PERIPHERAL VASCULAR DZ |
| ICD 10 | I73.81 | ERYTHROMELALGIA |
| ICD 10 | I73.89 | OTH SPEC PERIPH VASC DZ |
| ICD 10 | I73.9 | PERIPH VASC DZ UNSP |
| ICD 10 | I74 | ARTERIAL EMBOLISM AND THRMBOOSIS |
| ICD 10 | I74.0 | EMBOLSM&THRMBOOS OF ABDOMNL AORTA |
| ICD 10 | I74.01 | SADDLE EMBOLUS ABD AORT |
| ICD 10 | I74.09 | OTH ART EMBLSM&THRMBO ABD AORT |
| ICD 10 | I74.1 | EMBOLSM&THRMBOOS,OTH UNSP PRTS AORTA |
| ICD 10 | I74.10 | EMBLSM&THRMBO UNSP PARTS AORT |
| ICD 10 | I74.11 | EMBLSM&THRMBO THOR AORT |
| ICD 10 | I74.19 | EMBLSM&THRMBO OTH PARTS AORT |
| ICD 10 | I74.2 | EMBLSM&THRMBO ART THE UP EXTRM |
| ICD 10 | I74.3 | EMBLSM&THRMBO ART THE LO EXTRM |
| ICD 10 | I74.4 | EMBLSM&THRMBO ART EXTRM UNSP |
| ICD 10 | I74.5 | EMBLSM&THRMBO ILAC ART |
| ICD 10 | I74.8 | EMBLSM&THRMBO OTH ART |
| ICD 10 | I74.9 | EMBLSM&THRMBO UNSP ART |
| ICD 10 | I75 | ATHEROEMBOLISM |
| ICD 10 | I75.0 | ATHEROEMBOLISM OF EXTREMITIES |
| ICD 10 | I75.01 | ATHEROEMBOLISM OF UPPER EXTREMITY |
| ICD 10 | I75.011 | ATHEROEMBLSM R UP EXTRM |
| ICD 10 | I75.012 | ATHEROEMBLSM L UP EXTRM |
| ICD 10 | I75.013 | ATHEROEMBLSM BILAT UP EXTRM |
| ICD 10 | I75.019 | ATHEROEMBLSM UNSP UP EXTRM |
| ICD 10 | I75.02 | ATHEROEMBOLISM OF LOWER EXTREMITY |
| ICD 10 | I75.021 | ATHEROEMBLSM R LO EXTRM |
| ICD 10 | I75.022 | ATHEROEMBLSM L LO EXTRM |
| ICD 10 | I75.023 | ATHEROEMBLSM BILAT LO EXTRM |
| ICD 10 | I75.029 | ATHEROEMBLSM UNSP LO EXTRM |
| ICD 10 | I75.8 | ATHEROEMBOLISM OF OTH SITES |
| ICD 10 | I75.81 | ATHEROEMBLSM KID |
| ICD 10 | I75.89 | ATHEROEMBLSM OTH SIT |
| ICD 10 | I76 | SEPTIC ART EMBLSM |
| ICD 10 | I77 | OTH DSRDRS OF ARTERIES&ARTERIOLES |
| ICD 10 | I77.0 | AV FISTULA ACQ |
| ICD 10 | I77.1 | STRICTURE ART |
| ICD 10 | I77.2 | RUPT ART |
| ICD 10 | I77.3 | ART FIBROMUSCULAR DYSPLASIA |
| ICD 10 | I77.4 | CELIAC ARTCOMPRSN SYND |
| ICD 10 | I77.5 | NECR ART |
| ICD 10 | I77.6 | ARTERITIS UNSP |
| ICD 10 | I77.7 | OTH ARTERIAL DISSECTION |
| ICD 10 | I77.70 | DISSECTION UNSP ART |
| ICD 10 | I77.71 | DISSECTION CRTD ART |
| ICD 10 | I77.72 | DISSECTION ILAC ART |
| ICD 10 | I77.73 | DISSECTION REN ART |
| ICD 10 | I77.74 | DISSECTION VERT ART |
| ICD 10 | I77.75 | DISSECTION OTH PROCECEREB ART |
| ICD 10 | I77.76 | DISSECTION ART UP EXTRM |
| ICD 10 | I77.77 | DISSECTION ART LO EXTRM |
| ICD 10 | I77.79 | DISSECTION OTH SPEC ART |
| ICD 10 | I77.8 | OTH SPECFD DSRDR OF ARTERI&ARTERIOL |
| ICD 10 | I77.81 | AORTIC ECTASIA |
| ICD 10 | I77.810 | THOR AORT ECTASIA |
| ICD 10 | I77.811 | ABD AORT ECTASIA |
| ICD 10 | I77.812 | THORCOABD AORT ECTASIA |
| ICD 10 | I77.819 | AORT ECTASIA UNSP SIT |
| ICD 10 | I77.89 | OTH SPEC DISORD ART&ARTERIOLES |
| ICD 10 | I77.9 | DISORD ART&ARTERIOLES UNSP |
| ICD 10 | I78 | DISEASES OF CAPILLARIES |
| ICD 10 | I78.0 | HEREDIT HEMORRHAGIC TELANGIECTASIA |
| ICD 10 | I78.1 | NEVUS NON-NEOPLSTC |
| ICD 10 | I78.8 | OTH DZ CAPILL |
| ICD 10 | I78.9 | DZ CAPILL UNSP |
| ICD 10 | I79 | DSRDR OF ARTER,ARTERIOL&CAPIL DZ CE |
| ICD 10 | I79.0 | ANEURYSM AORT IN DZ CLS ELSWHR |
| ICD 10 | I79.1 | AORTITIS IN DZ CLS ELSWHR |
| ICD 10 | I79.8 | OTH DSRDR ARTER,ARTERIL&CAPIL DZ CE |
| ICD 10 | I80 | PHLEBITIS AND THRMBOOPHLEBITIS |
| ICD 10 | I80.0 | PHLEBITIS SUPRFCL VSSLS,LWR EXTRM |
| ICD 10 | I80.00 | PHLEBITIS SPRFCL VSSLS UNSP LO EXT |
| ICD 10 | I80.01 | PHLEBITIS,SUPRFCL VSSLS R LO EXT |
| ICD 10 | I80.02 | PHLEBITIS,SUPRFCL VSSLS L LO EXT |
| ICD 10 | I80.03 | PHLEBITIS,SUPRFCL VESSL,LWR EXT,BIL |
| ICD 10 | I80.1 | PHLEBITIS&THRMBOO OF FEMORAL VEIN |
| ICD 10 | I80.10 | PHLBTS&THRPHLBTS UNSP FEMR VN |
| ICD 10 | I80.11 | PHLBTS&THRPHLBTS R FEMR VN |
| ICD 10 | I80.12 | PHLBTS&THRPHLBTS L FEMR VN |
| ICD 10 | I80.13 | PHLBTS&THRPHLBTS FEMR VN BILAT |
| ICD 10 | I80.2 | PHLEBTS,OTH UNSP DEEP VSSL,LWR EXTRM |
| ICD 10 | I80.20 | PHLEBITIS,UNSP DEEP VESSLS,LWR EXTRM |
| ICD 10 | I80.201 | PHLEBITIS,UNSP DEEP VSL R LO EXTRM |
| ICD 10 | I80.202 | PHLEBITIS,UNSP DEEP VSL L LO EXTRM |
| ICD 10 | I80.203 | PHLEBITS,UNSP DEEP VSL,LWR EXTRM,BIL |
| ICD 10 | I80.209 | PHLEBITS,UNSP DEEP VSL,UNSP LO EXTRM |
| ICD 10 | I80.21 | PHLEBITIS&THRMBOOPHLEBIT,ILIAC VEIN |
| ICD 10 | I80.211 | PHLBTS&THRPHLBTS R ILAC VN |
| ICD 10 | I80.212 | PHLBTS&THRPHLBTS L ILAC VN |
| ICD 10 | I80.213 | PHLBTS&THRPHLBTS ILAC VN BILAT |
| ICD 10 | I80.219 | PHLBTS&THRPHLBTS UNSP ILAC VN |
| ICD 10 | I80.22 | PHLEBITIS&THRMBOOPHL,POPLITEAL VEIN |
| ICD 10 | I80.221 | PHLBTS&THRPHLBTS R POPL VN |
| ICD 10 | I80.222 | PHLBTS&THRPHLBTS L POPL VN |
| ICD 10 | I80.223 | PHLBTS&THRPHLBTS POPL VN BILAT |
| ICD 10 | I80.229 | PHLBTS&THRPHLBTS UNSP POPL VN |
| ICD 10 | I80.23 | PHLEBITIS&THRMBOOPHLEB, TIBIAL VEIN |
| ICD 10 | I80.231 | PHLBTS&THRPHLBTS R TIB VN |
| ICD 10 | I80.232 | PHLBTS&THRPHLBTS L TIB VN |
| ICD 10 | I80.233 | PHLBTS&THRPHLBTS TIB VN BILAT |
| ICD 10 | I80.239 | PHLBTS&THRPHLBTS UNSP TIB VN |
| ICD 10 | I80.241 | PHLBTS&THRPHLBTS R PERON VN |
| ICD 10 | I80.242 | PHLBTS&THRPHLBTS L PERON VN |
| ICD 10 | I80.243 | PHLBTS&THRPHLBTS PERON VN BILAT |
| ICD 10 | I80.249 | PHLBTS&THRPHLBTS UNSP PERON VN |
| ICD 10 | I80.251 | PHLBTS&THRPHLBTS R CALF MUSCULAR VN |
| ICD 10 | I80.252 | PHLBTS&THRPHLBTS L CALF MUSCULAR VN |
| ICD 10 | I80.253 | PHLEBT THRMBOPHLB,CALF,MUS VEIN BIL |
| ICD 10 | I80.259 | PHLBTS&THRPHLBTS UNSP CALF MUSCULAR VN |
| ICD 10 | I80.29 | PHLEBITIS,OTH DEEP VESSLS,LWR EXTRM |
| ICD 10 | I80.291 | PHLEBITIS,OTH DEEP VSL R LO EXTRM |
| ICD 10 | I80.292 | PHLEBITIS,OTH DEEP VSL L LO EXTRM |
| ICD 10 | I80.293 | PHLEBITS,OTH DEEP VSL,LWR EXTRM,BIL |
| ICD 10 | I80.299 | PHLEBITS,OTH DEEP VSL,UNSP LO EXTRM |
| ICD 10 | I80.3 | PHLBTS&THRPHLBTS LO EXTRM UNSP |
| ICD 10 | I80.8 | PHLBTS&THRPHLBTS OTH SIT |
| ICD 10 | I80.9 | PHLBTS&THRPHLBTS UNSP SIT |
| ICD 10 | I81 | PORT VN THRMBO |
| ICD 10 | I82 | OTH VENOUS EMBOLISM&THRMBOOSIS |
| ICD 10 | I82.0 | BUDD-CHIARI SYND |
| ICD 10 | I82.1 | THRPHLBTS MIGRANS |
| ICD 10 | I82.2 | EMBLSM&THRMB,VENA CAVA&OTH THORACIC |
| ICD 10 | I82.21 | EMBLSM&THRMB,SUPERIOR VENA CAVA |
| ICD 10 | I82.210 | AC EMBLSM&THRMBO SVC |
| ICD 10 | I82.211 | CHR EMBLSM&THRMBO SVC |
| ICD 10 | I82.22 | EMBLSM&THRMB,INFERIOR VENA CAVA |
| ICD 10 | I82.220 | AC EMBLSM&THRMBO IVC |
| ICD 10 | I82.221 | CHR EMBLSM&THRMBO IVC |
| ICD 10 | I82.29 | EMBLSM&THRMB OF OTH THORACIC VEINS |
| ICD 10 | I82.290 | AC EMBLSM&THRMBO OTH THOR VN |
| ICD 10 | I82.291 | CHR EMBLSM&THRMBO OTH THOR VN |
| ICD 10 | I82.3 | EMBLSM&THRMBO REN VN |
| ICD 10 | I82.4 | AC EMBOLIS&THRMBO DEEP VN LO EXTRM |
| ICD 10 | I82.40 | AC EMBOL&THRMBO UNSP DEEP VN LO EXTRM |
| ICD 10 | I82.401 | AC EMBL&THRMBO UNSP DEEP VN R LO EXTRM |
| ICD 10 | I82.402 | AC EMBL&THRMBO UNSP DEEP VN L LO EXTRM |
| ICD 10 | I82.403 | AC EMBL&THRMBO UNSP DP VN LO EXTR,BILAT |
| ICD 10 | I82.409 | AC EMBL&THRMBO UNSP DP VN UNSP LO EXTRM |
| ICD 10 | I82.41 | ACUTE EMBLSM&THRMBOOSI,FEMORAL VEIN |
| ICD 10 | I82.411 | AC EMBLSM&THRMBO R FEMR VN |
| ICD 10 | I82.412 | AC EMBLSM&THRMBO L FEMR VN |
| ICD 10 | I82.413 | AC EMBLSM&THRMBO FEMR VN BILAT |
| ICD 10 | I82.419 | AC EMBLSM&THRMBO UNSP FEMR VN |
| ICD 10 | I82.42 | ACUTE EMBLSM&THRMBOOSIS, ILIAC VEIN |
| ICD 10 | I82.421 | AC EMBLSM&THRMBO R ILAC VN |
| ICD 10 | I82.422 | AC EMBLSM&THRMBO L ILAC VN |
| ICD 10 | I82.423 | AC EMBLSM&THRMBO ILAC VN BILAT |
| ICD 10 | I82.429 | AC EMBLSM&THRMBO UNSP ILAC VN |
| ICD 10 | I82.43 | ACUTE EMBLSM&THRMBOO,POPLITEAL VEIN |
| ICD 10 | I82.431 | AC EMBLSM&THRMBO R POPL VN |
| ICD 10 | I82.432 | AC EMBLSM&THRMBO L POPL VN |
| ICD 10 | I82.433 | AC EMBLSM&THRMBO POPL VN BILAT |
| ICD 10 | I82.439 | AC EMBLSM&THRMBO UNSP POPL VN |
| ICD 10 | I82.44 | ACUTE EMBLSM&THRMBOOSI, TIBIAL VEIN |
| ICD 10 | I82.441 | AC EMBLSM&THRMBO R TIB VN |
| ICD 10 | I82.442 | AC EMBLSM&THRMBO L TIB VN |
| ICD 10 | I82.443 | AC EMBLSM&THRMBO TIB VN BILAT |
| ICD 10 | I82.449 | AC EMBLSM&THRMBO UNSP TIB VN |
| ICD 10 | I82.451 | AC EMBLSM&THRMBO R PERON VN |
| ICD 10 | I82.452 | AC EMBLSM&THRMBO L PERON VN |
| ICD 10 | I82.453 | AC EMBLSM&THRMBO PERON VN BILAT |
| ICD 10 | I82.459 | AC EMBLSM&THRMBO UNSP PERON VN |
| ICD 10 | I82.461 | AC EMBLSM&THRMBO R CALF MUSCULAR VN |
| ICD 10 | I82.462 | AC EMBLSM&THRMBO L CALF MUSCULAR VN |
| ICD 10 | I82.463 | AC EMBOL/THRMBO,CALF,MUS VEIN BIL |
| ICD 10 | I82.469 | AC EMBLSM&THRMBO UNSP CALF MUSCULAR VN |
| ICD 10 | I82.49 | AC THRMBO OTH SPEC DEEP VN LO EXTM |
| ICD 10 | I82.491 | AC THRMB OTH SPEC DEEP VN R LO EX |
| ICD 10 | I82.492 | AC THRMB OTH SPEC DEEP VN L LO EX |
| ICD 10 | I82.493 | AC THRMB OTH SPEC DEEP VN LO, BILAT |
| ICD 10 | I82.499 | AC THRMB OTH SPEC DEEP VN UNSP LO E |
| ICD 10 | I82.4Y | AC THRMBO UNSP DEEP VN PRXML LO |
| ICD 10 | I82.4Y1 | AC THRMB UNSP DEEP VN R PRXML LO |
| ICD 10 | I82.4Y2 | AC THRMB UNSP DEEP VN L PRXML LO |
| ICD 10 | I82.4Y3 | AC THRMB UNSP DEEP VN PRXM LO BILAT |
| ICD 10 | I82.4Y9 | AC THRMB UNSP DEEP VN UNSP PRXM LO |
| ICD 10 | I82.4Z | AC THRMBO UNSP DEEP VN DISTAL LO |
| ICD 10 | I82.4Z1 | AC THRMB UNSP DEEP VN R DISTL LO |
| ICD 10 | I82.4Z2 | AC THRMB UNSP DEEP VN L DISTL LO |
| ICD 10 | I82.4Z3 | AC THRMB UNSP DEEP VN DSTL LO,BILAT |
| ICD 10 | I82.4Z9 | AC THRMB UNSP DEEP VN UNSP DSTL LO |
| ICD 10 | I82.5 | CHRNC THRMBOOSIS DEEP VN LO EXTRM |
| ICD 10 | I82.50 | CHRNC THRMBOOS UNSP DEEP VN LO EXT |
| ICD 10 | I82.501 | CHRN THRMBO UNSP DEEP VNS R LO EXT |
| ICD 10 | I82.502 | CHRN THRMBO UNSP DEEP VNS L LO EXT |
| ICD 10 | I82.503 | CHRN THRMBO UNSP DEEP VNS LO EXT,BI |
| ICD 10 | I82.509 | CHRN THRMBO UNSP DEEP VNS UNSP LO EXT |
| ICD 10 | I82.51 | CHRNC EMBLSM&THRMBOOSI,FEMORAL VEIN |
| ICD 10 | I82.511 | CHR EMBLSM&THRMBO R FEMR VN |
| ICD 10 | I82.512 | CHR EMBLSM&THRMBO L FEMR VN |
| ICD 10 | I82.513 | CHR EMBLSM&THRMBO FEMR VN BILAT |
| ICD 10 | I82.519 | CHR EMBLSM&THRMBO UNSP FEMR VN |
| ICD 10 | I82.52 | CHRONC EMBLSM&THRMBOOSIS,ILIAC VEIN |
| ICD 10 | I82.521 | CHR EMBLSM&THRMBO R ILAC VN |
| ICD 10 | I82.522 | CHR EMBLSM&THRMBO L ILAC VN |
| ICD 10 | I82.523 | CHR EMBLSM&THRMBO ILAC VN BILAT |
| ICD 10 | I82.529 | CHR EMBLSM&THRMBO UNSP ILAC VN |
| ICD 10 | I82.53 | CHRNC EMBLSM&THRMBOO,POPLITEAL VEIN |
| ICD 10 | I82.531 | CHR EMBLSM&THRMBO R POPL VN |
| ICD 10 | I82.532 | CHR EMBLSM&THRMBO L POPL VN |
| ICD 10 | I82.533 | CHR EMBLSM&THRMBO POPL VN BILAT |
| ICD 10 | I82.539 | CHR EMBLSM&THRMBO UNSP POPL VN |
| ICD 10 | I82.54 | CHRNC EMBLSM&THRMBOOSI, TIBIAL VEIN |
| ICD 10 | I82.541 | CHR EMBLSM&THRMBO R TIB VN |
| ICD 10 | I82.542 | CHR EMBLSM&THRMBO L TIB VN |
| ICD 10 | I82.543 | CHR EMBLSM&THRMBO TIB VN BILAT |
| ICD 10 | I82.549 | CHR EMBLSM&THRMBO UNSP TIB VN |
| ICD 10 | I82.551 | CHR EMBLSM&THRMBO R PERON VN |
| ICD 10 | I82.552 | CHR EMBLSM&THRMBO L PERON VN |
| ICD 10 | I82.553 | CHR EMBLSM&THRMBO PERON VN BILAT |
| ICD 10 | I82.559 | CHR EMBLSM&THRMBO UNSP PERON VN |
| ICD 10 | I82.561 | CHR EMBLSM&THRMBO R CALF MUSCULAR VN |
| ICD 10 | I82.562 | CHR EMBLSM&THRMBO L CALF MUSCULAR VN |
| ICD 10 | I82.563 | CHRON EMBOL/THRM CALF MUSC VEIN BIL |
| ICD 10 | I82.569 | CHRON EMBOL/THROM UNSP CALF MUSC VEIN |
| ICD 10 | I82.59 | CHRNC THRMBOO OTH SP DEEP VN LO EX |
| ICD 10 | I82.591 | CHRNC THRMBO OTH SP DEEP VN R LO |
| ICD 10 | I82.592 | CHRNC THRMBO OTH SP DEEP VN L LE |
| ICD 10 | I82.593 | CHRNC THRMB OTH SP DEEP VN LO,BIL |
| ICD 10 | I82.599 | CHRNC THRMB OTH SP DEEP VN UNSP LO |
| ICD 10 | I82.5Y | CHRNC THRMBOO UNSP DEEP VN PRXML LE |
| ICD 10 | I82.5Y1 | CHRNC THRMBO UNSP DEEP VN R PRXM L |
| ICD 10 | I82.5Y2 | CHRNC THRMBO UNSP DEEP VN L PRXM LO |
| ICD 10 | I82.5Y3 | CHRNC THRMB UNSP DEEP VN PRXM LO,BIL |
| ICD 10 | I82.5Y9 | CHRNC THRMB UNSP DEEP VN UNSP PRXM L |
| ICD 10 | I82.5Z | CHRNC THRMBOO UNSP DEEP VN DISTL LO |
| ICD 10 | I82.5Z1 | CHRNC THRMBO UNSP DEEP VN R DIST LO |
| ICD 10 | I82.5Z2 | CHRNC THRMBO UNSP DEEP VN L DIST LO |
| ICD 10 | I82.5Z3 | CHRNC THRMB UNSP DEEP VN DIST LO,BIL |
| ICD 10 | I82.5Z9 | CHRNC THRMB UNSP DEEP VN UNSP DIST LO |
| ICD 10 | I82.6 | ACUTE EMBLSM&THRMB,VEINS,UPPR EXTRM |
| ICD 10 | I82.60 | ACUTE EMBLSM&THRMB,UNSP VNS,UPPR EXT |
| ICD 10 | I82.601 | AC EMBLSM&THRMBO UNSP VN R UP EXTRM |
| ICD 10 | I82.602 | AC EMBLSM&THRMBO UNSP VN L UP EXTRM |
| ICD 10 | I82.603 | ACUTE THRMBOOSI,UNSP VNS,UPR EXT,BIL |
| ICD 10 | I82.609 | AC EMBLSM&THRMBO UNSP VN UNSP UP EXTRM |
| ICD 10 | I82.61 | ACUTE THRMBOOSIS,SPRFCL VN,UPPR EXT |
| ICD 10 | I82.611 | AC EMBLSM&THRMBO SUPRF VN R UP EXTRM |
| ICD 10 | I82.612 | AC EMBLSM&THRMBO SUPRF VN L UP EXTRM |
| ICD 10 | I82.613 | ACUTE THRMBOO,SPRFCL VN,UPR EXT,BIL |
| ICD 10 | I82.619 | ACUTE THRMBOO,SPRFCL VN,UNSP UPR EXT |
| ICD 10 | I82.62 | ACUTE EMBLSM&THRMB,DEEP VNS,UPR EXT |
| ICD 10 | I82.621 | AC EMBLSM&THRMBO DP VN R UP EXTRM |
| ICD 10 | I82.622 | AC EMBLSM&THRMBO DP VN L UP EXTRM |
| ICD 10 | I82.623 | AC EMBLSM&THRMBO DP VN UP EXTRM BILAT |
| ICD 10 | I82.629 | AC EMBLSM&THRMBO DP VN UNSP UP EXTRM |
| ICD 10 | I82.7 | CHRNC EMBLSM THRMB,VEINS,UPPR EXTRM |
| ICD 10 | I82.70 | CHRNC EMBLSM THRMB,UNSP VNS,UPPR EXT |
| ICD 10 | I82.701 | CHR EMBLSM&THRMBO UNSP VN R UP EXTRM |
| ICD 10 | I82.702 | CHR EMBLSM&THRMBO UNSP VN L UP EXTRM |
| ICD 10 | I82.703 | CHRNC THRMBOOSI,UNSP VNS,UPR EXT,BIL |
| ICD 10 | I82.709 | CHRNC THRMBOOSI,UNSP VNS,UNSP UPR EXT |
| ICD 10 | I82.71 | CHRNC THRMBOOSIS,SPRFCL VN,UPPR EXT |
| ICD 10 | I82.711 | CHR EMBLSM&THRMBO SUPRF VN R UP EXTRM |
| ICD 10 | I82.712 | CHR EMBLSM&THRMBO SUPRF VN L UP EXTRM |
| ICD 10 | I82.713 | CHRNC THRMBOO,SPRFCL VN,UPR EXT,BIL |
| ICD 10 | I82.719 | CHRNC THRMBOO,SPRFCL VN,UNSP UPR EXT |
| ICD 10 | I82.72 | CHRNC EMBLSM THRMB,DEEP VNS,UPR EXT |
| ICD 10 | I82.721 | CHR EMBLSM&THRMBO DP VN R UP EXTRM |
| ICD 10 | I82.722 | CHR EMBLSM&THRMBO DP VN L UP EXTRM |
| ICD 10 | I82.723 | CHR EMBLSM&THRMBO DP VN UP EXTRM BILAT |
| ICD 10 | I82.729 | CHR EMBLSM&THRMBO DP VN UNSP UP EXTRM |
| ICD 10 | I82.8 | EMBOLISM THRMBO OF OTH SPECFD VEINS |
| ICD 10 | I82.81 | EMBLSM THRMB,SPRFCL VEINS,LWR EXTRM |
| ICD 10 | I82.811 | EMBLSM&THRMBO SUPRF VN R LO EXTRM |
| ICD 10 | I82.812 | EMBLSM&THRMBO SUPRF VN L LO EXTRM |
| ICD 10 | I82.813 | EMBLSM&THRMBO SUPRF VN LO EXTRM BILAT |
| ICD 10 | I82.819 | EMBLSM&THRMBO SUPRF VN UNSP LO EXTRM |
| ICD 10 | I82.89 | EMBOLISM THRMB OF OTH SPECFD VEINS |
| ICD 10 | I82.890 | AC EMBLSM&THRMBO OTH SPEC VN |
| ICD 10 | I82.891 | CHR EMBLSM&THRMBO OTH SPEC VN |
| ICD 10 | I82.9 | EMBOLISM&THRMBOOSIS OF UNSPEC VEIN |
| ICD 10 | I82.90 | AC EMBLSM&THRMBO UNSP VN |
| ICD 10 | I82.91 | CHR EMBLSM&THRMBO UNSP VN |
| ICD 10 | I82.A | EMBOLSM&THRMBOOSIS OF AXILLARY VEIN |
| ICD 10 | I82.A1 | ACUTE EMBLSM&THRMB OF AXILLARY VEIN |
| ICD 10 | I82.A11 | AC EMBLSM&THRMBO R AXLY VN |
| ICD 10 | I82.A12 | AC EMBLSM&THRMBO L AXLY VN |
| ICD 10 | I82.A13 | AC EMBLSM&THRMBO AXLY VN BILAT |
| ICD 10 | I82.A19 | AC EMBLSM&THRMBO UNSP AXLY VN |
| ICD 10 | I82.A2 | CHRNC EMBLSM&THRMB OF AXILLARY VEIN |
| ICD 10 | I82.A21 | CHR EMBLSM&THRMBO R AXLY VN |
| ICD 10 | I82.A22 | CHR EMBLSM&THRMBO L AXLY VN |
| ICD 10 | I82.A23 | CHR EMBLSM&THRMBO AXLY VN BILAT |
| ICD 10 | I82.A29 | CHR EMBLSM&THRMBO UNSP AXLY VN |
| ICD 10 | I82.B | EMBOLISM&THRMBOOSIS,SUBCLAVIAN VEIN |
| ICD 10 | I82.B1 | ACUTE EMBLSM&THRMB,SUBCLAVIAN VEIN |
| ICD 10 | I82.B11 | AC EMBLSM&THRMBO R SUBCLAV VN |
| ICD 10 | I82.B12 | AC EMBLSM&THRMBO L SUBCLAV VN |
| ICD 10 | I82.B13 | AC EMBLSM&THRMBO SUBCLAV VN BILAT |
| ICD 10 | I82.B19 | AC EMBLSM&THRMBO UNSP SUBCLAV VN |
| ICD 10 | I82.B2 | CHRNC EMBLSM&THRMB,SUBCLAVIAN VEIN |
| ICD 10 | I82.B21 | CHR EMBLSM&THRMBO R SUBCLAV VN |
| ICD 10 | I82.B22 | CHR EMBLSM&THRMBO L SUBCLAV VN |
| ICD 10 | I82.B23 | CHR EMBLSM&THRMBO SUBCLAV VN BILAT |
| ICD 10 | I82.B29 | CHR EMBLSM&THRMBO UNSP SUBCLAV VN |
| ICD 10 | I82.C | EMBLSM&THRMBO,INTERNAL JUGULAR VEIN |
| ICD 10 | I82.C1 | ACUTE EMBLSM&THRMB,INTRNL JUGLR VN |
| ICD 10 | I82.C11 | AC EMBLSM&THRMBO R INTER JUG VN |
| ICD 10 | I82.C12 | AC EMBLSM&THRMBO L INTER JUG VN |
| ICD 10 | I82.C13 | AC EMBLSM&THRMBO INTER JUG VN BILAT |
| ICD 10 | I82.C19 | AC EMBLSM&THRMBO UNSP INTER JUG VN |
| ICD 10 | I82.C2 | CHRONC EMBLSM&THRMB,INTRNL JUGLR VN |
| ICD 10 | I82.C21 | CHR EMBLSM&THRMBO R INTER JUG VN |
| ICD 10 | I82.C22 | CHR EMBLSM&THRMBO L INTER JUG VN |
| ICD 10 | I82.C23 | CHR EMBLSM&THRMBO INTER JUG VN BILAT |
| ICD 10 | I82.C29 | CHR EMBLSM&THRMBO UNSP INTER JUG VN |
| ICD 10 | I83 | VARICOSE VEINS OF LOWER EXTREMITIES |
| ICD 10 | I83.0 | VARICOSE VEINS OF LO EXTRM W/ULCER |
| ICD 10 | I83.00 | VRCS VEINS, UNSP LO EXTRM W/ULCER |
| ICD 10 | I83.001 | VARICOSE VN UNSP LO EXTRM W ULC THI |
| ICD 10 | I83.002 | VARICOSE VN UNSP LO EXTRM W ULC CALF |
| ICD 10 | I83.003 | VARICOSE VN UNSP LO EXTRM W ULC ANKL |
| ICD 10 | I83.004 | VRCS VEIN, LO EXTRM W/ULCER,HL&FT |
| ICD 10 | I83.005 | VRCS VEIN, LO EXTRM W/ULCER,PRT FT |
| ICD 10 | I83.008 | VRCS VEIN,EXTRM W/ULCER,PRT LO LEG |
| ICD 10 | I83.009 | VRCS VEIN, LO EXTRM W/ULCER,UNSP ST |
| ICD 10 | I83.01 | VARICOSE VEINS R LO EXTRM W/ULCER |
| ICD 10 | I83.011 | VARICOSE VN R LO EXTRM W ULC THI |
| ICD 10 | I83.012 | VARICOSE VN R LO EXTRM W ULC CALF |
| ICD 10 | I83.013 | VARICOSE VN R LO EXTRM W ULC ANKL |
| ICD 10 | I83.014 | VRCS VN R LO EXTRM W/ULCER,HL&FT |
| ICD 10 | I83.015 | VRCS VN R LO EXTRM W/ULCER,PT FT |
| ICD 10 | I83.018 | VRCS VN R LO EXTRM W/ULCER,PT LEG |
| ICD 10 | I83.019 | VARICOSE VN R LO EXTRM W ULC UNSP SIT |
| ICD 10 | I83.02 | VARICOSE VEINS L LO EXTRM W/ULCER |
| ICD 10 | I83.021 | VARICOSE VN L LO EXTRM W ULC THI |
| ICD 10 | I83.022 | VARICOSE VN L LO EXTRM W ULC CALF |
| ICD 10 | I83.023 | VARICOSE VN L LO EXTRM W ULC ANKL |
| ICD 10 | I83.024 | VRCS VN L LO EXTRM W/ULCER,HL&FT |
| ICD 10 | I83.025 | VRCS VN L LO EXTRM W/ULCER,PT FT |
| ICD 10 | I83.028 | VRCS VN L LO EXTRM W/ULCER,PT LEG |
| ICD 10 | I83.029 | VARICOSE VN L LO EXTRM W ULC UNSP SIT |
| ICD 10 | I83.1 | VARICOSE VEINS,LWR EXTRM W/INFLAMTN |
| ICD 10 | I83.10 | VARICOSE VN UNSP LO EXTRM W INFLM |
| ICD 10 | I83.11 | VARICOSE VN R LO EXTRM W INFLM |
| ICD 10 | I83.12 | VARICOSE VN L LO EXTRM W INFLM |
| ICD 10 | I83.2 | VRCS VEIN,LWR EXTRM W/ULCER&INFLMTN |
| ICD 10 | I83.20 | VRCS VN,UNSP LO EXTRM W/ULCER&INFLM |
| ICD 10 | I83.201 | VRCS VN,LWR EXT W/ULCER,THIGH&INFLM |
| ICD 10 | I83.202 | VRCS VN,LWR EXT W/ULCER,CALF&INFLM |
| ICD 10 | I83.203 | VRCS VN,LWR EXT W/ULCER,ANKLE&INFLM |
| ICD 10 | I83.204 | VRCS VN,LWR EXT W/ULCER,HL&FT&INFLM |
| ICD 10 | I83.205 | VRCS VN,LWR EXT W/ULCER,PT FT&INFLM |
| ICD 10 | I83.208 | VRCS VN,W/ULCER,OTH PRT LO&INFLM |
| ICD 10 | I83.209 | VRCS VN,LWR EXT W/ULCER,UNS&INFLM |
| ICD 10 | I83.21 | VARICOS VN R LO EXT W/ULCER&INFLM |
| ICD 10 | I83.211 | VRCS R LO EXT W/ULCER,THIGH&INFLM |
| ICD 10 | I83.212 | VARCS R LO EXT W/ULCER,CALF&INFLM |
| ICD 10 | I83.213 | VRCS R LO EXT W/ULCER,ANKLE&INFLM |
| ICD 10 | I83.214 | VRCS R LO EXT W/ULCER,HL&FT&INFLM |
| ICD 10 | I83.215 | VRCS R LO EXT W/ULCER,PT FT&INFLM |
| ICD 10 | I83.218 | VARCS R LO EXT W/ULCER,LWR&INFLM |
| ICD 10 | I83.219 | VRCS R LO EXT W/ULCER,UNS&INFLM |
| ICD 10 | I83.22 | VRCS VN L LO EXT W/ULCER&INFLM |
| ICD 10 | I83.221 | VRCS L LO EXT W/ULCER,THIGH&INFLM |
| ICD 10 | I83.222 | VARCS L LO EXT W/ULCER,CALF&INFLM |
| ICD 10 | I83.223 | VRCS L LO EXT W/ULCER,ANKLE&INFLM |
| ICD 10 | I83.224 | VRCS L LO EXT W/ULCER,HL&FT&INFLM |
| ICD 10 | I83.225 | VRCS L LO EXT W/ULCER,PT FT&INFLM |
| ICD 10 | I83.228 | VARCS L LO EXT W/ULCER,LWR&INFLM |
| ICD 10 | I83.229 | VRCS L LO EXT W/ULCER,UNS&INFLM |
| ICD 10 | I83.8 | VRCS VEINS,LWR EXTRM WOTH COMPLCTN |
| ICD 10 | I83.81 | VARICOSE VEINS OF LO EXTREM W/PAIN |
| ICD 10 | I83.811 | VARICOSE VN R LO EXTRM W PAIN |
| ICD 10 | I83.812 | VARICOSE VN L LO EXTRM W PAIN |
| ICD 10 | I83.813 | VARICOSE VN BILAT LO EXTRM W PAIN |
| ICD 10 | I83.819 | VARICOSE VN UNSP LO EXTRM W PAIN |
| ICD 10 | I83.89 | VRCS VEINS,LWR EXTRM WOTH COMPLCTN |
| ICD 10 | I83.891 | VARICOSE VN R LO EXTRM W OTH COMP |
| ICD 10 | I83.892 | VARICOSE VN L LO EXTRM W OTH COMP |
| ICD 10 | I83.893 | VARICOSE VN BILAT LO EXTRM W OTH COMP |
| ICD 10 | I83.899 | VARICOSE VN UNSP LO EXTRM W OTH COMP |
| ICD 10 | I83.9 | ASYMPTOMATIC VRCS VEINS,LWR EXTREMI |
| ICD 10 | I83.90 | ASYMPTC VARICOSE VN UNSP LO EXTRM |
| ICD 10 | I83.91 | ASYMPTC VARICOSE VN R LO EXTRM |
| ICD 10 | I83.92 | ASYMPTC VARICOSE VN L LO EXTRM |
| ICD 10 | I83.93 | ASYMPTC VARICOSE VN BILAT LO EXTRM |
| ICD 10 | I85 | ESOPHAGEAL VARICES |
| ICD 10 | I85.0 | ESOPHAGEAL VARICES |
| ICD 10 | I85.00 | ESOPHAGEAL VARICES WO BLED |
| ICD 10 | I85.01 | ESOPHAGEAL VARICES W BLED |
| ICD 10 | I85.1 | SECONDARY ESOPHAGEAL VARICES |
| ICD 10 | I85.10 | SEC ESOPHAGEAL VARICES WO BLED |
| ICD 10 | I85.11 | SEC ESOPHAGEAL VARICES W BLED |
| ICD 10 | I86 | VARICOSE VEINS OF OTH SITES |
| ICD 10 | I86.0 | SUBLINGUAL VARICES |
| ICD 10 | I86.1 | SCROTAL VARICES |
| ICD 10 | I86.2 | PELV VARICES |
| ICD 10 | I86.3 | VULVAL VARICES |
| ICD 10 | I86.4 | GASTR VARICES |
| ICD 10 | I86.8 | VARICOSE VN OTH SPEC SIT |
| ICD 10 | I87 | OTH DISORDERS OF VEINS |
| ICD 10 | I87.0 | POSTTHRMBOOTIC SYNDROME |
| ICD 10 | I87.00 | POSTTHRMBOOTIC SYN WO COMPLCTNS |
| ICD 10 | I87.001 | POSTTHROM SYND WO COMP R LO EXTRM |
| ICD 10 | I87.002 | POSTTHROM SYND WO COMP L LO EXTRM |
| ICD 10 | I87.003 | POSTTHROM SYND WO COMP BILAT LO EXTRM |
| ICD 10 | I87.009 | POSTTHROM SYND WO COMP UNSP EXTRM |
| ICD 10 | I87.01 | POSTTHRMBOOTIC SYND W ULCER |
| ICD 10 | I87.011 | POSTTHROM SYND W ULC R LO EXTRM |
| ICD 10 | I87.012 | POSTTHROM SYND W ULC L LO EXTRM |
| ICD 10 | I87.013 | POSTTHROM SYND W ULC BILAT LO EXTRM |
| ICD 10 | I87.019 | POSTTHROM SYND W ULC UNSP LO EXTRM |
| ICD 10 | I87.02 | POSTTHRMBOOTIC SYND W/INFLAMMTN |
| ICD 10 | I87.021 | POSTTHROM SYND W INFLM R LO EXTRM |
| ICD 10 | I87.022 | POSTTHROM SYND W INFLM L LO EXTRM |
| ICD 10 | I87.023 | POSTTHROM SYND W INFLM BILAT LO EXTRM |
| ICD 10 | I87.029 | POSTTHROM SYND W INFLM UNSP LO EXTRM |
| ICD 10 | I87.03 | POSTTHRMBOOTIC SYND W/ULCER&INFLM |
| ICD 10 | I87.031 | POSTTHROM SYND W ULC&INFLM R LO EXTRM |
| ICD 10 | I87.032 | POSTTHROM SYND W ULC&INFLM L LO EXTRM |
| ICD 10 | I87.033 | POSTTHRMB SYN W/ULCER&INFLM,BIL LO |
| ICD 10 | I87.039 | POSTTHRMB SYN W/ULCER&INFLM,UNSP LO |
| ICD 10 | I87.09 | POSTTHRMBOOTIC SYN WOTH COMPLCTN |
| ICD 10 | I87.091 | POSTTHROM SYND W OTH COMP R LO EXTRM |
| ICD 10 | I87.092 | POSTTHROM SYND W OTH COMP L LO EXTRM |
| ICD 10 | I87.093 | POSTHRMB SYN WOTH COMP,BIL LO EXT |
| ICD 10 | I87.099 | POSTTHROM SYND W OTH COMP UNSP LO EXTRM |
| ICD 10 | I87.1 | COMPRSN VN |
| ICD 10 | I87.2 | VENOUS INSUFF (CHR) (PERIPH) |
| ICD 10 | I87.3 | CHR VENOUS HYPERTEN(IDIOPATHIC) |
| ICD 10 | I87.30 | CHRNC VENOUS HTN(IDIOPTHC)WO COMPL |
| ICD 10 | I87.301 | CHRNC VNOUS HTN WO COMP R LO EXT |
| ICD 10 | I87.302 | CHRNC VNOUS HTN WO COMP L LO EXT |
| ICD 10 | I87.303 | CHRNC VNOUS HTN WO COMP,BI LO EXT |
| ICD 10 | I87.309 | CHRNC VNOUS HTN WO COMP,UNSP LO EX |
| ICD 10 | I87.31 | CHR VENOUS HTN W/ULCER |
| ICD 10 | I87.311 | CHR VENOUS HTN (IDIO) W ULC R LO EXTRM |
| ICD 10 | I87.312 | CHR VENOUS HTN (IDIO) W ULC L LO EXTRM |
| ICD 10 | I87.313 | CHRNC VNOUS HTN W/ULCER,BIL LO EXT |
| ICD 10 | I87.319 | CHRNC VNOUS HTN W/ULCER,UNSP LO EXT |
| ICD 10 | I87.32 | CHR VENOUS HTN W/INFLAMMATION |
| ICD 10 | I87.321 | CHRNC VENOUS HTN W/INFLM R LO EXT |
| ICD 10 | I87.322 | CHRNC VENOUS HTN W/INFLM L LO EXT |
| ICD 10 | I87.323 | CHRNC VNOUS HTN W/INFLM,BIL LO EXT |
| ICD 10 | I87.329 | CHRNC VNOUS HTN W/INFLM,UNSP LO EXT |
| ICD 10 | I87.33 | CHR VENOUS HTN W/ULCER&INFLM |
| ICD 10 | I87.331 | CHRNC VENOUS HTN W/ULCER&INFLM, RLE |
| ICD 10 | I87.332 | CHRNC VENOUS HTN W/ULCER&INFLM, LLE |
| ICD 10 | I87.333 | CHRNC VENOUS HTN,ULCER&INFLM, BI LE |
| ICD 10 | I87.339 | CHRNC VENUS HTN,ULCER&INFLM, UNSP LE |
| ICD 10 | I87.39 | CHR VENOUS HTN WOTH COMPLCTN |
| ICD 10 | I87.391 | CHRNC VENOUS HTN WOTH COMPL, RLE |
| ICD 10 | I87.392 | CHRNC VENOUS HTN WOTH COMPL, LLE |
| ICD 10 | I87.393 | CHRNC VENOUS HTN WOTH COMPL, BI LE |
| ICD 10 | I87.399 | CHRNC VENUS HTN WOTH COMPL, UNSP LE |
| ICD 10 | I87.8 | OTH SPEC DISORD VN |
| ICD 10 | I87.9 | DISORD VN UNSP |
| ICD 10 | I88 | NONSPECIFIC LYMPHADENITIS |
| ICD 10 | I88.0 | NOSPEC MESENT LYMPHADENITIS |
| ICD 10 | I88.1 | CHR LYMPHADENITIS EXCEPT MESENT |
| ICD 10 | I88.8 | OTH NOSPEC LYMPHADENITIS |
| ICD 10 | I88.9 | NOSPEC LYMPHADENITIS UNSP |
| ICD 10 | I89 | OTH NONINFCTV DSRD,LYMPHTC VSSL LNS |
| ICD 10 | I89.0 | LYMPHEDEMA NEC |
| ICD 10 | I89.1 | LYMPHANGITIS |
| ICD 10 | I89.8 | OTH SPCFD NONINFCTV DSRD,LYMPHTC VS |
| ICD 10 | I89.9 | NONINFCTV DSRD,LYMPHTC VSL&LNS,UNSP |
| ICD 10 | I95 | HYPOTENSION |
| ICD 10 | I95.0 | IDIO HYPOTENSION |
| ICD 10 | I95.1 | ORTHOSTATIC HYPOTENSION |
| ICD 10 | I95.2 | HYPOTENSION D/T DRGS |
| ICD 10 | I95.3 | HYPOTENSION HEMODIALYSIS |
| ICD 10 | I95.8 | OTH HYPOTENSION |
| ICD 10 | I95.81 | POSTP HYPOTENSION |
| ICD 10 | I95.89 | OTH HYPOTENSION |
| ICD 10 | I95.9 | HYPOTENSION UNSP |
| ICD 10 | I96 | GANGR NEC |
| ICD 10 | I97 | INTRAOP&POSTP CMPL&DSRD,CIR SYS,NEC |
| ICD 10 | I97.0 | POSTCARDIOTOMY SYND |
| ICD 10 | I97.1 | OTH POSTPRC CARDIAC FUNC DISTURBNCS |
| ICD 10 | I97.11 | POSTPROCEDURL CARDIAC INSUFFICIENCY |
| ICD 10 | I97.110 | POSTP CARD INSUFF FOL CARD SURG |
| ICD 10 | I97.111 | POSTP CARD INSUFF FOL OTH SURG |
| ICD 10 | I97.12 | POSTPROCEDURAL CARDIAC ARREST |
| ICD 10 | I97.120 | POSTP CARD ARREST FOL CARD SURG |
| ICD 10 | I97.121 | POSTP CARD ARREST FOL OTH SURG |
| ICD 10 | I97.13 | POSTPROCEDURAL HEART FAIL |
| ICD 10 | I97.130 | POSTP HRT FAIL FOL CARD SURG |
| ICD 10 | I97.131 | POSTP HRT FAIL FOL OTH SURG |
| ICD 10 | I97.19 | OTH POSTPRCDRL CARDIAC FUNCTNL DIST |
| ICD 10 | I97.190 | OTH POSTPRC CRDC FUNC DIS FG CRD SU |
| ICD 10 | I97.191 | OTH POSTPRC CRDC FUNC DIS FG OTH SU |
| ICD 10 | I97.2 | POSTMASTECTOMY LYMPHEDEMA SYND |
| ICD 10 | I97.3 | POSTP HTN |
| ICD 10 | I97.4 | INTRAOP HEM&HEMTM CIRCUL COMPL PROC |
| ICD 10 | I97.41 | INTRAOP HEM&HMT,COMPL CIRC SYS PROC |
| ICD 10 | I97.410 | INTRAOP HEM&HMT,COMPL CARDIAC CATH |
| ICD 10 | I97.411 | INTRAOP HEM&HMT,COMPL CARDIAC BYPAS |
| ICD 10 | I97.418 | INTRAOP HEM&HMT,COMPL OTH CIRC PROC |
| ICD 10 | I97.42 | INTRAOP HEM&HMT,COMPL OTH PROCURE |
| ICD 10 | I97.5 | ACCID PUNC&LAC,CIRC SYS DURING PROC |
| ICD 10 | I97.51 | ACCID PUNC&LAC,DURING CIRC SYS PROC |
| ICD 10 | I97.52 | ACCID PUNC&LAC CIRCUL SYS OTH PROC |
| ICD 10 | I97.6 | POSTP HEM HEMA CIRC SYS ORG FOL PRO |
| ICD 10 | I97.61 | PP HEM CIRC SYS ORG FOL CIR SYS PRO |
| ICD 10 | I97.610 | PSTP HEM CIRC SYS ORG FOL CARD CATH |
| ICD 10 | I97.611 | PSTP HEM CIR SYS ORG FOL CARD BYPAS |
| ICD 10 | I97.618 | PP HEM CIR SYS ORG FOL OTH CIR PROC |
| ICD 10 | I97.62 | PP HEM HEMA SER CIR SY FOL OTH PROC |
| ICD 10 | I97.620 | POSTPROC HEMOR CIR SYS FOL OTH PROC |
| ICD 10 | I97.621 | POSTPROC HEMA CIR SYS FOL OTH PROC |
| ICD 10 | I97.622 | POSTPROC SEROM CIR SYS FOL OTH PROC |
| ICD 10 | I97.63 | PP HEMA CIR SYS ORG FOL CIR SYS PRO |
| ICD 10 | I97.630 | PP HEMA CIRC SYS ORG FOL CARD CATH |
| ICD 10 | I97.631 | PP HEMA CIRC SYS ORG FOL CARD BYPAS |
| ICD 10 | I97.638 | PP HEMA CIR SYS ORG FOL OTH CIR PRO |
| ICD 10 | I97.64 | PP SERO CIR SYS ORG FOL CIR SYS PRO |
| ICD 10 | I97.640 | PP SEROM CIRC SYS ORG FOL CARD CATH |
| ICD 10 | I97.641 | PP SEROM CIRC SYS ORG FOL CARD BYPS |
| ICD 10 | I97.648 | PP SER CIR SYS ORG FOL OTH CIR PROC |
| ICD 10 | I97.7 | INTRAOP CARDIAC FUNCTNL DISTURBANCE |
| ICD 10 | I97.71 | INTRAOPERATIVE CARDIAC ARREST |
| ICD 10 | I97.710 | INTROP CARD ARREST DUR CARD SURG |
| ICD 10 | I97.711 | INTROP CARD ARREST DUR OTH SURG |
| ICD 10 | I97.79 | OTH INTRAOP CARDIAC FUNCTNL DISTURB |
| ICD 10 | I97.790 | OTH INTRAOP CRDC DISTRB,CRDC SURGER |
| ICD 10 | I97.791 | OTH INTRAOP CRDC DISTRB,OTH SURGERY |
| ICD 10 | I97.8 | OTH INTRAOP&POSTPRC COMPL,CIRC SYST |
| ICD 10 | I97.81 | INTRAOPERATIVE CEREBVASC INFARCTION |
| ICD 10 | I97.810 | INTROP CEREBVASC INFRC DUR CARD SURG |
| ICD 10 | I97.811 | INTROP CEREBVASC INFRC DUR OTH SURG |
| ICD 10 | I97.82 | POSTPROCEDURAL CEREBVASC INFARCTION |
| ICD 10 | I97.820 | POSTP CEREBVASC INFRC FOL CARD SURG |
| ICD 10 | I97.821 | POSTP CEREBVASC INFRC FOL OTH SURG |
| ICD 10 | I97.88 | OTH INTROP COMP THE CIRC SYS NEC |
| ICD 10 | I97.89 | OTH POSTP COMP&DISORD THE CIRC SYS NEC |
| ICD 10 | I99 | OTH&UNSP DSRDRS OF CIRCULATORY SYS |
| ICD 10 | I99.8 | OTH DISORD CIRC SYS |
| ICD 10 | I99.9 | UNSP DISORD CIRC SYS |
